# Supplementary material
Source: Research Square preprint supplement (doi:10.21203/rs.3.rs-8764411/v1)
Supplement: Supplementary file 2 [file 9bf2f209da7790c423f1aafd.xlsx]

## Sheet: Table 1
Table 1. List of primers used in this study.
Primer Name	Forward (5'-3')	Reverse (5'-3')
Primers for gene cloning and vector construction
Cas-9-gRT1-OsRR22	AGGTTCTTGAGACCCTCCTC gttttagagctagaaat
Cas-9-OsU6aT1-OsRR22	GAGGAGGGTCTCAAGAACCT Cggcagccaagccagca
Cas-9-gRT2-OsWRKY53	TCCTACTTCGCCATCCCGCC gttttagagctagaaat
Cas-9-OsU6bT2-OsWRKY53	GGCGGGATGGCGAAGTAGGA Caacacaagcggcagc
Cas-9-gRT3-OsARF18	CGTCAGGTTCATGGCCGATC gttttagagctagaaat
Cas-9-OsU3T3-OsARF18	GATCGGCCATGAACCTGACG GCCACGGATCATCTGCA
U-F	CTCCGTTTTACCTGTGGAATCG
gRNA-R	CGGAGGAAAATTCCATCCAC
Pps-R	TTCAGAggtctcT accg ACTAGTATGGAATCGGCAGCAAAGG
Pgs-L	AGCGTGggtctcG ctcg ACGCGTATCCATCCACTCCAAGCTC
SP-L	GCGGTGTCATCTATGTTACTAG
SP-R	TGCAATAACTTCGTATAGGC
Primers for RT-qPCR
qACTIN1-1	TGTATGCCAGTGGTCGTACCA	CCAGCAAGGTCGAGACGAA
qOsRR22-F/R	TCACCAGGGAAAATGTTGCA	CTCCAAAGGCAGCAACAATG
qOsWRKY53-F/R	TCCTCAGCTCCTCCCATATCTTG	TGCTGAGAAGCGATGAGATCGG
qOsARF18-F/R	GTTGGTCCTATGTGCTATTTCCC	AGACTCGACTGCAGTTTGTTAAG
qOsHKT2;1	CACAGTCTCCTCGTTTGCGAA	GCAAGAATCTGGCCGATGAA
qOsHKT1；5	CCATCAACTACAGCGTCCTCAACATC	ACTTCCCTGAGAAGCCAACCCAC
qOsHKT1；1	TTCACCACTCTTGCGGCTATG	TGTTTGTAGCCAGTCTCCCCAG
qOsSOS1	CATCGTCACACGAAAGCAAGCT	CATGCTGGGAGAATCGACTCT
qOsHAK1	TGGTGTACCTGATGGGCGAGG	GATTTCATACGTGATCCCAACCTT
qOsAKT1	ATCCTTGTGCCAGTTGTTGC	TCCTTTACGACACCAGCCAT
qOsNHX1	AGAATCGCTGGGTCAATGAGT	TGAAGATGATCGGAGGGAGG
qOsPOD1	ACGTCGGGGTCGCCAACAAC	CGAACTCGTCCACCGACGCC
Primers for Yeast one-hybrid
OsWRKY53-pGADT7	TATGGCCATGGAGGCCAGTGAATTCATGGCGTCCTCGACGG	TCTGCAGCTCGAGCTCGATGGATCCCTAGCAGAGGAGCGACTCGA
OsRR22-Pro-phis2	ATACGACTCACTATAGGGCGAATTCAACAGGGCAGCACCTC	ACCGCGGATCGATTCGCGAACGCGTCCCAATTTGACCCCAA
OsARF18-Pro-phis2	ATTCCCGGGGAGCTCGTGTTTGAATCCCTTGTGAAAGAA	CGAACGCGTGAGCTCCTCTTCGACGCAAAAATCTTTCA
Primers for Yeast two-hybrid
OsWRKY53-pGADT7	TATGGCCATGGAGGCCAGTGAATTCATGGCGTCCTCGACGG	TCTGCAGCTCGAGCTCGATGGATCCCTAGCAGAGGAGCGACTCGA
OsRR22-pGBKT7	GCATATGGCCATGGAGGCCGAATTCATGCTTCTGGGTGCTT	GCGGCCGCTGCAGGTCGACGGATCCTCATATGCAGGCACCA
OsARF18-pGBKT7	ATGGAGGCCGAATTCATGATAACTTTCGTGGATTCCGCG	GATCCCCGGGAATTCCCTCGCTAAGTTATCGCCGC
Primers for Luciferase reporter
OsWRKY53-62sk	CGGCCGCTCTAGAACTAGTGGATCCATGGCGTCCTCGACGG	TATCGATAAGCTTGATATCGAATTCCTAGCAGAGGAGCGACTCGA
OsRR22-Pro-0800	CGAATTCCTGCAGCCCGGGGGATCCAACAGGGCAGCACCTC	CGGCCGCTCTAGAACTAGTGGATCCCCCAATTTGACCCCAA
OsARF18-Pro-0800	TTCCTGCAGCCCGGGGTGTTTGAATCCCTTGTGAAAGAA	AGTGGATCCCCCGGGCTCTTCGACGCAAAAATCTTTCA
Primers for BiFC
OsWRKY53-NYFP	CAGGCCTGGCGCGCCACTAGTGGATCCATGGCGTCCTCGACGG	GCTCCATCCCGGGAGCGGTACCCTCGAGCTCGAGGCAGAGGAGCGACTCGAC
OsRR22-CYFP	CAGGCCTGGCGCGCCACTAGTGGATCCATGCTTCTGGGTGCTT	GTACATCCCGGGAGCGGTACCCTCGAGCTCGAGTATGCAGGCACCAAGT

## Sheet: Table2
Table 2. Gene Ontology (GO) analysis of DEGs in NaCl treatment vs. Control.
category	term	ontology	numDEInCat	numInCat	over_represented_pvalue	over_represented_FDR
GO:0016023	cytoplasmic membrane-bounded vesicle	CC	941	4662	1.6743e-80	6.29202e-77
GO:0055114	oxidation-reduction process	BP	429	1592	5.47161e-60	1.02812e-56
GO:0020037	heme binding	MF	218	581	1.90254e-56	2.38325e-53
GO:0005506	iron ion binding	MF	176	526	1.02889e-37	9.66641e-35
GO:0004497	monooxygenase activity	MF	129	336	5.70249e-34	4.28599e-31
GO:0016705	oxidoreductase activity, acting on paired donors, with incorporation or reduction of molecular oxygen	MF	130	367	9.4808e-31	5.93814e-28
GO:0009055	electron carrier activity	MF	172	604	1.34796e-28	7.23662e-26
GO:0004601	peroxidase activity	MF	75	182	1.0254e-23	4.81683e-21
GO:0048046	apoplast	CC	104	303	1.57558e-23	6.5789e-21
GO:0006979	response to oxidative stress	BP	82	224	1.18404e-21	4.44961e-19
GO:0005975	carbohydrate metabolic process	BP	126	431	4.33334e-21	1.48043e-18
GO:0005576	extracellular region	CC	71	190	1.19184e-20	3.73246e-18
GO:0016021	integral component of membrane	CC	281	1331	2.39898e-20	6.9349e-18
GO:0006468	protein phosphorylation	BP	331	1647	7.13505e-19	1.91525e-16
GO:0004674	protein serine/threonine kinase activity	MF	278	1348	1.64814e-17	4.12913e-15
GO:0004553	hydrolase activity, hydrolyzing O-glycosyl compounds	MF	85	278	3.01617e-16	7.08424e-14
GO:0016020	membrane	CC	398	2287	7.22203e-16	1.59649e-13
GO:0055085	transmembrane transport	BP	118	446	1.89911e-15	3.96491e-13
GO:0008152	metabolic process	BP	184	874	2.75781e-15	5.45466e-13
GO:0009505	plant-type cell wall	CC	65	191	8.79457e-15	1.6525e-12
GO:0046872	metal ion binding	MF	170	819	4.01663e-14	7.18786e-12
GO:0005886	plasma membrane	CC	302	1616	4.2113e-14	7.19366e-12
GO:0005618	cell wall	CC	96	390	7.51412e-13	1.22774e-10
GO:0005524	ATP binding	MF	490	2885	1.07967e-12	1.69058e-10
GO:0009624	response to nematode	BP	37	89	1.19425e-11	1.79519e-09
GO:0016758	transferase activity, transferring hexosyl groups	MF	72	297	1.41884e-10	2.05076e-08
GO:0080167	response to karrikin	BP	38	110	1.07017e-09	1.46833e-07
GO:0005215	transporter activity	MF	54	186	1.09402e-09	1.46833e-07
GO:0005773	vacuole	CC	104	475	2.01396e-09	2.60981e-07
GO:0016762	xyloglucan:xyloglucosyl transferase activity	MF	17	29	2.90492e-09	3.63889e-07
GO:0016998	cell wall macromolecule catabolic process	BP	21	46	3.92102e-09	4.75329e-07
GO:0009651	response to salt stress	BP	67	268	4.65376e-09	5.46526e-07
GO:0006073	cellular glucan metabolic process	BP	16	28	1.41547e-08	1.61192e-06
GO:0009664	plant-type cell wall organization	BP	18	39	2.87336e-08	3.17591e-06
GO:0006629	lipid metabolic process	BP	61	250	3.52122e-08	3.78078e-06
GO:0009414	response to water deprivation	BP	31	90	6.04596e-08	6.31131e-06
GO:0030001	metal ion transport	BP	21	54	8.23527e-08	8.36437e-06
GO:0019953	sexual reproduction	BP	12	20	4.40719e-07	4.32508e-05
GO:0006032	chitin catabolic process	BP	14	28	4.48851e-07	4.32508e-05
GO:0015297	antiporter activity	MF	19	45	5.39195e-07	5.06574e-05
GO:0006855	drug transmembrane transport	BP	19	45	5.79858e-07	5.18835e-05
GO:0015238	drug transmembrane transporter activity	MF	19	45	5.79858e-07	5.18835e-05
GO:0016747	transferase activity, transferring acyl groups other than amino-acyl groups	MF	48	193	6.19684e-07	5.41575e-05
GO:0043086	negative regulation of catalytic activity	BP	34	125	1.21047e-06	0.000103385
GO:0006950	response to stress	BP	34	120	1.41191e-06	0.000117099
GO:0030247	polysaccharide binding	MF	41	158	1.43335e-06	0.000117099
GO:0009765	photosynthesis, light harvesting	BP	8	10	1.76786e-06	0.000141354
GO:0005507	copper ion binding	MF	56	253	2.12328e-06	0.000166235
GO:0009416	response to light stimulus	BP	21	57	2.25147e-06	0.000172674
GO:0006833	water transport	BP	7	8	2.52377e-06	0.000189687
GO:0016706	oxidoreductase activity, acting on paired donors, with incorporation or reduction of molecular oxygen, 2-oxoglutarate as one donor, and incorporation of one atom each of oxygen into both donors	MF	33	119	2.59851e-06	0.000191474
GO:0009737	response to abscisic acid	BP	43	174	7.61055e-06	0.000550009
GO:0009637	response to blue light	BP	10	17	9.35564e-06	0.000663368
GO:0009753	response to jasmonic acid	BP	16	40	1.36435e-05	0.000949485
GO:0016717	oxidoreductase activity, acting on paired donors, with oxidation of a pair of donors resulting in the reduction of molecular oxygen to two molecules of water	MF	7	9	1.49391e-05	0.00102074
GO:0031012	extracellular matrix	CC	10	20	1.7344e-05	0.00116391
GO:0004568	chitinase activity	MF	12	28	1.78876e-05	0.00117933
GO:0005509	calcium ion binding	MF	72	372	1.866e-05	0.00120904
GO:0009627	systemic acquired resistance	BP	10	19	2.05375e-05	0.00130813
GO:0080170	hydrogen peroxide transmembrane transport	BP	5	5	2.13892e-05	0.00133967
GO:0008643	carbohydrate transport	BP	16	45	2.61725e-05	0.0016124
GO:0009817	defense response to fungus, incompatible interaction	BP	19	60	2.93205e-05	0.0017772
GO:0008107	galactoside 2-alpha-L-fucosyltransferase activity	MF	10	19	3.3287e-05	0.00198559
GO:0010167	response to nitrate	BP	8	13	3.57977e-05	0.00209619
GO:0009607	response to biotic stimulus	BP	12	29	3.62567e-05	0.00209619
GO:0016491	oxidoreductase activity	MF	86	477	4.58791e-05	0.00258739
GO:0004364	glutathione transferase activity	MF	6	8	4.61297e-05	0.00258739
GO:0008272	sulfate transport	BP	8	13	4.8083e-05	0.00265729
GO:0009611	response to wounding	BP	30	120	5.12528e-05	0.00279142
GO:0009705	plant-type vacuole membrane	CC	15	39	5.54174e-05	0.00297512
GO:0016788	hydrolase activity, acting on ester bonds	MF	45	212	5.77675e-05	0.00305761
GO:0045735	nutrient reservoir activity	MF	18	60	6.24149e-05	0.00325771
GO:0008061	chitin binding	MF	9	19	8.66297e-05	0.00445965
GO:0030170	pyridoxal phosphate binding	MF	30	114	9.20481e-05	0.00467455
GO:0048544	recognition of pollen	BP	33	135	9.89119e-05	0.00495615
GO:0042546	cell wall biogenesis	BP	10	22	0.000170603	0.00843588
GO:0004650	polygalacturonase activity	MF	15	45	0.000211801	0.010337
GO:0005516	calmodulin binding	MF	18	64	0.000217141	0.0104617
GO:0030145	manganese ion binding	MF	15	49	0.000221926	0.010557
GO:0022891	substrate-specific transmembrane transporter activity	MF	14	40	0.000226125	0.0106222
GO:0010333	terpene synthase activity	MF	16	53	0.00023252	0.0107695
GO:0009535	chloroplast thylakoid membrane	CC	51	274	0.000235908	0.0107695
GO:0008271	secondary active sulfate transmembrane transporter activity	MF	7	12	0.000237857	0.0107695
GO:0022900	electron transport chain	BP	27	113	0.000246148	0.0110122
GO:0071805	potassium ion transmembrane transport	BP	13	35	0.000252401	0.0111591
GO:0009617	response to bacterium	BP	12	33	0.000259612	0.0113444
GO:0005354	galactose transmembrane transporter activity	MF	4	4	0.000288838	0.0123347
GO:0015757	galactose transport	BP	4	4	0.000288838	0.0123347
GO:0006809	nitric oxide biosynthetic process	BP	4	4	0.000308357	0.0130203
GO:0048527	lateral root development	BP	13	40	0.000323547	0.0135099
GO:0009704	de-etiolation	BP	10	27	0.000367871	0.0151919
GO:0008146	sulfotransferase activity	MF	12	37	0.000452529	0.0182101
GO:0010043	response to zinc ion	BP	14	43	0.000454626	0.0182101
GO:0000166	nucleotide binding	MF	123	765	0.000455494	0.0182101
GO:0080046	quercetin 4'-O-glucosyltransferase activity	MF	6	10	0.000488643	0.0193297
GO:0016165	linoleate 13S-lipoxygenase activity	MF	8	17	0.000574247	0.0224794
GO:0046686	response to cadmium ion	BP	62	333	0.000609692	0.0236209
GO:0000162	tryptophan biosynthetic process	BP	6	10	0.000623391	0.0239051
GO:0009626	plant-type hypersensitive response	BP	8	17	0.000648962	0.0244539
GO:0009751	response to salicylic acid	BP	14	43	0.000650716	0.0244539
GO:0009409	response to cold	BP	38	183	0.00066586	0.0247753
GO:0007165	signal transduction	BP	21	80	0.000752248	0.0277152
GO:0042802	identical protein binding	MF	21	81	0.000808633	0.0294868
GO:0019825	oxygen binding	MF	5	8	0.000820736	0.0294868
GO:0060416	response to growth hormone	BP	9	25	0.000823873	0.0294868
GO:0044237	cellular metabolic process	BP	22	92	0.000847588	0.0300494
GO:0005992	trehalose biosynthetic process	BP	10	27	0.000908531	0.031909
GO:0010114	response to red light	BP	9	23	0.000974009	0.0338919
GO:0050832	defense response to fungus	BP	14	46	0.00101061	0.0348429
GO:0015706	nitrate transport	BP	5	8	0.00109722	0.037485
GO:0010224	response to UV-B	BP	10	28	0.00115317	0.0390416
GO:0006633	fatty acid biosynthetic process	BP	21	86	0.00116363	0.0390439
GO:0010119	regulation of stomatal movement	BP	13	41	0.00121172	0.0402977
GO:0031408	oxylipin biosynthetic process	BP	9	23	0.00131099	0.0429708
GO:0045926	negative regulation of growth	BP	3	3	0.00131497	0.0429708
GO:0009116	nucleoside metabolic process	BP	7	16	0.00145626	0.0471779
GO:0006869	lipid transport	BP	10	33	0.00153685	0.0493632
GO:0016720	delta12-fatty acid dehydrogenase activity	MF	3	3	0.00159027	0.0506459
GO:0030246	carbohydrate binding	MF	35	170	0.00161521	0.051008
GO:0050896	response to stimulus	BP	9	25	0.00167717	0.0525235
GO:0046658	anchored component of plasma membrane	CC	11	33	0.00190287	0.0590989
GO:0009807	lignan biosynthetic process	BP	4	6	0.00193806	0.0596986
GO:0050662	coenzyme binding	MF	23	102	0.00197364	0.0603005
GO:1901700	response to oxygen-containing compound	BP	6	14	0.0021211	0.0615719
GO:0005365	myo-inositol transmembrane transporter activity	MF	3	3	0.0021791	0.0615719
GO:0015148	D-xylose transmembrane transporter activity	MF	3	3	0.0021791	0.0615719
GO:0015575	mannitol transmembrane transporter activity	MF	3	3	0.0021791	0.0615719
GO:0015576	sorbitol transmembrane transporter activity	MF	3	3	0.0021791	0.0615719
GO:0015591	D-ribose transmembrane transporter activity	MF	3	3	0.0021791	0.0615719
GO:0015752	D-ribose transport	BP	3	3	0.0021791	0.0615719
GO:0015753	D-xylose transport	BP	3	3	0.0021791	0.0615719
GO:0015795	sorbitol transport	BP	3	3	0.0021791	0.0615719
GO:0015797	mannitol transport	BP	3	3	0.0021791	0.0615719
GO:0015079	potassium ion transmembrane transporter activity	MF	9	24	0.00222079	0.0622815
GO:0004476	mannose-6-phosphate isomerase activity	MF	3	3	0.00227034	0.0627349
GO:0009298	GDP-mannose biosynthetic process	BP	3	3	0.00227034	0.0627349
GO:0008289	lipid binding	MF	9	30	0.00228866	0.0627795
GO:0009703	nitrate reductase (NADH) activity	MF	3	3	0.00232921	0.0634289
GO:0004575	sucrose alpha-glucosidase activity	MF	6	12	0.0023636	0.0639021
GO:0005874	microtubule	CC	20	82	0.00250821	0.0673275
GO:0009871	jasmonic acid and ethylene-dependent systemic resistance, ethylene mediated signaling pathway	BP	4	6	0.00260962	0.0695529
GO:0019288	isopentenyl diphosphate biosynthetic process, methylerythritol 4-phosphate pathway	BP	4	6	0.00269311	0.0712725
GO:0009723	response to ethylene	BP	12	40	0.00282069	0.074127
GO:0042128	nitrate assimilation	BP	4	6	0.00290659	0.0758538
GO:0009926	auxin polar transport	BP	5	9	0.00301266	0.0780799
GO:0044765	single-organism transport	BP	7	17	0.00316747	0.0815298
GO:0005875	microtubule associated complex	CC	17	68	0.00346732	0.0886406
GO:0009610	response to symbiotic fungus	BP	4	6	0.00356672	0.0899952
GO:0004672	protein kinase activity	MF	58	334	0.0035682	0.0899952
GO:0007018	microtubule-based movement	BP	16	61	0.00369202	0.0912903
GO:0046274	lignin catabolic process	BP	8	21	0.00369242	0.0912903
GO:0052716	hydroquinone:oxygen oxidoreductase activity	MF	8	21	0.00369242	0.0912903
GO:0006949	syncytium formation	BP	5	10	0.00400757	0.0984343
GO:0004675	transmembrane receptor protein serine/threonine kinase activity	MF	9	26	0.00408858	0.0991283
GO:0007178	transmembrane receptor protein serine/threonine kinase signaling pathway	BP	9	26	0.00408858	0.0991283
GO:0016787	hydrolase activity	MF	50	291	0.00412381	0.0993416
GO:0080044	quercetin 7-O-glucosyltransferase activity	MF	5	10	0.00430104	0.102765
GO:0055069	zinc ion homeostasis	BP	5	10	0.00432061	0.102765
GO:0006810	transport	BP	42	230	0.0043525	0.102872
GO:0010218	response to far red light	BP	7	18	0.00466505	0.10957
GO:0009058	biosynthetic process	BP	24	117	0.00485261	0.113268
GO:0045087	innate immune response	BP	3	4	0.0048948	0.113547
GO:0009741	response to brassinosteroid	BP	5	10	0.00494963	0.114115
GO:0003993	acid phosphatase activity	MF	13	50	0.00501121	0.11483
GO:0009538	photosystem I reaction center	CC	3	4	0.00505539	0.11514
GO:0009113	purine nucleobase biosynthetic process	BP	3	4	0.00556885	0.125714
GO:0048564	photosystem I assembly	BP	3	4	0.00561863	0.125714
GO:0010035	response to inorganic substance	BP	3	4	0.00562001	0.125714
GO:0008964	phosphoenolpyruvate carboxylase activity	MF	4	7	0.006062	0.134799
GO:0004857	enzyme inhibitor activity	MF	14	64	0.0063472	0.139676
GO:0045485	omega-6 fatty acid desaturase activity	MF	3	4	0.00638967	0.139676
GO:0005249	voltage-gated potassium channel activity	MF	7	19	0.00639511	0.139676
GO:0009707	chloroplast outer membrane	CC	7	19	0.00643	0.139676
GO:0005783	endoplasmic reticulum	CC	47	263	0.00667137	0.144086
GO:0015979	photosynthesis	BP	18	90	0.00740674	0.156408
GO:0031219	levanase activity	MF	4	7	0.00743609	0.156408
GO:0051670	inulinase activity	MF	4	7	0.00743609	0.156408
GO:0071836	nectar secretion	BP	4	7	0.00743609	0.156408
GO:0018456	aryl-alcohol dehydrogenase (NAD+) activity	MF	3	4	0.0074824	0.156408
GO:0050660	flavin adenine dinucleotide binding	MF	31	157	0.0074916	0.156408
GO:0006873	cellular ion homeostasis	BP	4	7	0.00773002	0.160494
GO:0042538	hyperosmotic salinity response	BP	9	31	0.00778755	0.1608
GO:0005355	glucose transmembrane transporter activity	MF	3	4	0.00799597	0.163309
GO:0015758	glucose transport	BP	3	4	0.00799597	0.163309
GO:0007623	circadian rhythm	BP	5	12	0.00823653	0.166388
GO:0010241	ent-kaurene oxidation to kaurenoic acid	BP	3	4	0.00823743	0.166388
GO:0043546	molybdopterin cofactor binding	MF	3	4	0.00827954	0.166388
GO:0008728	GTP diphosphokinase activity	MF	3	4	0.00832738	0.166459
GO:0009674	potassium:sodium symporter activity	MF	3	4	0.00839085	0.16684
GO:0009734	auxin-activated signaling pathway	BP	15	67	0.00863233	0.170035
GO:0006857	oligopeptide transport	BP	8	24	0.00864203	0.170035
GO:0006813	potassium ion transport	BP	7	20	0.00885307	0.17328
GO:0015977	carbon fixation	BP	5	12	0.00914734	0.178112
GO:0006754	ATP biosynthetic process	BP	5	11	0.00924967	0.179177
GO:0000287	magnesium ion binding	MF	31	163	0.00950973	0.18327
GO:0009507	chloroplast	CC	131	914	0.00983982	0.188663
GO:0009640	photomorphogenesis	BP	8	25	0.0101704	0.194012
GO:0032259	methylation	BP	38	218	0.0108176	0.205315
GO:0010501	RNA secondary structure unwinding	BP	2	2	0.010985	0.206441
GO:0051536	iron-sulfur cluster binding	MF	11	42	0.0109868	0.206441
GO:0052861	glucan endo-1,3-beta-glucanase activity, C-3 substituted reducing group	MF	2	2	0.011842	0.220308
GO:0052862	glucan endo-1,4-beta-glucanase activity, C-3 substituted reducing group	MF	2	2	0.011842	0.220308
GO:0009269	response to desiccation	BP	6	17	0.0119829	0.220919
GO:0006631	fatty acid metabolic process	BP	5	12	0.0119924	0.220919
GO:0010270	photosystem II oxygen evolving complex assembly	BP	2	2	0.0120708	0.221279
GO:0008970	phosphatidylcholine 1-acylhydrolase activity	MF	4	8	0.0121576	0.221787
GO:0042651	thylakoid membrane	CC	4	9	0.0124142	0.224916
GO:0009744	response to sucrose	BP	7	22	0.0124488	0.224916
GO:0080043	quercetin 3-O-glucosyltransferase activity	MF	5	12	0.0128154	0.230431
GO:0015112	nitrate transmembrane transporter activity	MF	3	5	0.0129631	0.231977
GO:0016131	brassinosteroid metabolic process	BP	4	8	0.0133621	0.237986
GO:0009570	chloroplast stroma	CC	53	319	0.0135011	0.239326
GO:0009686	gibberellin biosynthetic process	BP	4	8	0.0136004	0.239955
GO:0010337	regulation of salicylic acid metabolic process	BP	3	5	0.0138306	0.242875
GO:0009768	photosynthesis, light harvesting in photosystem I	BP	2	2	0.0144849	0.253183
GO:0008843	endochitinase activity	MF	2	2	0.015248	0.265286
GO:0009826	unidimensional cell growth	BP	10	38	0.0154745	0.267986
GO:0009715	chalcone biosynthetic process	BP	2	2	0.0156821	0.269102
GO:0016210	naringenin-chalcone synthase activity	MF	2	2	0.0156821	0.269102
GO:0009809	lignin biosynthetic process	BP	6	18	0.01601	0.27072
GO:0009815	1-aminocyclopropane-1-carboxylate oxidase activity	MF	2	2	0.0160232	0.27072
GO:0009835	fruit ripening	BP	2	2	0.0160232	0.27072
GO:0051504	diterpene phytoalexin precursor biosynthetic process pathway	BP	2	2	0.0160645	0.27072
GO:0015116	sulfate transmembrane transporter activity	MF	2	2	0.0165421	0.277489
GO:0009620	response to fungus	BP	6	17	0.0168633	0.277489
GO:0008898	S-adenosylmethionine-homocysteine S-methyltransferase activity	MF	2	2	0.017135	0.277489
GO:0004629	phospholipase C activity	MF	2	2	0.0171508	0.277489
GO:0009395	phospholipid catabolic process	BP	2	2	0.0171508	0.277489
GO:0010136	ureide catabolic process	BP	2	2	0.0172025	0.277489
GO:0016102	diterpenoid biosynthetic process	BP	2	2	0.0173115	0.277489
GO:0036201	ent-isokaurene C2-hydroxylase activity	MF	2	2	0.0173115	0.277489
GO:0042221	response to chemical	BP	3	5	0.0174328	0.277489
GO:0016857	racemase and epimerase activity, acting on carbohydrates and derivatives	MF	2	2	0.0175331	0.277489
GO:0004375	glycine dehydrogenase (decarboxylating) activity	MF	2	2	0.0175738	0.277489
GO:0048511	rhythmic process	BP	2	2	0.0175738	0.277489
GO:0004049	anthranilate synthase activity	MF	2	2	0.0175738	0.277489
GO:0004300	enoyl-CoA hydratase activity	MF	2	2	0.0175738	0.277489
GO:0008361	regulation of cell size	BP	2	2	0.0175738	0.277489
GO:0080086	stamen filament development	BP	3	5	0.0179978	0.282099
GO:0005985	sucrose metabolic process	BP	6	17	0.0180159	0.282099
GO:0015798	myo-inositol transport	BP	3	5	0.0182223	0.284147
GO:0004560	alpha-L-fucosidase activity	MF	3	5	0.0183096	0.284328
GO:0019752	carboxylic acid metabolic process	BP	4	9	0.0184478	0.28523
GO:0046688	response to copper ion	BP	4	9	0.0186814	0.28523
GO:0004367	glycerol-3-phosphate dehydrogenase [NAD+] activity	MF	3	5	0.0187894	0.28523
GO:0046168	glycerol-3-phosphate catabolic process	BP	3	5	0.0187894	0.28523
GO:0009827	plant-type cell wall modification	BP	3	5	0.0189051	0.28523
GO:0016114	terpenoid biosynthetic process	BP	3	5	0.0189075	0.28523
GO:0009899	ent-kaurene synthase activity	MF	3	5	0.0189075	0.28523
GO:0003682	chromatin binding	MF	53	330	0.0189749	0.28523
GO:0009941	chloroplast envelope	CC	51	306	0.019423	0.290803
GO:0017089	glycolipid transporter activity	MF	3	6	0.0199896	0.293568
GO:0046836	glycolipid transport	BP	3	6	0.0199896	0.293568
GO:0051861	glycolipid binding	MF	3	6	0.0199896	0.293568
GO:0005385	zinc ion transmembrane transporter activity	MF	4	10	0.0199983	0.293568
GO:0071577	zinc ion transmembrane transport	BP	4	10	0.0199983	0.293568
GO:0010466	negative regulation of peptidase activity	BP	6	20	0.0204799	0.299469
GO:0015743	malate transport	BP	4	9	0.0220981	0.321879
GO:0046577	long-chain-alcohol oxidase activity	MF	3	6	0.0224656	0.325969
GO:0009615	response to virus	BP	5	15	0.0232667	0.336293
GO:0009555	pollen development	BP	14	62	0.0237448	0.341269
GO:0031540	regulation of anthocyanin biosynthetic process	BP	3	6	0.0237926	0.341269
GO:0003333	amino acid transmembrane transport	BP	7	25	0.0248365	0.354888
GO:0004089	carbonate dehydratase activity	MF	4	11	0.0252042	0.35778
GO:0006970	response to osmotic stress	BP	6	19	0.0252293	0.35778
GO:0005513	detection of calcium ion	BP	2	3	0.0258349	0.363624
GO:0042539	hypotonic salinity response	BP	2	3	0.0258349	0.363624
GO:0015995	chlorophyll biosynthetic process	BP	5	14	0.0267373	0.374921
GO:0051501	diterpene phytoalexin metabolic process	BP	3	6	0.026894	0.375716
GO:0010196	nonphotochemical quenching	BP	3	6	0.0273434	0.38058
GO:0015168	glycerol transmembrane transporter activity	MF	3	6	0.0284626	0.393245
GO:0015793	glycerol transport	BP	3	6	0.0284626	0.393245
GO:0003777	microtubule motor activity	MF	12	52	0.0289405	0.398382
GO:0006909	phagocytosis	BP	3	6	0.0298567	0.409373
GO:0019318	hexose metabolic process	BP	3	6	0.0299568	0.409373
GO:0006982	response to lipid hydroperoxide	BP	2	3	0.0302325	0.410158
GO:0010335	response to non-ionic osmotic stress	BP	2	3	0.0302325	0.410158
GO:0016123	xanthophyll biosynthetic process	BP	3	6	0.0306187	0.413903
GO:0006829	zinc ion transport	BP	2	3	0.0311981	0.420174
GO:0009061	anaerobic respiration	BP	2	3	0.0314167	0.420174
GO:0004834	tryptophan synthase activity	MF	3	6	0.031418	0.420174
GO:0005542	folic acid binding	MF	2	3	0.0320892	0.427629
GO:0009628	response to abiotic stimulus	BP	7	26	0.0323618	0.429068
GO:0005887	integral component of plasma membrane	CC	6	22	0.0324256	0.429068
GO:0005544	calcium-dependent phospholipid binding	MF	4	11	0.033053	0.433129
GO:0006885	regulation of pH	BP	3	6	0.0331785	0.433129
GO:0015385	sodium:proton antiporter activity	MF	3	6	0.0331785	0.433129
GO:0004044	amidophosphoribosyltransferase activity	MF	2	3	0.0332407	0.433129
GO:0016765	transferase activity, transferring alkyl or aryl (other than methyl) groups	MF	3	6	0.0333087	0.433129
GO:0009331	glycerol-3-phosphate dehydrogenase complex	CC	3	6	0.0339416	0.439836
GO:0009360	DNA polymerase III complex	CC	3	6	0.0341124	0.44053
GO:0005375	copper ion transmembrane transporter activity	MF	3	7	0.0348436	0.448433
GO:0006814	sodium ion transport	BP	5	15	0.0354498	0.454677
GO:0006406	mRNA export from nucleus	BP	2	3	0.036122	0.461722
GO:0016036	cellular response to phosphate starvation	BP	12	55	0.0379566	0.483528
GO:0042542	response to hydrogen peroxide	BP	7	26	0.0399378	0.507048
GO:0009644	response to high light intensity	BP	6	21	0.0400849	0.507202
GO:0009654	photosystem II oxygen evolving complex	CC	6	24	0.040352	0.508869
GO:0010189	vitamin E biosynthetic process	BP	4	11	0.0411171	0.515103
GO:0016119	carotene metabolic process	BP	2	3	0.0411205	0.515103
GO:0006520	cellular amino acid metabolic process	BP	8	32	0.0418367	0.522333
GO:0016831	carboxy-lyase activity	MF	4	11	0.0422133	0.524099
GO:0010287	plastoglobule	CC	12	57	0.042257	0.524099
GO:0052747	sinapyl alcohol dehydrogenase activity	MF	3	7	0.0425056	0.525027
GO:0004197	cysteine-type endopeptidase activity	MF	6	21	0.0426113	0.525027
GO:0045300	acyl-[acyl-carrier-protein] desaturase activity	MF	3	7	0.0431043	0.529366
GO:0006596	polyamine biosynthetic process	BP	3	7	0.0440341	0.537784
GO:0019901	protein kinase binding	MF	9	38	0.044076	0.537784
GO:0009629	response to gravity	BP	2	3	0.0445999	0.539166
GO:0070588	calcium ion transmembrane transport	BP	4	11	0.0446016	0.539166
GO:0010154	fruit development	BP	4	11	0.0451932	0.539166
GO:0046873	metal ion transmembrane transporter activity	MF	3	7	0.0453093	0.539166
GO:0031418	L-ascorbic acid binding	MF	5	17	0.0456409	0.539166
GO:0032957	inositol trisphosphate metabolic process	BP	4	11	0.0461969	0.539166
GO:0047714	galactolipase activity	MF	2	3	0.0463052	0.539166
GO:0006952	defense response	BP	90	616	0.0471189	0.539166
GO:0008395	steroid hydroxylase activity	MF	2	3	0.047337	0.539166
GO:0009978	allene oxide synthase activity	MF	2	3	0.0474838	0.539166
GO:0031407	oxylipin metabolic process	BP	2	3	0.0474838	0.539166
GO:0016630	protochlorophyllide reductase activity	MF	2	3	0.0475106	0.539166
GO:0010050	vegetative phase change	BP	2	3	0.0475938	0.539166
GO:0009694	jasmonic acid metabolic process	BP	2	3	0.0478687	0.539166
GO:0070566	adenylyltransferase activity	MF	2	3	0.0478687	0.539166
GO:0080123	jasmonate-amino synthetase activity	MF	2	3	0.0478687	0.539166
GO:0004321	fatty-acyl-CoA synthase activity	MF	2	3	0.0479458	0.539166
GO:0001676	long-chain fatty acid metabolic process	BP	2	3	0.0479626	0.539166
GO:0004315	3-oxoacyl-[acyl-carrier-protein] synthase activity	MF	2	3	0.0480188	0.539166
GO:0000239	pachytene	BP	2	3	0.0480278	0.539166
GO:0007135	meiosis II	BP	2	3	0.0480278	0.539166
GO:0051445	regulation of meiotic cell cycle	BP	2	3	0.0480278	0.539166
GO:0043201	response to leucine	BP	2	3	0.0480607	0.539166
GO:0080052	response to histidine	BP	2	3	0.0480607	0.539166
GO:0080053	response to phenylalanine	BP	2	3	0.0480607	0.539166
GO:0000914	phragmoplast assembly	BP	2	3	0.048063	0.539166
GO:0080160	selenate transport	BP	2	3	0.048063	0.539166
GO:0030599	pectinesterase activity	MF	15	86	0.0484567	0.541916
GO:0008237	metallopeptidase activity	MF	5	16	0.0486073	0.541916
GO:0016597	amino acid binding	MF	8	33	0.0487407	0.541916
GO:0015171	amino acid transmembrane transporter activity	MF	6	23	0.0495966	0.548702
GO:0015671	oxygen transport	BP	2	4	0.0496431	0.548702

## Sheet: Table3
Table 3. Gene Ontology (GO) analysis of DEGs between oswrky53-osarf18-osrr22 and osarf18-osrr22 roots under salt stress.
category	term	ontology	numDEInCat	numInCat	over_represented_pvalue	over_represented_FDR	GeneNumber(Up)	GeneNumber(Down)
GO:0055114	oxidation-reduction process	BP	85	1592	2.86328e-18	5.38011e-15	61	24
GO:0048046	apoplast	CC	34	303	7.7085e-17	9.65618e-14	30	4
GO:0020037	heme binding	MF	45	581	7.9561e-16	7.47475e-13	35	10
GO:0005618	cell wall	CC	31	390	7.75048e-12	5.82526e-09	28	3
GO:0004553	hydrolase activity, hydrolyzing O-glycosyl compounds	MF	26	278	1.83281e-11	1.14795e-08	24	2
GO:0004601	peroxidase activity	MF	21	182	2.28631e-11	1.22742e-08	21	0
GO:0005975	carbohydrate metabolic process	BP	32	431	4.63812e-11	2.17876e-08	29	3
GO:0006979	response to oxidative stress	BP	22	224	1.90973e-10	7.97419e-08	22	0
GO:0009817	defense response to fungus, incompatible interaction	BP	12	60	6.59173e-10	2.47717e-07	12	0
GO:0016036	cellular response to phosphate starvation	BP	11	55	5.78873e-09	1.89527e-06	10	1
GO:0005506	iron ion binding	MF	32	526	6.05195e-09	1.89527e-06	20	12
GO:0009651	response to salt stress	BP	21	268	4.14905e-08	1.1994e-05	20	1
GO:0005576	extracellular region	CC	17	190	6.47725e-08	1.73868e-05	16	1
GO:0004568	chitinase activity	MF	7	28	4.06218e-07	0.000101771	6	1
GO:0016705	oxidoreductase activity, acting on paired donors, with incorporation or reduction of molecular oxygen	MF	23	367	5.41374e-07	0.000127155	13	10
GO:0031012	extracellular matrix	CC	6	20	8.61181e-07	0.000190372	6	0
GO:0005507	copper ion binding	MF	18	253	1.08428e-06	0.000226374	15	3
GO:0005773	vacuole	CC	26	475	1.46356e-06	0.000289476	20	6
GO:0004497	monooxygenase activity	MF	21	336	1.99417e-06	0.000374704	11	10
GO:0009055	electron transfer activity	MF	29	604	3.13877e-06	0.000561691	18	11
GO:0006032	chitin catabolic process	BP	6	28	7.9707e-06	0.00136154	5	1
GO:0045735	nutrient reservoir activity	MF	8	60	9.82335e-06	0.00160505	7	1
GO:0008061	chitin binding	MF	5	19	1.54933e-05	0.002426	5	0
GO:0009627	systemic acquired resistance	BP	5	19	1.93613e-05	0.00276016	4	1
GO:0031982	vesicle	CC	3	4	2.05295e-05	0.00276016	0	3
GO:0090344	negative regulation of cell aging	BP	3	4	2.05295e-05	0.00276016	0	3
GO:0016020	membrane	CC	70	2287	2.05653e-05	0.00276016	42	28
GO:0030145	manganese ion binding	MF	7	49	2.34159e-05	0.00303438	7	0
GO:0009617	response to bacterium	BP	6	33	2.66219e-05	0.00333484	5	1
GO:0010073	meristem maintenance	BP	4	11	3.63199e-05	0.00440291	4	0
GO:0080167	response to karrikin	BP	10	110	4.06857e-05	0.00477803	8	2
GO:0005215	transporter activity	MF	13	186	5.46156e-05	0.00621956	10	3
GO:0080170	hydrogen peroxide transmembrane transport	BP	3	5	5.64763e-05	0.00624229	3	0
GO:0009505	plant-type cell wall	CC	13	191	7.69136e-05	0.00825833	13	0
GO:0046872	metal ion binding	MF	31	819	0.00011697	0.0118176	29	2
GO:0016021	integral component of membrane	CC	45	1331	0.000119352	0.0118176	30	15
GO:0009871	jasmonic acid and ethylene-dependent systemic resistance, ethylene mediated signaling pathway	BP	3	6	0.000119496	0.0118176	3	0
GO:0016682	oxidoreductase activity, acting on diphenols and related substances as donors, oxygen as acceptor	MF	3	6	0.000127401	0.0122763	3	0
GO:0016998	cell wall macromolecule catabolic process	BP	6	46	0.00014527	0.0136481	5	1
GO:0009409	response to cold	BP	12	183	0.000171677	0.0157356	10	2
GO:0050832	defense response to fungus	BP	6	46	0.000211677	0.01894	6	0
GO:0031418	L-ascorbic acid binding	MF	4	17	0.000224443	0.0193893	3	1
GO:0009269	response to desiccation	BP	4	17	0.000227016	0.0193893	4	0
GO:0006833	water transport	BP	3	8	0.000320008	0.0267242	3	0
GO:0030410	nicotianamine synthase activity	MF	2	2	0.000358657	0.0286773	2	0
GO:0030418	nicotianamine biosynthetic process	BP	2	2	0.000358657	0.0286773	2	0
GO:0080027	response to herbivore	BP	3	9	0.000392365	0.0307189	3	0
GO:0046274	lignin catabolic process	BP	4	21	0.000657374	0.0494083	2	2
GO:0052716	hydroquinone:oxygen oxidoreductase activity	MF	4	21	0.000657374	0.0494083	2	2
GO:0005886	plasma membrane	CC	49	1616	0.000763731	0.0562765	36	13
GO:0006623	protein targeting to vacuole	BP	3	12	0.00125613	0.0890664	0	3
GO:0015671	oxygen transport	BP	2	4	0.00152612	0.106206	2	0
GO:0047800	cysteamine dioxygenase activity	MF	3	13	0.00164637	0.110591	3	0
GO:0009624	response to nematode	BP	7	89	0.00164798	0.110591	7	0
GO:0016788	hydrolase activity, acting on ester bonds	MF	11	212	0.00179713	0.118484	9	2
GO:0009615	response to virus	BP	3	15	0.0022349	0.140143	3	0
GO:0004612	phosphoenolpyruvate carboxykinase (ATP) activity	MF	2	4	0.00223538	0.140143	2	0
GO:0009674	potassium:sodium symporter activity	MF	2	4	0.00223751	0.140143	2	0
GO:0055085	transmembrane transport	BP	18	446	0.00253282	0.156039	11	7
GO:0050660	flavin adenine dinucleotide binding	MF	9	157	0.0031987	0.193883	7	2
GO:0009908	flower development	BP	5	54	0.00356858	0.210695	3	2
GO:0071215	cellular response to abscisic acid stimulus	BP	2	5	0.0035882	0.210695	0	2
GO:0046686	response to cadmium ion	BP	14	333	0.0043493	0.248009	12	2
GO:0004806	triglyceride lipase activity	MF	5	58	0.00435567	0.248009	3	2
GO:0009664	plant-type cell wall organization	BP	4	39	0.0044747	0.250984	4	0
GO:0010466	negative regulation of peptidase activity	BP	3	20	0.0050568	0.279463	3	0
GO:0006970	response to osmotic stress	BP	3	19	0.00522466	0.284555	3	0
GO:0009737	response to abscisic acid	BP	9	174	0.00595933	0.318204	8	1
GO:0008152	metabolic process	BP	27	874	0.00607282	0.318204	16	11
GO:0022857	transmembrane transporter activity	MF	4	41	0.0060965	0.318204	4	0
GO:0016706	oxidoreductase activity, acting on paired donors, with incorporation or reduction of molecular oxygen, 2-oxoglutarate as one donor, and incorporation of one atom each of oxygen into both donors	MF	7	119	0.00646795	0.332966	4	3
GO:0030170	pyridoxal phosphate binding	MF	7	114	0.00666905	0.338679	7	0
GO:0006817	phosphate ion transport	BP	3	21	0.00695207	0.348345	2	1
GO:0006629	lipid metabolic process	BP	11	250	0.00719486	0.355767	9	2
GO:0009744	response to sucrose	BP	3	22	0.00741689	0.361983	0	3
GO:0006094	gluconeogenesis	BP	2	7	0.00752672	0.362634	2	0
GO:0004364	glutathione transferase activity	MF	2	8	0.00807253	0.384007	2	0
GO:0019825	oxygen binding	MF	2	8	0.00826419	0.38821	2	0
GO:0008970	phospholipase A1 activity	MF	2	8	0.00945442	0.438638	2	0
GO:0042973	glucan endo-1,3-beta-D-glucosidase activity	MF	2	8	0.00964637	0.442086	2	0
GO:0009247	glycolipid biosynthetic process	BP	2	8	0.00985906	0.44639	2	0
GO:0010262	somatic embryogenesis	BP	2	9	0.0102029	0.456457	2	0
GO:0005783	endoplasmic reticulum	CC	11	263	0.0115376	0.510097	7	4
GO:0008200	ion channel inhibitor activity	MF	1	1	0.0122283	0.528208	1	0
GO:0009405	pathogenesis	BP	1	1	0.0122283	0.528208	1	0
GO:0009800	cinnamic acid biosynthetic process	BP	2	9	0.0125782	0.531109	0	2
GO:0045548	phenylalanine ammonia-lyase activity	MF	2	9	0.0125782	0.531109	0	2
GO:0055069	zinc ion homeostasis	BP	2	10	0.0142941	0.595764	2	0
GO:0006073	cellular glucan metabolic process	BP	3	28	0.0144264	0.595764	3	0
GO:0051093	negative regulation of developmental process	BP	1	1	0.0147617	0.602983	1	0
GO:0004556	alpha-amylase activity	MF	2	10	0.0150405	0.607765	2	0
GO:0006559	L-phenylalanine catabolic process	BP	2	10	0.0155204	0.620484	0	2
GO:0016762	xyloglucan:xyloglucosyl transferase activity	MF	3	29	0.0158855	0.622873	3	0
GO:0051707	response to other organism	BP	3	29	0.0159116	0.622873	2	1
GO:0022900	electron transport chain	BP	6	113	0.0172614	0.645307	6	0
GO:0080161	auxin transmembrane transporter activity	MF	1	1	0.0181728	0.645307	0	1
GO:0080162	intracellular auxin transport	BP	1	1	0.0181728	0.645307	0	1
GO:0005547	phosphatidylinositol-3,4,5-trisphosphate binding	MF	1	1	0.0182199	0.645307	1	0
GO:0080025	phosphatidylinositol-3,5-bisphosphate binding	MF	1	1	0.0182199	0.645307	1	0
GO:0009910	negative regulation of flower development	BP	3	30	0.0187383	0.645307	0	3
GO:0016639	oxidoreductase activity, acting on the CH-NH2 group of donors, NAD or NADP as acceptor	MF	1	1	0.019129	0.645307	0	1
GO:0010328	auxin influx transmembrane transporter activity	MF	1	1	0.0192842	0.645307	1	0
GO:0060919	auxin influx	BP	1	1	0.0192842	0.645307	1	0
GO:0006865	amino acid transport	BP	1	1	0.0194713	0.645307	0	1
GO:0047251	thiohydroximate beta-D-glucosyltransferase activity	MF	1	1	0.0194969	0.645307	0	1
GO:0016847	1-aminocyclopropane-1-carboxylate synthase activity	MF	1	1	0.0195265	0.645307	1	0
GO:0004637	phosphoribosylamine-glycine ligase activity	MF	1	1	0.0195322	0.645307	1	0
GO:0034051	negative regulation of plant-type hypersensitive response	BP	1	1	0.0195666	0.645307	1	0
GO:0045595	regulation of cell differentiation	BP	1	1	0.0195666	0.645307	1	0
GO:0032441	pheophorbide a oxygenase activity	MF	1	1	0.0195756	0.645307	1	0
GO:0001561	fatty acid alpha-oxidation	BP	1	1	0.0195756	0.645307	1	0
GO:0050242	pyruvate, phosphate dikinase activity	MF	1	1	0.0195756	0.645307	1	0
GO:0009416	response to light stimulus	BP	4	57	0.0222471	0.726995	3	1
GO:0051119	sugar transmembrane transporter activity	MF	2	15	0.0257918	0.832974	1	1
GO:0042631	cellular response to water deprivation	BP	2	14	0.0259335	0.832974	1	1
GO:0042742	defense response to bacterium	BP	6	126	0.0307555	0.979485	5	1
GO:0008762	UDP-N-acetylmuramate dehydrogenase activity	MF	3	37	0.0322349	0.997885	3	0
GO:0008429	phosphatidylethanolamine binding	MF	1	2	0.0346244	0.997885	0	1
GO:0004451	isocitrate lyase activity	MF	1	2	0.0349891	0.997885	1	0
GO:0043167	ion binding	MF	2	17	0.0358082	0.997885	2	0
GO:0015200	methylammonium transmembrane transporter activity	MF	1	2	0.0361442	0.997885	1	0
GO:0072489	methylammonium transmembrane transport	BP	1	2	0.0361442	0.997885	1	0
GO:0009815	1-aminocyclopropane-1-carboxylate oxidase activity	MF	1	2	0.0376061	0.997885	1	0
GO:0009835	fruit ripening	BP	1	2	0.0376061	0.997885	1	0
GO:0010411	xyloglucan metabolic process	BP	1	2	0.0377372	0.997885	1	0
GO:0004459	L-lactate dehydrogenase activity	MF	1	2	0.0380262	0.997885	1	0
GO:0008425	2-polyprenyl-6-methoxy-1,4-benzoquinone methyltransferase activity	MF	1	2	0.0381872	0.997885	1	0
GO:0004629	phospholipase C activity	MF	1	2	0.0384559	0.997885	1	0
GO:0009395	phospholipid catabolic process	BP	1	2	0.0384559	0.997885	1	0
GO:0050269	coniferyl-aldehyde dehydrogenase activity	MF	1	2	0.0385329	0.997885	1	0
GO:0052638	indole-3-butyrate beta-glucosyltransferase activity	MF	1	2	0.0385621	0.997885	0	1
GO:0070301	cellular response to hydrogen peroxide	BP	1	2	0.0385621	0.997885	0	1
GO:0071475	cellular hyperosmotic salinity response	BP	1	2	0.0385621	0.997885	0	1
GO:0040009	regulation of growth rate	BP	1	2	0.038601	0.997885	0	1
GO:0046622	positive regulation of organ growth	BP	1	2	0.038601	0.997885	0	1
GO:0005275	amine transmembrane transporter activity	MF	1	2	0.0386661	0.997885	0	1
GO:0006164	purine nucleotide biosynthetic process	BP	1	2	0.0387233	0.997885	1	0
GO:0004022	alcohol dehydrogenase (NAD) activity	MF	1	2	0.038745	0.997885	0	1
GO:0046510	UDP-sulfoquinovose:DAG sulfoquinovosyltransferase activity	MF	1	2	0.0387576	0.997885	1	0
GO:0033907	beta-D-fucosidase activity	MF	1	2	0.0387615	0.997885	1	0
GO:0047513	1,2-alpha-L-fucosidase activity	MF	1	2	0.0387647	0.997885	1	0
GO:0016040	glutamate synthase (NADH) activity	MF	1	2	0.0387683	0.997885	1	0
GO:0016174	NAD(P)H oxidase activity	MF	1	2	0.0387683	0.997885	1	0
GO:0009705	plant-type vacuole membrane	CC	3	39	0.0390489	0.998269	3	0
GO:0009723	response to ethylene	BP	3	40	0.039499	1	3	0
GO:0016165	linoleate 13S-lipoxygenase activity	MF	2	17	0.0408502	1	2	0
GO:0048544	recognition of pollen	BP	6	135	0.0427358	1	3	3
GO:0003682	chromatin binding	MF	11	330	0.043761	1	5	6
GO:0000272	polysaccharide catabolic process	BP	2	19	0.0448145	1	2	0
GO:0010197	polar nucleus fusion	BP	2	18	0.0454828	1	2	0
GO:0010043	response to zinc ion	BP	3	43	0.0463369	1	3	0
GO:0009860	pollen tube growth	BP	4	71	0.0472658	1	1	3
GO:0010507	negative regulation of autophagy	BP	1	3	0.0484059	1	0	1
LOC_Os04g27060	-1.96906	4.02699068055538e-173	7.90225474450145e-171
LOC_Os01g73110	-3.32794	4.58402654246749e-173	8.93767636639047e-171
LOC_Os01g01710	1.41604780466347	5.75064257244775e-173	1.11408627059599e-170
LOC_Os06g40080	-1.40832	3.54296118818687e-172	6.82042452530961e-170
LOC_Os07g03730	2.87945480445304	9.16591788252918e-172	1.75339973783024e-169
LOC_Os03g13140	3.39867060623453	6.50475292265613e-171	1.23655353059693e-168
LOC_Os05g47700	1.14627125152321	3.59024632451772e-170	6.78266659667894e-168
LOC_Os07g48060	-2.21392	5.5515431522926e-170	1.04231936123538e-167
LOC_Os01g68740	-1.74547	6.93737615555932e-170	1.29452290274535e-167
LOC_Os11g02100	-2.17656	3.48598008691199e-169	6.46521770265335e-167
LOC_Os02g37250	-1.04791	6.91414075349881e-169	1.27454851611164e-166
LOC_Os08g26870	-1.34269	8.12088855065323e-169	1.48798160335342e-166
LOC_Os02g15560	-2.38607	1.56953207822283e-168	2.85861602941471e-166
LOC_Os06g30480	-2.46366	1.95929048497434e-168	3.54724877327259e-166
LOC_Os04g53740	-1.52634	4.5461425594593e-167	8.18198059695349e-165
LOC_Os09g20990	-1.07211	1.36086572486709e-166	2.43482893456219e-164
LOC_Os07g32710	9.44677651276928	1.90758818799991e-166	3.39305276761435e-164
LOC_Os08g04540	1.39408986925286	2.81465886117518e-164	4.9773641814828e-162
LOC_Os02g07260	1.19032853889382	1.7825163643646e-163	3.13393166118575e-161
LOC_Os10g08550	0.866368887193556	2.66932126972595e-163	4.66609630689567e-161
LOC_Os08g37960	-1.40932	4.39355021591924e-163	7.63624133527998e-161
LOC_Os01g73940	-1.62812	7.53999408323218e-163	1.30304806838403e-160
LOC_Os03g55070	1.47592271019722	5.12029270741004e-162	8.79880355867705e-160
LOC_Os02g10290	-1.25099	3.20923597306631e-161	5.483827042516e-159
LOC_Os09g31080	1.32199626420888	3.05159184890512e-158	5.18531942325688e-156
LOC_Os08g35860	-1.71145	4.25587204733076e-158	7.19147801064513e-156
LOC_Os08g06380	1.85051211471484	6.60286352870883e-158	1.10957291209507e-155
LOC_Os04g10010	1.5915254578475	1.28912288777978e-157	2.15439350300603e-155
LOC_Os06g50230	-2.08567	9.11019436346378e-156	1.51418399868369e-153
LOC_Os05g32110	1.58187312671446	9.2419714252004e-156	1.52773805907008e-153
LOC_Os12g42876	1.08561786586448	1.27662017817824e-154	2.09890158591725e-152
LOC_Os01g04620	-1.68981	3.86161174710972e-154	6.31477327419835e-152
LOC_Os09g38030	1.25413694756659	7.16500749055915e-153	1.16540571033608e-150
LOC_Os04g51920	-2.66194	4.09186768231401e-152	6.62011954389697e-150
LOC_Os02g32009	-1.02633	1.71597155108192e-150	2.76153389934962e-148
LOC_Os06g05100	-1.26737	3.44547736551081e-150	5.51566523944089e-148
LOC_Os08g03290	0.884349852897564	1.52006937712652e-149	2.42065079448588e-147
LOC_Os05g48040	-1.72718	2.21732083555632e-149	3.5126057569938e-147
LOC_Os11g05820	-1.74818	3.18024540776135e-148	5.01193493898804e-146
LOC_Os02g26700	-1.07294	4.26053945377403e-148	6.67982309412325e-146
LOC_Os08g30790	-1.33937	4.96895788436349e-148	7.75055502619486e-146
LOC_Os08g37370	1.96861769594349	6.26289282633551e-148	9.71898715335821e-146
LOC_Os04g48270	-1.85176	1.10742738731633e-147	1.70982291434586e-145
LOC_Os04g50970	-1.17205	1.41472302480545e-146	2.17324320820619e-144
LOC_Os03g48380	-1.39839	3.90862862157858e-146	5.97411297255951e-144
LOC_Os01g07970	-1.63357	4.57037176388209e-146	6.95062137851189e-144
LOC_Os05g15770	-1.09305	8.10118238666919e-146	1.22589832573597e-143
LOC_Os01g54670	-1.85072	1.15133976776121e-145	1.73362130575371e-143
LOC_Os08g35190	-1.61128	9.20345359690766e-145	1.37897657440169e-142
LOC_Os03g08490	-1.75797	1.1102653371459e-144	1.65538384777596e-142
LOC_Os06g39370	-2.62731	2.80673506846184e-143	4.16437335816271e-141
LOC_Os11g40690	1.18587029651735	3.18751136312722e-143	4.70637600101348e-141
LOC_Os03g50490	-2.41405	3.52981741920837e-143	5.18661481268801e-141
LOC_Os01g63690	-1.52984	6.2276842904493e-143	9.10679064318778e-141
LOC_Os01g66120	-0.985032	7.10680665564336e-143	1.03426139348349e-140
LOC_Os01g02200	-1.38904	1.4022076934121e-142	2.03093091442012e-140
LOC_Os05g48900	2.01502322696035	1.30704704545e-141	1.88412999689134e-139
LOC_Os03g52630	1.54500815253477	1.88913445783077e-141	2.71037328629154e-139
LOC_Os01g69920	-0.97769	2.00098951925002e-141	2.85737545622106e-139
LOC_Os12g25090	-1.1517	2.04048255825613e-141	2.90015502298684e-139
LOC_Os09g26880	-0.929649	1.26873272765109e-140	1.79487323926676e-138
LOC_Os02g37160	-1.56585	3.96965542911519e-140	5.5898629412948e-138
LOC_Os04g40950	1.15806694810283	5.88871587831011e-140	8.25397152786545e-138
LOC_Os03g50160	-1.47012	6.86880941106183e-140	9.58356454343379e-138
LOC_Os05g01820	1.03076958391059	2.99799589628873e-139	4.16379192609672e-137
LOC_Os03g57690	-1.04883	2.10667270001291e-138	2.91257076561785e-136
LOC_Os01g54480	-1.42062	3.1356366099698e-138	4.31554403297925e-136
LOC_Os02g48720	1.01468846540581	5.72256006063212e-138	7.84042282901741e-136
LOC_Os07g47400	-2.56151	5.06435551113017e-137	6.90750839580875e-135
LOC_Os01g64700	-1.03227	3.09132250603297e-136	4.19757434569191e-134
LOC_Os05g37170	-2.21781	1.634334621685e-135	2.20932986014093e-133
LOC_Os03g50480	1.12170372489755	2.76644803594455e-135	3.72319838324289e-133
LOC_Os10g32940	-3.49243	1.68151457281244e-134	2.25308137650499e-132
LOC_Os11g31550	-1.68129	3.24286149287841e-134	4.32609101611359e-132
LOC_Os05g50750	1.29556044158466	2.47421025999207e-133	3.28626983702702e-131
LOC_Os02g11000	-2.19503	2.79611254682713e-132	3.69767648801278e-130
LOC_Os01g38110	2.44370507889794	3.28992827965202e-132	4.33188132267948e-130
LOC_Os01g59930	1.35295076170379	9.98390150311199e-132	1.30892391430454e-129
LOC_Os03g28330	1.23863098234692	2.13643847296639e-131	2.78892328728523e-129
LOC_Os02g15550	-0.904891	1.97900118893813e-130	2.57236325481804e-128
LOC_Os03g52170	1.14035553222653	2.14127726519423e-130	2.77145060843182e-128
LOC_Os03g10620	-1.02227	2.72300136716405e-130	3.50944108405347e-128
LOC_Os06g39120	-0.814136	3.45859817170854e-130	4.43868025277161e-128
LOC_Os04g53850	-1.28379	6.59403739622167e-130	8.42706896821338e-128
LOC_Os01g54340	-2.232	4.05316053109838e-129	5.15819793781959e-127
LOC_Os06g20790	1.37241943587512	4.57855888250745e-129	5.80256029043111e-127
LOC_Os05g34070	-0.930398	6.98896668078398e-129	8.82059794866081e-127
LOC_Os04g32920	1.66377627283457	1.20107581529626e-128	1.50958355363847e-126
LOC_Os01g49310	-1.13615	1.87062723905527e-127	2.34144025115658e-125
LOC_Os11g26860	0.925680758896712	3.01546139884729e-127	3.75894565194013e-125
LOC_Os05g07940	-1.14643	3.18809700312315e-127	3.95792483457117e-125
LOC_Os04g59000	-1.30606	5.3439464150959e-127	6.60737699843727e-125
LOC_Os03g06390	-1.5183	5.93347234854805e-127	7.30657874305415e-125
LOC_Os01g18050	1.50344246454411	1.12480619689263e-126	1.37952037438251e-124
LOC_Os03g13050	-2.17391	1.51626142359412e-125	1.85215291004171e-123
LOC_Os05g37950	-1.34901	4.43653361019445e-125	5.39766425150698e-123
LOC_Os04g57300	-1.0938	9.03809936655308e-125	1.09523039973338e-122
LOC_Os05g08420	-1.56006	9.38757893351049e-125	1.13306587635577e-122
LOC_Os10g28350	1.25925076174918	1.2024073939174e-124	1.44555032780205e-122
LOC_Os03g60080	-1.47694	2.55384945704525e-124	3.05818445218458e-122
LOC_Os06g48960	1.13141055096633	1.91138275300798e-123	2.27986736531336e-121
LOC_Os02g36140	1.15243275142746	2.60020905093586e-123	3.08937337864317e-121
LOC_Os03g16860	0.977224400642471	1.23179686994542e-122	1.45783399207237e-120
LOC_Os05g34770	1.13217062709361	3.02067072462342e-122	3.56111320775759e-120
LOC_Os04g40990	-1.39655	6.6681946667425e-122	7.83088065573899e-120
LOC_Os05g05680	1.3615656114342	1.13683116751669e-121	1.32991756889183e-119
LOC_Os03g08500	-1.43327	1.38464593317475e-121	1.61361650204763e-119
LOC_Os01g25484	1.11735991242966	1.16262077730787e-120	1.34970509780901e-118
LOC_Os02g16000	-1.30321	1.39314055794244e-120	1.61116970381662e-118
LOC_Os06g25010	-2.72655	2.10880426418986e-120	2.4295981249848e-118
LOC_Os04g10160	1.18864200910534	2.32115284483727e-120	2.66415792183285e-118
LOC_Os04g10000	1.52624160660201	1.17655791984013e-119	1.34534532668637e-117
LOC_Os01g42410	0.905655573633438	9.4522999325159e-119	1.07678335111387e-116
LOC_Os12g41250	-1.40628	2.19559424879088e-118	2.49183562206057e-116
LOC_Os09g12290	2.16109663531695	5.13955545774023e-118	5.81132783652888e-116
LOC_Os02g39620	2.05843373469732	1.28218079817115e-117	1.44440041322865e-115
LOC_Os06g36560	-1.04677	2.13639758813589e-117	2.39781066571001e-115
LOC_Os02g07160	-1.79632	3.03220841045284e-116	3.39072246368874e-114
LOC_Os07g48100	0.954278461433526	8.32269381712288e-116	9.27263938247654e-114
LOC_Os01g13610	1.18196428781022	1.461814457712e-115	1.62272074984556e-113
LOC_Os11g44950	-1.88572	4.39905455954763e-115	4.86551430848002e-113
LOC_Os02g43500	-1.11061	3.04984448435707e-114	3.36101702305089e-112
LOC_Os07g23944	-0.978748	2.16814360502609e-113	2.38073125958388e-111
LOC_Os06g43860	-1.23446	5.48961463750233e-113	6.00619132425435e-111
LOC_Os05g33380	1.19880468529831	7.53017535388236e-113	8.20924062952279e-111
LOC_Os02g02410	0.942851359117112	1.01019353604638e-112	1.09735880687095e-110
LOC_Os05g34830	-2.36222	2.12636074397431e-112	2.30161524515027e-110
LOC_Os09g04160	-1.29178	3.11555806803337e-112	3.36038348217386e-110
LOC_Os10g25130	0.937215025429917	3.91266045188974e-112	4.20521131818652e-110
LOC_Os04g42930	-1.04565	7.62407860631965e-112	8.16528080597953e-110
LOC_Os04g46390	-0.847681	1.10938821247278e-111	1.18397024107271e-109
LOC_Os10g05069	-0.888425	1.12682438084447e-111	1.1983737890827e-109
LOC_Os08g04180	0.994435725959861	1.37592174419962e-111	1.45818939970647e-109
LOC_Os02g42020	-1.00511	2.72982241661014e-111	2.88299578554215e-109
LOC_Os04g42470	-1.06127	5.17341632084988e-111	5.4447969140128e-109
LOC_Os03g46470	-2.22163	6.2156574203307e-111	6.51915296885443e-109
LOC_Os05g48390	-0.791747	2.11797073021866e-110	2.21375249932408e-108
LOC_Os01g03870	-2.06449	2.19195659545567e-110	2.28323807559519e-108
LOC_Os01g41900	-1.3919	3.81440854616576e-110	3.95969455085931e-108
LOC_Os11g05190	-1.28435	4.0843501556313e-110	4.22549640590753e-108
LOC_Os02g52860	0.975885750111167	4.72867644970201e-110	4.87550586081818e-108
LOC_Os05g43060	-0.957183	5.18590521616022e-110	5.32886800860572e-108
LOC_Os11g10480	1.51443859198272	5.43258671384314e-110	5.5635541241836e-108
LOC_Os01g70170	0.753827239631887	7.30534880441989e-110	7.43604285200884e-108
LOC_Os04g45970	-1.01489	7.30989220394083e-110	7.43604285200884e-108
LOC_Os01g65920	-1.20702	9.27902705697749e-110	9.40769623216758e-108
LOC_Os01g37920	1.47558627270505	1.4737162598296e-109	1.48918783252415e-107
LOC_Os01g43480	-1.13569	2.72217315676325e-109	2.74164300450699e-107
LOC_Os02g39970	-1.05474	4.59986127967834e-109	4.61747130965994e-107
LOC_Os01g13210	-0.962336	5.76430345115339e-109	5.76733729507505e-107
LOC_Os02g36190	1.21490900136884	9.86028840320872e-109	9.83313219908185e-107
LOC_Os05g40420	1.34518733640667	1.36143250506173e-108	1.35324611352803e-106
LOC_Os07g40130	1.86806894722365	2.54852043847336e-108	2.52494454907511e-106
LOC_Os10g40700	1.52635790864622	2.08893109479423e-107	2.06288727854744e-105
LOC_Os03g16980	0.909268521411757	3.73298367647548e-107	3.67451234639735e-105
LOC_Os02g51440	2.96738942405315	6.71507149048906e-107	6.58856820821662e-105
LOC_Os05g41060	-0.850359	2.66243572564894e-106	2.60387926145782e-104
LOC_Os06g41930	-1.14643	4.79809032964483e-106	4.67752293161786e-104
LOC_Os06g24190	-2.16459	7.67437910789127e-106	7.45763306535529e-104
LOC_Os07g09060	-0.899985	2.33849547620803e-105	2.26521268803642e-103
LOC_Os08g04560	1.44432295676541	4.52617517727029e-105	4.37041727593185e-103
LOC_Os02g44820	-2.09131	6.25736899532599e-105	6.02291567600745e-103
LOC_Os06g04270	0.881186237405422	9.38840280946822e-105	9.00812807106579e-103
LOC_Os09g26420	1.69024378985785	1.26948393531318e-104	1.21423343951213e-102
LOC_Os07g26440	1.46967740221571	1.58637408404868e-104	1.51257536490359e-102
LOC_Os04g55720	0.917089393283748	1.88478557072831e-104	1.79148868497726e-102
LOC_Os02g01510	1.54122550105717	3.35246622545503e-104	3.17659229636885e-102
LOC_Os04g57220	-0.761884	4.10028419664329e-104	3.87311317158703e-102
LOC_Os11g06150	-1.19711	4.23306298304521e-104	3.98615615146449e-102
LOC_Os08g34720	1.1343622341502	5.43029339988193e-104	5.09777172996324e-102
LOC_Os12g04204	-1.04139	1.3597333038492e-103	1.27254302061161e-101
LOC_Os08g43550	-1.4088	2.81404987999609e-103	2.62552580214605e-101
LOC_Os07g06860	-2.33298	6.88043792093887e-103	6.39985932120112e-101
LOC_Os02g08120	-1.05995	2.59682914044324e-102	2.40808399804029e-100
LOC_Os09g27500	-1.88259	3.86693836676169e-102	3.57497864326516e-100
LOC_Os06g48510	-1.85536	7.26663844374838e-102	6.69763863348639e-100
LOC_Os03g53150	1.60127012295373	7.42065113002111e-102	6.81892824080731e-100
LOC_Os06g14740	-1.11274	1.84354834661249e-101	1.68895682260739e-99
LOC_Os09g36580	-2.47178	6.58164514076668e-101	6.01163118923602e-99
LOC_Os01g03370	1.65230670748153	6.67175741207037e-101	6.0756938157345e-99
LOC_Os02g36940	-1.45464	9.66602093557464e-101	8.77616993362502e-99
LOC_Os05g10754	-1.5514	1.09303218364262e-100	9.8945437195458e-99
LOC_Os03g27310	-0.907786	1.36048779931824e-100	1.22791088736094e-98
LOC_Os01g27390	-1.54818	2.14450209386737e-100	1.92979809725059e-98
LOC_Os12g30824	1.61156638950118	2.45324404606051e-100	2.20111713584001e-98
LOC_Os09g30458	-1.95771	6.64252866216634e-100	5.94232799377798e-98
LOC_Os07g08950	-1.18689	8.35882086082158e-100	7.4557740557991e-98
LOC_Os09g36300	-0.766772	8.43624575866587e-100	7.50283190045559e-98
LOC_Os05g05610	-1.55434	9.09228969233857e-100	8.06271379831399e-98
LOC_Os03g27230	1.15841693615379	1.41039253648181e-99	1.24704940086136e-97
LOC_Os07g03580	1.60874120855435	2.73889467706171e-99	2.41467305789881e-97
LOC_Os08g44360	-2.06252	2.83197826648692e-99	2.48952170385741e-97
LOC_Os04g02120	-0.949671	3.17336064806111e-99	2.78158321243304e-97
LOC_Os05g33570	0.938619176381587	3.97524877659649e-99	3.47445881577468e-97
LOC_Os03g15780	1.07032686057003	5.51928639924137e-99	4.81016089167122e-97
LOC_Os05g05060	-1.08281	1.71963431060566e-98	1.49441134832519e-96
LOC_Os10g32550	1.4673322408276	3.28988672685079e-98	2.85086024740437e-96
LOC_Os02g04450	-1.09204	5.7728322364655e-98	4.98825185523678e-96
LOC_Os05g33140	1.73620278759301	6.49773091987599e-98	5.59872474954528e-96
LOC_Os09g31478	-1.00107	2.39033854510691e-97	2.05380048553592e-95
LOC_Os06g39110	-1.01389	3.02805623141389e-97	2.59440446013197e-95
LOC_Os03g64140	-1.73248	5.98339069844679e-97	5.11210144617858e-95
LOC_Os09g21230	-0.788084	6.68626575712557e-97	5.69662350892805e-95
LOC_Os03g60840	-1.69306	8.03437901194437e-97	6.82608022422626e-95
LOC_Os01g68730	-1.06678	8.7248566132008e-97	7.39206793167453e-95
LOC_Os06g50930	-1.59484	1.04973251500066e-96	8.86907338229445e-95
LOC_Os11g39220	-1.15664	1.09680431318092e-96	9.24110803039083e-95
LOC_Os05g37470	-2.12031	1.20242535004888e-96	1.01030302340019e-94
LOC_Os07g42650	-1.25313	1.34888368546162e-96	1.13023818669423e-94
LOC_Os02g50240	0.971875483460534	1.62006372240689e-96	1.35373236760241e-94
LOC_Os02g27400	-0.931564	9.45143640702148e-96	7.87602437687576e-94
LOC_Os01g67220	1.29441576617125	1.56345226827253e-95	1.2992886391196e-93
LOC_Os02g50350	-0.909921	2.07770044262435e-95	1.72194377827963e-93
LOC_Os01g52920	-0.992365	3.69144252250079e-95	3.0510574935974e-93
LOC_Os04g40874	1.14318588629346	9.29984691134269e-95	7.66569495001082e-93
LOC_Os12g24320	-1.4108	1.33492045948199e-94	1.09737677555687e-92
LOC_Os01g21160	-1.17591	2.5971521109763e-94	2.1292447064004e-92
LOC_Os04g55230	1.20364966485422	2.78571395761322e-94	2.27769558426784e-92
LOC_Os01g55940	1.6663484257971	3.08164795115031e-94	2.51290627566187e-92
LOC_Os05g47780	-1.13289	4.36298298570037e-94	3.54824840890541e-92
LOC_Os03g15020	-1.30279	6.15949571310164e-94	4.99592590959198e-92
LOC_Os09g04440	-1.25281	9.14850842562405e-94	7.40055936898354e-92
LOC_Os01g60190	0.774542569639488	6.30044812605381e-93	5.08314138466983e-91
LOC_Os03g52390	-0.890746	1.54010285624946e-92	1.23925313427734e-90
LOC_Os02g52730	4.7293819450415	2.59590745957185e-92	2.08330135330706e-90
LOC_Os02g02780	-0.883532	3.97939515728395e-92	3.18519166063023e-90
LOC_Os03g63390	-1.20899	4.18121063513847e-92	3.33794495218824e-90
LOC_Os03g08480	-1.54642	7.36453017158585e-92	5.86386255756427e-90
LOC_Os07g44060	1.13083554445967	9.94762715937422e-92	7.89992239372131e-90
LOC_Os02g13850	-1.27781	1.05426347040175e-91	8.35064523847384e-90
LOC_Os05g04630	-0.63531	1.39515082740991e-91	1.10220539133766e-89
LOC_Os05g01810	2.05637180732012	2.32331603296871e-91	1.83072488235172e-89
LOC_Os02g53790	1.67261987155801	2.94182158323128e-91	2.31210452908431e-89
LOC_Os10g40360	-1.41523	6.59406754718499e-91	5.16920511637058e-89
LOC_Os07g23640	-0.624873	7.50123506024475e-91	5.86523304864793e-89
LOC_Os01g68589	2.1831496184982	7.69727133880628e-91	6.00308218054184e-89
LOC_Os01g73000	-1.13893	1.20299822601252e-90	9.35815704409129e-89
LOC_Os03g36550	4.7795893778802	1.7766069549796e-90	1.37850196792499e-88
LOC_Os09g39940	1.24127011889654	1.93775847536768e-90	1.49971658490543e-88
LOC_Os02g41590	0.802737905128891	2.36220355210773e-90	1.82357317870327e-88
LOC_Os05g33040	-1.58626	7.66091276098671e-90	5.89909677311827e-88
LOC_Os08g03610	-4.08956	2.59519914328246e-89	1.99332265510301e-87
LOC_Os11g14220	0.875119177120325	4.72268844073338e-89	3.61826931015986e-87
LOC_Os07g41350	3.04595612886883	1.06543630906723e-88	8.14228913984648e-87
LOC_Os01g59150	1.64996776476022	1.09618302465322e-88	8.35626638542667e-87
LOC_Os04g50120	-1.10472	1.1460475460723e-88	8.71454554033377e-87
LOC_Os08g06100	0.809630486753927	5.93089727958157e-88	4.49860777196392e-86
LOC_Os07g08430	0.856836462487569	6.26771801145924e-88	4.74226146857075e-86
LOC_Os07g09340	-0.85805	6.54341211296203e-88	4.93857128605094e-86
LOC_Os01g01340	-1.64318	2.86963920839731e-87	2.1604689644211e-85
LOC_Os04g35520	0.811124107696901	3.04452829296717e-87	2.28647833478739e-85
LOC_Os07g03180	-1.28324	3.07964721700353e-87	2.30715639784186e-85
LOC_Os10g22520	-1.18223	3.70718438449758e-87	2.7704599567292e-85
LOC_Os08g29720	-1.00942	5.22880209071816e-87	3.89802069586479e-85
LOC_Os01g74300	1.98704421735067	5.25007209124856e-87	3.90430789064588e-85
LOC_Os03g58890	1.49116746203788	7.12026472171142e-87	5.2821944335506e-85
LOC_Os07g07680	-0.900147	1.59898798018112e-86	1.1833289149681e-84
LOC_Os01g64350	-1.14667	1.93025375452245e-86	1.42501451935813e-84
LOC_Os03g25790	-1.73864	2.20032422686178e-86	1.62046154199099e-84
LOC_Os08g33720	1.42356436131153	2.26386571446608e-86	1.66323042442513e-84
LOC_Os07g39270	0.967696676452106	6.54366584635367e-86	4.79595518994442e-84
LOC_Os02g03040	-0.92988	7.71273148687932e-86	5.63919329098369e-84
LOC_Os04g32950	0.692958095387834	2.47257059327438e-85	1.80349417661951e-83
LOC_Os05g11780	0.973337204607323	2.98743359952202e-85	2.17382249672396e-83
LOC_Os01g09620	-1.63312	3.51760414674426e-85	2.55349517249101e-83
LOC_Os03g20370	1.04622371184293	6.12366171355712e-85	4.42779141425693e-83
LOC_Os11g45400	2.07246970641527	6.12868288204289e-85	4.42779141425693e-83
LOC_Os02g05692	-1.24451	8.69654893018453e-85	6.26810976920598e-83
LOC_Os02g48360	2.15455015221932	1.62785860834778e-84	1.17051885180865e-82
LOC_Os02g36530	-1.40898	1.64573840573006e-84	1.18058441860107e-82
LOC_Os08g38900	1.05557496056221	3.53179336540905e-84	2.5276006353478e-82
LOC_Os02g35470	-0.839197	5.70169406376724e-84	4.07095602449635e-82
LOC_Os04g59190	-0.809966	5.81771900330744e-84	4.14406888066977e-82
LOC_Os05g04490	1.10197754667265	8.60609123568823e-84	6.11595493048348e-82
LOC_Os10g30850	-1.08921	1.20645941123834e-83	8.55376910308281e-82
LOC_Os02g25780	-1.75881	1.84874723417061e-83	1.30770920638449e-81
LOC_Os08g34170	-1.56449	2.42457059840047e-83	1.71103803528884e-81
LOC_Os04g24170	-1.06611	3.81543068302257e-83	2.68634582534292e-81
LOC_Os05g47670	-1.37749	1.03752773793444e-82	7.28809322794776e-81
LOC_Os05g09440	1.6647061008441	1.28003063708567e-82	8.97083222525294e-81
LOC_Os06g46140	-2.02466	1.68922466698101e-82	1.1811369533539e-80
LOC_Os01g06640	-1.1693	6.34578264447443e-82	4.4269111218884e-80
LOC_Os04g34180	-1.74245	8.28365580293518e-82	5.76557608471571e-80
LOC_Os06g46366	-1.2672	8.45717451641893e-82	5.87290913450681e-80
LOC_Os08g42550	-1.34399	1.11824839845155e-81	7.74775473514857e-80
LOC_Os04g51880	-0.998275	1.23219111431106e-81	8.51780112111029e-80
LOC_Os11g02379	-3.80119	1.59568905654339e-81	1.1005550644858e-79
LOC_Os10g32540	-1.32595	1.64670738804943e-81	1.13317312024687e-79
LOC_Os02g51110	-0.682036	1.76512128283391e-81	1.21191713179856e-79
LOC_Os03g31550	-1.11909	2.59705394250376e-81	1.7790989350269e-79
LOC_Os05g41990	1.78012784249091	3.25656125298558e-81	2.22587791170358e-79
LOC_Os04g01470	1.43654531191271	4.02346574362841e-81	2.74389538247089e-79
LOC_Os06g48500	-2.01087	4.06221222355086e-81	2.76412185663362e-79
LOC_Os12g42860	0.975355184724129	4.24902429357601e-81	2.88478399360285e-79
LOC_Os01g18744	1.41517854152158	4.26420865783219e-81	2.88864522353282e-79
LOC_Os07g44740	1.37466458939789	4.57911269641479e-81	3.09507315053671e-79
LOC_Os03g50885	1.10606496547039	5.31647081082054e-81	3.58549392864562e-79
LOC_Os03g62090	1.36004645962366	5.81819417772286e-81	3.91518128561103e-79
LOC_Os07g14270	0.636273857454766	6.23685053102769e-81	4.18763897906707e-79
LOC_Os08g31810	-0.905219	6.67065863894604e-81	4.4690474264798e-79
LOC_Os10g37210	-1.18221	1.00732417181573e-80	6.73379604614226e-79
LOC_Os02g01560	0.909964363068237	1.06872954620302e-80	7.12861356958577e-79
LOC_Os10g02630	-0.769981	1.82087643959372e-80	1.21189885747664e-78
LOC_Os02g02830	-1.79826	2.55206450697105e-80	1.69483829790462e-78
LOC_Os08g44590	1.74337795620846	3.81759298269822e-80	2.52975834775052e-78
LOC_Os08g38710	-1.35344	1.13285360188197e-79	7.49062503366129e-78
LOC_Os04g38950	1.02421192341328	1.1699076736784e-79	7.71885288559701e-78
LOC_Os03g15230	-1.80617	1.34526878452259e-79	8.85664401515999e-78
LOC_Os02g07450	-1.50384	3.42637120560625e-79	2.2508964706203e-77
LOC_Os12g44360	-0.745016	3.58761605002908e-79	2.3517441762432e-77
LOC_Os12g33610	-3.39207	4.35826079508411e-79	2.85077119017803e-77
LOC_Os01g17390	-0.979572	5.43561913207356e-79	3.54029206180962e-77
LOC_Os02g05630	-0.987695	5.43567988185524e-79	3.54029206180962e-77
LOC_Os07g09870	-1.47424	5.94295301940828e-79	3.86241151791287e-77
LOC_Os03g08580	-1.05574	8.34611572757192e-79	5.41269628933534e-77
LOC_Os07g37620	-2.73146	2.23504646670872e-78	1.44640794322154e-76
LOC_Os10g25420	1.68782480550499	3.14460434407719e-78	2.03070670338539e-76
LOC_Os01g12710	-1.42276	4.17133493008797e-78	2.6880365091855e-76
LOC_Os03g04020	-1.22482	6.05227157339532e-78	3.89187932719645e-76
LOC_Os01g34970	1.63638564782923	1.10783750140097e-77	7.10885768831475e-76
LOC_Os12g05050	1.73813160697859	1.34905250413143e-77	8.63848020329716e-76
LOC_Os01g05490	0.643887842593511	1.88229357762726e-77	1.20276977851073e-75
LOC_Os11g14150	-1.10869	2.67483536383973e-77	1.70561409699265e-75
LOC_Os09g19800	1.83335346014937	2.70299408315853e-77	1.71996376638807e-75
LOC_Os09g33830	-1.02868	2.75493834665758e-77	1.74935709294232e-75
LOC_Os07g48130	-1.09615	3.05871552257109e-77	1.93820606946921e-75
LOC_Os06g02144	0.648162155474415	3.68788971967078e-77	2.33203438073818e-75
LOC_Os03g02874	-1.92249	5.70896634928701e-77	3.60257096431356e-75
LOC_Os01g29804	-1.96018	8.19157102474184e-77	5.15848497491817e-75
LOC_Os03g19250	-0.78455	8.4345628363622e-77	5.30053023204117e-75
LOC_Os10g31460	-0.996046	9.3666944416242e-77	5.87417274508127e-75
LOC_Os01g44050	2.24237819906038	9.55364400188046e-77	5.97908715969539e-75
LOC_Os01g50080	2.50977950042182	1.19660151497145e-76	7.47347673087714e-75
LOC_Os11g47460	-1.27021	1.2048417963251e-76	7.50952214693117e-75
LOC_Os08g08190	-0.908127	1.37546191204303e-76	8.55542934901857e-75
LOC_Os03g60090	0.668349157894331	1.78198948934082e-76	1.10614270015899e-74
LOC_Os08g04620	-0.789713	1.83187526346986e-76	1.13479262757025e-74
LOC_Os06g07350	-1.06213	1.97887325349324e-76	1.22336196907013e-74
LOC_Os04g09900	1.73043345561267	5.38113249823799e-76	3.31992953481555e-74
LOC_Os07g47290	-0.704691	6.03115228036517e-76	3.71343173602403e-74
LOC_Os06g11990	1.06325194447258	6.98217110268495e-76	4.29029729816698e-74
LOC_Os11g37630	-1.92224	9.71780397868335e-76	5.95920818176679e-74
LOC_Os04g39320	-0.981523	1.42700725322531e-75	8.73316954006057e-74
LOC_Os08g02700	1.9368410084581	1.74319818746203e-75	1.06468104557922e-73
LOC_Os07g33300	-1.14509	2.87808671526709e-75	1.75430632327783e-73
LOC_Os08g42740	-1.02353	2.95715371063676e-75	1.79889574525455e-73
LOC_Os10g20610	2.09941128419876	3.2406320926603e-75	1.96740650160391e-73
LOC_Os05g35290	1.10485339104709	9.43632997770831e-75	5.71743849804733e-73
LOC_Os09g32330	-1.05644	1.1103656605042e-74	6.71429064212642e-73
LOC_Os05g04510	0.621196896159628	1.62067257847e-74	9.78063038625862e-73
LOC_Os04g58110	0.787077475776615	1.66824705844632e-74	1.00478024811294e-72
LOC_Os05g41480	0.968822086308354	1.97619309237572e-74	1.18790294659486e-72
LOC_Os03g31490	-0.879079	2.19405398472789e-74	1.31625928993064e-72
LOC_Os04g59330	2.01005826098315	3.77487822896739e-74	2.26017118528095e-72
LOC_Os06g45710	1.14443961639288	4.07337388742391e-74	2.43410098545944e-72
LOC_Os02g54130	-1.04712	4.37855598395459e-74	2.61133644721496e-72
LOC_Os12g40900	1.85203463367791	4.7772454529264e-74	2.84353615843854e-72
LOC_Os07g28614	-2.47378	7.56486496298234e-74	4.4940025920717e-72
LOC_Os04g25650	-1.18523	8.22924761659279e-74	4.87915780714009e-72
LOC_Os02g36030	2.2899514168987	1.04295262947765e-73	6.17168233038758e-72
LOC_Os03g61710	-0.965206	1.05041709583054e-73	6.20378376442366e-72
LOC_Os01g22670	2.21553910103759	1.11413378151159e-73	6.5673436237319e-72
LOC_Os02g36070	1.82843801301253	1.52423603730148e-73	8.96734300010866e-72
LOC_Os02g21880	-0.893984	1.53844832546509e-73	9.03348344929461e-72
LOC_Os01g52530	1.18122444584842	1.82379173985374e-73	1.06883332484376e-71
LOC_Os04g34170	0.963185542921689	2.03906632312388e-73	1.19269694777185e-71
LOC_Os12g06670	-0.999776	2.24671872998104e-73	1.31163525702694e-71
LOC_Os06g45090	-1.37941	2.29893153805924e-73	1.3395460088431e-71
LOC_Os04g47220	1.58212629869922	2.65648268439714e-73	1.5449249967232e-71
LOC_Os08g43190	-1.08221	2.85292845253341e-73	1.6560051872568e-71
LOC_Os05g43850	-0.930161	5.9838582680969e-73	3.46676253490353e-71
LOC_Os02g36210	1.63221898901673	7.10853702526591e-73	4.11051829202448e-71
LOC_Os07g04810	-1.97144	7.66236072848729e-73	4.42235984663509e-71
LOC_Os03g14450	0.918775162716623	1.36034718402064e-72	7.83642423279769e-71
LOC_Os02g04840	-1.30722	1.39986872658209e-72	8.04884823964475e-71
LOC_Os01g60730	-1.71435	1.42705734157077e-72	8.18969360400312e-71
LOC_Os05g49880	1.14831913467648	1.44877356919188e-72	8.29866231271946e-71
LOC_Os08g41300	0.82607049370201	1.60240200570609e-72	9.16140214390161e-71
LOC_Os04g59150	0.667336216971869	7.50699475602754e-72	4.28391655721076e-70
LOC_Os10g07556	1.59165180366047	8.09464783712982e-72	4.61061439352323e-70
LOC_Os06g32990	1.46537963379937	9.59354951435253e-72	5.45415704726255e-70
LOC_Os02g02890	0.708134582382355	1.39848096649894e-71	7.9358576636253e-70
LOC_Os02g38050	-0.612281	1.44321987618658e-71	8.1744833806501e-70
LOC_Os02g28810	0.973102552648284	1.76377332624919e-71	9.97154823256419e-70
LOC_Os03g51030	-0.932962	3.50544664254966e-71	1.97813849869741e-69
LOC_Os09g16330	-0.85513	3.80711180902312e-71	2.14439097746754e-69
LOC_Os03g45390	-2.08154	4.17414488541496e-71	2.34677986755603e-69
LOC_Os07g30820	-1.11311	5.67073746085195e-71	3.18230905183161e-69
LOC_Os04g11040	0.951724689908886	1.01486258802174e-70	5.68472568642162e-69
LOC_Os07g33780	0.755762060877496	1.10031866783175e-70	6.1520758457299e-69
LOC_Os05g28740	-0.767108	1.48421939192891e-70	8.28330587613021e-69
LOC_Os07g49400	0.712265043702143	1.54550049354237e-70	8.60951337208509e-69
LOC_Os06g11210	0.975835099327776	1.9405446914103e-70	1.0790421816076e-68
LOC_Os08g32850	-0.878109	2.64190085161641e-70	1.46635139238622e-68
LOC_Os04g01354	1.5415	2.74772467406736e-70	1.52230953891499e-68
LOC_Os03g51640	-1.07871	3.31075606433126e-70	1.83090829913999e-68
LOC_Os02g07410	1.16293486670532	7.36867332897542e-70	4.06761466377707e-68
LOC_Os07g42370	0.691383659116119	9.85928839384569e-70	5.43261079324657e-68
LOC_Os06g40650	-0.737876	1.14261274728851e-69	6.28457673083674e-68
LOC_Os02g52250	-0.880237	1.19053838158623e-69	6.53635657298315e-68
LOC_Os01g08970	-0.871239	1.48082946480391e-69	8.11547909936497e-68
LOC_Os07g08760	-1.05062	2.33989103389206e-69	1.28003823177807e-67
LOC_Os04g49660	1.3714728459503	2.35303622203677e-69	1.28491830753089e-67
LOC_Os06g47350	-0.85514	3.46526675456084e-69	1.88888088900936e-67
LOC_Os07g40300	-2.32941	4.3561055117258e-69	2.37022012960021e-67
LOC_Os04g52630	1.76583601531943	5.92585757813664e-69	3.21858721601079e-67
LOC_Os01g70210	0.965618031043995	9.40126475141537e-69	5.09712778394028e-67
LOC_Os09g31482	-0.96426	9.93696798300836e-69	5.3779860884552e-67
LOC_Os10g41250	-2.17482	1.37539962421037e-68	7.43057814742144e-67
LOC_Os09g28510	-0.839593	1.84214310177478e-68	9.93450790489039e-67
LOC_Os01g38620	-0.716843	2.33501245794066e-68	1.25702192780041e-66
LOC_Os11g06720	0.86844547185906	3.66907980876252e-68	1.97170903645443e-66
LOC_Os03g61780	-1.25871	3.73194292499387e-68	2.00195372145703e-66
LOC_Os07g41360	1.45207598675224	4.34740366147616e-68	2.32800404520174e-66
LOC_Os12g42550	-0.722979	4.45744888341575e-68	2.38273752615068e-66
LOC_Os04g37770	1.73044927882875	4.56522688157797e-68	2.43606913736975e-66
LOC_Os01g21120	3.13620029535277	6.06723628078996e-68	3.23189244687403e-66
LOC_Os09g39070	2.2433137762632	6.63151982065969e-68	3.52629907106967e-66
LOC_Os07g10150	0.846795752945656	6.93142871714292e-68	3.6793426851766e-66
LOC_Os05g02010	-1.20126	7.17233434956618e-68	3.8005874839095e-66
LOC_Os03g49940	1.59868844664154	7.55921472061068e-68	3.99862739029729e-66
LOC_Os01g60230	1.10131432216056	8.84995979335509e-68	4.67327043532445e-66
LOC_Os04g30240	-1.13099	9.7539295155878e-68	5.14169012384954e-66
LOC_Os07g46860	1.9306740599659	1.08758338993106e-67	5.72317238549187e-66
LOC_Os04g51400	-1.292	1.16130510261102e-67	6.10056234905296e-66
LOC_Os03g49600	1.34605392035549	1.16826522938541e-67	6.12654400292872e-66
LOC_Os05g04410	-1.08641	1.20856130258524e-67	6.32695362812956e-66
LOC_Os02g32469	-0.674831	1.21566523117444e-67	6.3532085346051e-66
LOC_Os04g47700	-1.29466	1.2518937246736e-67	6.53132067404325e-66
LOC_Os03g59740	-0.802647	1.62089922352302e-67	8.44199842169115e-66
LOC_Os05g25450	0.980491109713714	1.77116174602191e-67	9.20883002854741e-66
LOC_Os07g42450	1.22337285793786	2.06005992787013e-67	1.06926250454092e-65
LOC_Os01g42380	1.13463435858442	2.23857511948036e-67	1.15994038899684e-65
LOC_Os03g45920	1.52784687907612	2.25089733262718e-67	1.16434172226511e-65
LOC_Os08g37490	-0.871802	2.70101449397068e-67	1.39480571899172e-65
LOC_Os06g07820	-1.28372	2.89639226430051e-67	1.49316384933838e-65
LOC_Os03g04050	-1.13235	3.39132744474701e-67	1.74535728526946e-65
LOC_Os02g07870	1.54285934228133	3.61550748189801e-67	1.85758911434814e-65
LOC_Os03g01700	-0.659879	4.99034466356701e-67	2.55963445678e-65
LOC_Os08g23180	1.82234604266301	6.71591903855193e-67	3.43891234809084e-65
LOC_Os12g02060	-1.85428	7.58504647604138e-67	3.87742476664327e-65
LOC_Os07g38730	0.83488546046233	9.81289908177266e-67	5.00787145085902e-65
LOC_Os04g57440	-0.811313	1.05030309192345e-66	5.34273423086572e-65
LOC_Os02g16620	-0.85845	1.05041921030303e-66	5.34273423086572e-65
LOC_Os02g08100	0.682584109763829	2.10161057497596e-66	1.06715504588429e-64
LOC_Os05g06140	2.24804604517689	2.514938087168e-66	1.27490594765503e-64
LOC_Os11g40510	-0.67464	3.16268755138185e-66	1.60060406926506e-64
LOC_Os09g36730	-0.98296	1.02804621686041e-65	5.1941949720974e-64
LOC_Os05g10670	-1.27775	1.23673397411556e-65	6.23822563129335e-64
LOC_Os01g07760	-0.658665	1.72678935591618e-65	8.69569951151432e-64
LOC_Os03g11590	1.07477699976953	1.80103979026573e-65	9.0546159108632e-64
LOC_Os04g09920	1.55646408825242	2.66669527107716e-65	1.33845220074394e-63
LOC_Os03g03410	-0.837419	2.74272368709926e-65	1.37434404722918e-63
LOC_Os03g11010	-1.24538	3.29499080365667e-65	1.6483625046714e-63
LOC_Os02g14110	1.15420480988298	3.63555858002989e-65	1.81574958571739e-63
LOC_Os05g30920	-1.29863	4.00793602715426e-65	1.99844888855613e-63
LOC_Os03g64150	-1.91391	9.37863948648628e-65	4.66875120492581e-63
LOC_Os01g57770	-0.875682	1.28324776148673e-64	6.37765750218634e-63
LOC_Os11g06750	0.765128500983349	1.5072030540513e-64	7.47848092855211e-63
LOC_Os06g17390	1.84564046677034	2.33990641249715e-64	1.15913018636015e-62
LOC_Os06g20960	2.53849584305612	2.47446083541741e-64	1.22379188243993e-62
LOC_Os01g70200	1.29332405415686	2.59201086279398e-64	1.27984744160295e-62
LOC_Os05g04620	-0.946753	3.27888925997837e-64	1.6163808060211e-62
LOC_Os03g49260	-1.66503	4.28112073926187e-64	2.10703185121989e-62
LOC_Os09g32080	1.79524013546881	4.79408648849557e-64	2.35568553528403e-62
LOC_Os07g47820	-0.759961	6.09658967737822e-64	2.99086889721187e-62
LOC_Os05g43530	1.90239976350672	6.32394352923455e-64	3.09740847641221e-62
LOC_Os03g58470	-0.76175	1.01445293682847e-63	4.96070748015671e-62
LOC_Os02g44980	-0.973544	1.16731101954463e-63	5.69902599847021e-62
LOC_Os03g03510	-1.01022	1.40823044727075e-63	6.85993335658913e-62
LOC_Os12g36670	1.13608454556244	1.40960624272363e-63	6.85993335658913e-62
LOC_Os12g08900	2.04720598850293	2.08769672757433e-63	1.01436715121247e-61
LOC_Os04g35060	1.13425319529631	2.37069852698246e-63	1.15003455178147e-61
LOC_Os12g38290	0.902560944510689	3.32068433124894e-63	1.60831106081636e-61
LOC_Os11g03300	-1.32213	3.46460998210091e-63	1.67535098911894e-61
LOC_Os02g13360	-1.94591	3.52073692041121e-63	1.69978943128932e-61
LOC_Os04g41100	-0.911776	3.8780736940331e-63	1.86934214703186e-61
LOC_Os07g46910	1.75095857641646	4.37321133043931e-63	2.10467714915573e-61
LOC_Os07g37650	-0.668313	5.90312937545188e-63	2.83648630464051e-61
LOC_Os02g45660	0.984656788151156	6.35485394587668e-63	3.04872614539093e-61
LOC_Os12g05110	0.887084957674852	7.18169823402931e-63	3.43997690529505e-61
LOC_Os06g29950	-2.62658	8.66986030112172e-63	4.14626526602073e-61
LOC_Os04g44820	-0.97175	1.06369060088425e-62	5.0789973809255e-61
LOC_Os03g06200	1.32208109279378	1.17458000862867e-62	5.59969052389491e-61
LOC_Os12g09540	2.57812664111842	1.22237533715291e-62	5.81843008682987e-61
LOC_Os01g08830	-0.948646	1.48648596969663e-62	7.06452457098324e-61
LOC_Os04g41970	1.79517267041025	2.89477182779665e-62	1.37359407042532e-60
LOC_Os04g58710	1.78554706600533	3.3238350100515e-62	1.57473155242564e-60
LOC_Os02g06910	-1.22528	3.58298332760803e-62	1.69486813207661e-60
LOC_Os03g49350	-1.09258	4.53208478221263e-62	2.14049519776055e-60
LOC_Os08g22320	-2.30103	4.74814366504595e-62	2.23906260024864e-60
LOC_Os03g14000	-0.983956	4.92350517129941e-62	2.31816305402853e-60
LOC_Os12g37519	-1.24811	5.07853250265908e-62	2.38745973108004e-60
LOC_Os08g15420	2.28742292260295	5.83728082259053e-62	2.73991872685052e-60
LOC_Os10g36000	-1.80498	7.11732632082161e-62	3.33560242487073e-60
LOC_Os05g48340	-1.1126	7.51825453681553e-62	3.51808046141202e-60
LOC_Os04g48800	-1.3496	8.69316124822015e-62	4.06161586061235e-60
LOC_Os06g06080	-1.13661	1.66559720880984e-61	7.77006207103681e-60
LOC_Os11g07830	1.79476187975139	1.79826606798751e-61	8.37611955955713e-60
LOC_Os08g13930	-1.17012	2.54278206265227e-61	1.18258806143167e-59
LOC_Os03g58330	-1.14614	3.59978160363123e-61	1.67161766803126e-59
LOC_Os06g51060	-1.06716	4.10668041825095e-61	1.90409743295001e-59
LOC_Os04g43070	1.41545743352622	4.46692966597848e-61	2.06797766697719e-59
LOC_Os03g25330	2.00380009500001	4.66661183672883e-61	2.15713777547027e-59
LOC_Os04g33990	1.22791068943413	5.15531980701227e-61	2.37942651365835e-59
LOC_Os01g50030	2.70467864269825	5.27010868248063e-61	2.42872160130804e-59
LOC_Os09g15330	-0.821849	1.3253333767596e-60	6.0985385760242e-59
LOC_Os01g71010	-0.876792	1.40271373380269e-60	6.44485512497623e-59
LOC_Os03g17680	-2.4276	1.84207174562244e-60	8.45074724205913e-59
LOC_Os01g22680	2.94455120382878	2.06705189667837e-60	9.46859194117009e-59
LOC_Os05g18660	-1.38229	2.34852845815175e-60	1.07417806891945e-58
LOC_Os06g15910	-1.54583	3.2474336408238e-60	1.48309221650596e-58
LOC_Os01g65880	1.36041320544268	4.15661767260034e-60	1.89546751319059e-58
LOC_Os11g29400	1.08350453063704	4.87416382179443e-60	2.21934980245059e-58
LOC_Os03g07880	-0.833879	5.12824998431902e-60	2.33155233965691e-58
LOC_Os04g52180	-0.744616	5.68339720069377e-60	2.58009267546719e-58
LOC_Os01g09020	-1.05577	1.02024375476857e-59	4.62469955961859e-58
LOC_Os04g40700	-1.20036	1.33341686218889e-59	6.03529870243115e-58
LOC_Os12g39970	-0.682041	1.34790193244876e-59	6.09179571728996e-58
LOC_Os02g41670	1.26862659661051	1.37213815734332e-59	6.19212970233746e-58
LOC_Os07g43170	1.44372355539846	1.94561896637833e-59	8.76710318242417e-58
LOC_Os10g39640	-2.20609	2.4618430757485e-59	1.10768371289891e-57
LOC_Os06g43210	-0.722206	2.84706275880334e-59	1.27911759042485e-57
LOC_Os04g38320	-2.07365	3.27014684112027e-59	1.4670322466005e-57
LOC_Os12g38051	0.857569927042876	5.73233722409583e-59	2.56781692206331e-57
LOC_Os07g02300	-0.839483	6.42949703470677e-59	2.87587620305355e-57
LOC_Os01g09450	-1.46152	6.78876779121978e-59	3.0321169036379e-57
LOC_Os03g13380	0.699036093230112	6.90068533742122e-59	3.07758424080651e-57
LOC_Os01g68770	-0.69715	7.0869414352278e-59	3.1560235826338e-57
LOC_Os07g40850	-1.35533	7.61569915314314e-59	3.38653662926903e-57
LOC_Os04g39629	-1.07931	1.00117957667597e-58	4.44552963564616e-57
LOC_Os12g16010	1.28389817090445	1.66587266494976e-58	7.38617827654694e-57
LOC_Os05g39540	1.17880085989971	1.75005638278185e-58	7.74813900126534e-57
LOC_Os10g37340	-2.47479	2.09328501831387e-58	9.25426702282479e-57
LOC_Os11g14300	-0.890802	2.51044226356864e-58	1.10823819867495e-56
LOC_Os01g47262	-1.35502	4.29160240106402e-58	1.89178809609802e-56
LOC_Os04g54240	4.11605481732808	4.83748582577437e-58	2.12933384770989e-56
LOC_Os07g39280	0.94073167574507	5.87654235874178e-58	2.58296116161113e-56
LOC_Os10g41040	-0.917621	7.16811991458114e-58	3.14611162080664e-56
LOC_Os04g51630	0.723004635789623	9.30822004932953e-58	4.07952191672056e-56
LOC_Os02g54890	-1.16541	1.26003075832714e-57	5.5144022367307e-56
LOC_Os03g10340	0.72485860580058	1.28757123440367e-57	5.62683429103765e-56
LOC_Os03g55990	-1.2801	1.4989154472573e-57	6.54103475520487e-56
LOC_Os08g25720	0.643090753688549	1.98360305208476e-57	8.64373501894129e-56
LOC_Os01g22370	0.825479754715651	2.173727896449e-57	9.45867062924072e-56
LOC_Os05g46580	1.06617552444746	2.5991058883745e-57	1.12934863858284e-55
LOC_Os06g41840	-1.06828	2.97795770765905e-57	1.29211928154291e-55
LOC_Os07g41280	-0.944683	3.30156833600689e-57	1.43049148871774e-55
LOC_Os06g43600	2.09009979804922	3.8448183559508e-57	1.66349921926884e-55
LOC_Os01g46070	0.826913520595436	4.01755489298821e-57	1.73576632990241e-55
LOC_Os01g62610	-2.10464	4.28454407791e-57	1.84849209466256e-55
LOC_Os02g54080	-1.2583	4.6848046280596e-57	2.01831469641729e-55
LOC_Os04g55670	1.57826071425381	4.88332688714462e-57	2.10086662799704e-55
LOC_Os07g38130	1.60353980496515	6.60044161165258e-57	2.83557954887041e-55
LOC_Os01g72140	-0.715527	7.04814166917082e-57	3.02364283511283e-55
LOC_Os08g05570	1.01359515943914	7.13941328327995e-57	3.05848442851046e-55
LOC_Os01g62970	-3.46437	7.55159854442092e-57	3.23051225495228e-55
LOC_Os02g13870	-1.26394	9.79773309606202e-57	4.18550350912672e-55
LOC_Os05g46460	-0.8218	1.18759252073794e-56	5.06617308706384e-55
LOC_Os04g20220	0.80911197822301	1.60229359549048e-56	6.82568095244235e-55
LOC_Os07g48320	-2.28806	1.62554818917818e-56	6.91505926182425e-55
LOC_Os05g03174	1.80546163501509	1.85312585283403e-56	7.87216144410614e-55
LOC_Os08g33420	-0.8586	1.97388578588168e-56	8.37346025988524e-55
LOC_Os07g08290	-1.53999	2.21083638187907e-56	9.36557094585428e-55
LOC_Os01g59350	-1.21061	2.5695561097617e-56	1.08700443163438e-54
LOC_Os03g07410	4.65566170716624	2.79371742383343e-56	1.18019040504608e-54
LOC_Os01g52390	0.826485186638726	2.86364125361706e-56	1.20805148918192e-54
LOC_Os03g60240	-1.00058	4.04441536416253e-56	1.70380800161174e-54
LOC_Os02g02230	-0.859842	5.11585515989953e-56	2.15219710295303e-54
LOC_Os02g36880	-1.38393	5.4304323700162e-56	2.2813816431825e-54
LOC_Os07g38530	-0.92055	5.54682820192373e-56	2.3270665736512e-54
LOC_Os09g19720	-1.06554	6.3436390314463e-56	2.65768766915249e-54
LOC_Os03g57790	-0.664978	7.45394636811027e-56	3.1185589096622e-54
LOC_Os02g02210	-1.11539	1.49173594230341e-55	6.23250555234899e-54
LOC_Os01g09560	0.70233400515784	1.76927278607699e-55	7.38192058454288e-54
LOC_Os02g14770	0.635565857993132	1.88309385559127e-55	7.84605242625533e-54
LOC_Os03g51479	-1.11399	2.69596057086544e-55	1.12175563233164e-53
LOC_Os11g05110	0.783017120485824	3.62931541558057e-55	1.50804996831009e-53
LOC_Os01g58790	0.718911971455521	4.3100491969819e-55	1.78846461630834e-53
LOC_Os07g08330	0.661025377308469	4.41077713801516e-55	1.82776835735517e-53
LOC_Os01g54300	1.99846282236625	6.12747778404887e-55	2.53569203101538e-53
LOC_Os01g11650	0.83549863903916	6.93369376741971e-55	2.8654243156228e-53
LOC_Os11g02240	-0.802191	1.10706198243247e-54	4.56884630361818e-53
LOC_Os09g07350	1.92331272594947	1.11871675438605e-54	4.61068953948594e-53
LOC_Os03g19270	3.41769960935304	1.16736652251456e-54	4.80468472920199e-53
LOC_Os01g42520	1.63666459090832	1.18358706818655e-54	4.86486273864353e-53
LOC_Os03g49380	1.23636557155893	1.21153575888087e-54	4.97301911499601e-53
LOC_Os06g36700	0.804030933240897	1.34507798322311e-54	5.51373206707739e-53
LOC_Os07g06850	-1.71713	1.38275084606784e-54	5.66053159273207e-53
LOC_Os06g02510	0.829716581338459	1.8897601421831e-54	7.72566458126899e-53
LOC_Os03g17980	-0.647333	1.92503379931378e-54	7.85112872145435e-53
LOC_Os03g02550	-1.84762	1.92561218641667e-54	7.85112872145435e-53
LOC_Os04g36660	-0.701876	1.97618284183506e-54	8.04652976134609e-53
LOC_Os12g39180	-0.984778	2.34694833007643e-54	9.54341984058885e-53
LOC_Os08g23780	-1.13936	2.57048084679944e-54	1.04384172812085e-52
LOC_Os02g42990	-1.48401	2.83920256940004e-54	1.15142913801162e-52
LOC_Os04g35910	-0.851919	3.11081558940768e-54	1.25990102486583e-52
LOC_Os02g02050	-1.06849	3.14585727788274e-54	1.27239886920321e-52
LOC_Os11g07280	0.799875694192997	3.17672825853324e-54	1.2831788407908e-52
LOC_Os03g03450	1.39425810230459	3.59425853679885e-54	1.44990673282857e-52
LOC_Os01g61814	0.863435656365863	4.06568913322997e-54	1.63790729372613e-52
LOC_Os12g19030	-0.822213	4.1891289678767e-54	1.68540405670552e-52
LOC_Os12g12360	-0.507542	4.34226302200028e-54	1.74470636825839e-52
LOC_Os08g01320	-1.24208	5.12878727439113e-54	2.058010471476e-52
LOC_Os05g37690	-0.713726	5.52728051454997e-54	2.21499030475035e-52
LOC_Os03g61920	-1.07144	6.6157997604421e-54	2.64771270412641e-52
LOC_Os11g14050	-0.795025	7.5554601954528e-54	3.0198012786451e-52
LOC_Os04g50990	0.840023477992593	9.98009737813411e-54	3.98365671723526e-52
LOC_Os02g37590	1.20191344100725	1.44503124173005e-53	5.76042860399228e-52
LOC_Os12g05840	2.19178629278151	1.50476760478182e-53	5.99070830720469e-52
LOC_Os05g07650	0.748935937020889	1.51329400402516e-53	6.01677783352016e-52
LOC_Os08g13469	4.40460325833736	1.57868033029608e-53	6.26855625669526e-52
LOC_Os04g47310	-0.827752	2.46137614582309e-53	9.76078446562646e-52
LOC_Os06g34840	-1.57441	2.48478722477681e-53	9.8407927381265e-52
LOC_Os01g46380	-0.50692	3.0375083277437e-53	1.20141551751174e-51
LOC_Os10g21590	-2.10941	3.0873039849968e-53	1.21952516893068e-51
LOC_Os01g46610	0.48631508005365	3.36546669394352e-53	1.32767879329424e-51
LOC_Os05g47650	-1.83587	3.38621164069441e-53	1.33413229615753e-51
LOC_Os10g25090	1.30929592735211	3.87155974548778e-53	1.52338112831509e-51
LOC_Os01g31690	-2.22672	4.8682361690428e-53	1.91307844079594e-51
LOC_Os07g26660	3.70636877786105	4.91886569733147e-53	1.93048024580689e-51
LOC_Os04g31610	-1.91376	7.27536920880426e-53	2.85164471462617e-51
LOC_Os07g48980	3.31100387819148	7.41490884810535e-53	2.90259803763156e-51
LOC_Os12g03040	-1.37839	7.80380096407885e-53	3.05090501443987e-51
LOC_Os02g19890	-1.44965	7.88249239873865e-53	3.07771359178479e-51
LOC_Os01g60280	-0.662045	8.15583954070444e-53	3.18035917269316e-51
LOC_Os02g09930	1.62261424040064	8.49467906473508e-53	3.30824786725969e-51
LOC_Os02g48690	1.39345118626177	1.04027052763335e-52	4.04614685019131e-51
LOC_Os05g51420	-0.639681	1.08032546606467e-52	4.19657463292758e-51
LOC_Os04g59160	1.7635893841167	1.20319811732295e-52	4.66388762681892e-51
LOC_Os03g59190	2.84002814275729	1.20369272325515e-52	4.66388762681892e-51
LOC_Os02g49760	-0.909416	1.35902067299414e-52	5.25902961702161e-51
LOC_Os03g57460	1.61257141215405	1.42779943025459e-52	5.51816359220124e-51
LOC_Os01g15640	-0.75779	1.54761830168289e-52	5.97364952588666e-51
LOC_Os08g34280	1.35453903154028	1.67251574313402e-52	6.44755878874075e-51
LOC_Os09g21340	-0.884546	2.02731814201788e-52	7.80543146931845e-51
LOC_Os07g03200	-1.36087	2.09802007446969e-52	8.06743092099495e-51
LOC_Os05g38550	-0.658804	2.71813212242805e-52	1.04387255853247e-50
LOC_Os11g32260	-0.66299	2.85101924733625e-52	1.09352586919268e-50
LOC_Os07g41340	4.32904524390607	3.34655701462897e-52	1.28197579542764e-50
LOC_Os05g09500	-1.1369	3.66773653603812e-52	1.40324370415265e-50
LOC_Os10g40730	1.15806044970873	5.03179085344555e-52	1.92270038440201e-50
LOC_Os08g08840	0.661600922056664	6.15718733454127e-52	2.3497742781356e-50
LOC_Os02g43930	-0.615964	7.68955865483117e-52	2.93089744417725e-50
LOC_Os02g58560	-0.597274	8.03616500977445e-52	3.05917390409636e-50
LOC_Os04g46820	2.55896562022792	8.3458221994909e-52	3.17308160024644e-50
LOC_Os04g52670	-3.92809	9.36269587066349e-52	3.55525290389639e-50
LOC_Os10g38090	-0.818285	1.12495136336518e-51	4.2663990857999e-50
LOC_Os06g11860	-0.878801	1.53220518539284e-51	5.80368031368724e-50
LOC_Os06g51220	-0.636525	1.64778850441958e-51	6.23372327741615e-50
LOC_Os01g49290	0.834569373272397	1.77958404362569e-51	6.72395382247442e-50
LOC_Os05g47980	0.589059644112303	2.48983168319128e-51	9.39587102679229e-50
LOC_Os04g57600	-0.80906	2.75077489295074e-51	1.03677285184622e-49
LOC_Os08g23810	1.47582430350989	3.09437233020153e-51	1.16483203954715e-49
LOC_Os06g36390	-2.15751	3.11543087780293e-51	1.17130958688818e-49
LOC_Os11g42960	1.16725382801308	3.38861743886367e-51	1.2724467656849e-49
LOC_Os09g28500	-5.42667	3.98816976364352e-51	1.49573577720076e-49
LOC_Os06g03640	1.83341053562939	3.99350259066716e-51	1.49589131524301e-49
LOC_Os01g62420	0.982163810520096	4.086570050044e-51	1.52886979879629e-49
LOC_Os10g31620	2.84087038830875	4.5674515163103e-51	1.70667819803555e-49
LOC_Os04g52640	-0.979225	5.08558917436298e-51	1.8979543598457e-49
LOC_Os07g09310	-0.91412	6.65456152481249e-51	2.48045518797422e-49
LOC_Os01g42850	-0.932905	7.18227595211816e-51	2.67388133855111e-49
LOC_Os01g12720	-0.832302	7.80895429874916e-51	2.90363268888453e-49
LOC_Os10g40614	2.10662516792246	8.16382960834406e-51	3.03188084697671e-49
LOC_Os07g35790	-1.41991	8.62592501112515e-51	3.19958701388271e-49
LOC_Os10g41240	-0.960345	9.09467691431191e-51	3.36935070676871e-49
LOC_Os04g55740	-0.824529	9.48544940965514e-51	3.50984707109575e-49
LOC_Os04g53930	-1.29781	1.00917519317372e-50	3.72965646118733e-49
LOC_Os02g04730	-1.5365	1.32191862403851e-50	4.87954816368389e-49
LOC_Os01g22490	0.612022364063307	1.38037635972219e-50	5.08915483118911e-49
LOC_Os02g37834	-2.35158	1.41724475419132e-50	5.21875501737085e-49
LOC_Os11g31560	-2.29231	1.64715476981248e-50	6.05802412075166e-49
LOC_Os06g28590	-1.1353	1.7062725837167e-50	6.2678728147738e-49
LOC_Os06g48250	-1.16065	1.86910249865078e-50	6.85773481290254e-49
LOC_Os06g45940	-2.25799	2.69638780610812e-50	9.88112427838369e-49
LOC_Os08g09350	0.954347546399654	2.73538431262591e-50	1.00119674191131e-48
LOC_Os01g22010	0.602937601702537	3.06340253226627e-50	1.11990927189196e-48
LOC_Os09g22505	-1.2047	3.45377043270488e-50	1.26110301898141e-48
LOC_Os05g04584	1.14643301415753	3.94289076387882e-50	1.43797320712396e-48
LOC_Os12g36840	0.883550716919377	4.65399398395051e-50	1.69528001216573e-48
LOC_Os04g49194	-1.05168	5.53656142506024e-50	2.01435469263914e-48
LOC_Os10g38040	-0.806292	5.95742857420265e-50	2.16488826180344e-48
LOC_Os01g12650	1.3388774382459	6.67544929821674e-50	2.42291725363437e-48
LOC_Os06g46372	-1.33048	7.13768182836635e-50	2.58760107856485e-48
LOC_Os02g17320	-0.875841	9.91306125897081e-50	3.58947227681972e-48
LOC_Os08g08830	-0.898521	1.05729923708188e-49	3.82387795423096e-48
LOC_Os10g38740	1.39579266079777	1.08740620769531e-49	3.92809349326136e-48
LOC_Os01g03630	4.38944239882574	1.31031497589938e-49	4.72770347650719e-48
LOC_Os09g39500	1.07787641505756	1.35645545626185e-49	4.88838260161855e-48
LOC_Os02g13100	-0.888592	1.56744456973678e-49	5.64205846545726e-48
LOC_Os04g52500	-0.79897	1.73870357142885e-49	6.25111203647517e-48
LOC_Os09g25690	5.09395344895966	1.8755246733503e-49	6.73506003124237e-48
LOC_Os01g15270	-1.36604	1.96417074886246e-49	7.0450728180897e-48
LOC_Os08g03640	0.601624440198633	2.10494580268026e-49	7.54111089921353e-48
LOC_Os02g10070	0.710882367186992	2.18507008447259e-49	7.81895196344922e-48
LOC_Os01g54930	-1.11669	2.35678892514116e-49	8.42351256722603e-48
LOC_Os07g06680	1.53479317505628	2.78591758680544e-49	9.94559499064253e-48
LOC_Os02g46420	-1.09144	2.80419899827379e-49	9.99912271178142e-48
LOC_Os12g20390	-0.678539	4.46864437008623e-49	1.59154902998294e-47
LOC_Os12g07010	0.675335919575825	4.595504418938e-49	1.63481710416863e-47
LOC_Os06g06350	-0.766752	6.43165588946232e-49	2.28534165343325e-47
LOC_Os02g36619	-2.01136	7.08913158610908e-49	2.51602131065454e-47
LOC_Os10g35150	-0.853253	8.11208180615199e-49	2.87572354564008e-47
LOC_Os12g32240	-0.521822	8.60864114388395e-49	3.04820057080762e-47
LOC_Os06g35060	-1.48434	1.07575356872416e-48	3.80466517980394e-47
LOC_Os01g53680	1.39108858855392	1.15495624469595e-48	4.08004055036841e-47
LOC_Os03g13540	0.731724546146114	1.25701668684982e-48	4.43543150199818e-47
LOC_Os02g57390	-0.648697	1.31705204779719e-48	4.64188355571257e-47
LOC_Os09g26170	-1.35798	1.32230821336543e-48	4.65501465482905e-47
LOC_Os01g28989	-1.08732	1.40526598510748e-48	4.9413375957259e-47
LOC_Os08g09240	-0.739878	1.51047117215304e-48	5.3051375487537e-47
LOC_Os02g08130	-0.863208	1.60226935638578e-48	5.6210639842941e-47
LOC_Os05g24880	-0.733214	1.65535497008492e-48	5.80060792282292e-47
LOC_Os07g42640	-0.821139	1.96323094836061e-48	6.87153423766815e-47
LOC_Os06g04070	0.897853195527049	2.13437273670221e-48	7.46196335167062e-47
LOC_Os05g09380	-1.13187	2.33704716568615e-48	8.16115115861195e-47
LOC_Os06g34120	1.88251681219191	2.50426725046274e-48	8.73506796904526e-47
LOC_Os03g31026	-0.960581	2.57603173593752e-48	8.97509522110831e-47
LOC_Os05g07860	-0.86909	2.58281020138875e-48	8.98841591366595e-47
LOC_Os10g30790	0.709782909662716	3.05647550739626e-48	1.0624658175196e-46
LOC_Os09g23350	-0.69643	3.35606103520821e-48	1.16527342975905e-46
LOC_Os02g51670	-0.506146	3.55924897253924e-48	1.23441410203824e-46
LOC_Os10g25010	-0.901719	4.27144539652465e-48	1.47972987677328e-46
LOC_Os09g30490	2.57409967087459	4.6013465035339e-48	1.59220199375981e-46
LOC_Os03g57349	-0.912063	4.69422293847995e-48	1.62249414655461e-46
LOC_Os03g27280	-1.12807	6.19882756742801e-48	2.14010827798967e-46
LOC_Os02g41904	2.53870262858973	6.66005511113794e-48	2.29673737256657e-46
LOC_Os06g12690	-0.556108	7.32681485069456e-48	2.52380974517243e-46
LOC_Os03g12660	-0.971581	7.86090362194118e-48	2.70471996114211e-46
LOC_Os04g55510	-0.676643	8.01879921933426e-48	2.75592991022905e-46
LOC_Os05g23320	-0.998541	9.27191665367278e-48	3.18300922052045e-46
LOC_Os01g16350	-0.981148	9.94256993496304e-48	3.4093935416216e-46
LOC_Os04g55410	-0.608272	1.45115289445733e-47	4.97052549975386e-46
LOC_Os03g16110	-0.734823	1.46317015997654e-47	5.00604989717059e-46
LOC_Os09g36350	1.21382321276451	1.89281567070666e-47	6.46875072361952e-46
LOC_Os09g07360	-0.768769	1.9793723500342e-47	6.75696850714255e-46
LOC_Os05g48660	-0.633755	2.23599475347644e-47	7.62444130288557e-46
LOC_Os05g18730	-1.9019	3.41838398802071e-47	1.16431766382573e-45
LOC_Os06g20820	1.89547693003806	3.57290426244486e-47	1.21558675667251e-45
LOC_Os06g15700	-0.758549	3.75518182222049e-47	1.27617441681183e-45
LOC_Os10g31780	-0.922854	3.86609620757183e-47	1.31240158760608e-45
LOC_Os11g17380	2.62335348224794	4.1581533972251e-47	1.40997094459307e-45
LOC_Os07g07930	0.95412727567615	4.24059626589178e-47	1.43632490003746e-45
LOC_Os06g46970	2.3126628786595	5.5362775921879e-47	1.87309698825347e-45
LOC_Os03g09830	2.61739740050637	5.98201550879719e-47	2.0216553746175e-45
LOC_Os08g30020	-0.79813	6.80608220385707e-47	2.2976004030246e-45
LOC_Os07g05400	0.700800023965746	1.01319565616405e-46	3.41655865608489e-45
LOC_Os08g36910	-2.58659	1.06250011577768e-46	3.57884867347661e-45
LOC_Os03g50520	1.23451393290034	1.11318640439203e-46	3.74542894645886e-45
LOC_Os03g22890	-0.636326	1.28869373901136e-46	4.33115013986402e-45
LOC_Os03g11550	-1.32336	1.31084856553912e-46	4.40074723724478e-45
LOC_Os12g38300	0.620617048874683	1.74012262463842e-46	5.83545421731006e-45
LOC_Os01g61070	2.04580643312654	2.08108796629232e-46	6.97118629765939e-45
LOC_Os06g04280	0.631285932799338	2.45791151443552e-46	8.22440446898467e-45
LOC_Os03g37290	1.21196309729373	2.48793799850738e-46	8.31572771017589e-45
LOC_Os05g02220	-0.972717	2.5854339203546e-46	8.63211395406206e-45
LOC_Os09g31486	1.00323727505022	2.61913216683515e-46	8.73503552483092e-45
LOC_Os01g60860	-1.16117	3.05317777596548e-46	1.01714627857356e-44
LOC_Os07g35510	-0.870757	3.08529079245414e-46	1.02671996436855e-44
LOC_Os01g58890	-0.550295	3.79139728665009e-46	1.26031846853278e-44
LOC_Os04g54810	1.4551978217223	3.85923178431977e-46	1.28146718288068e-44
LOC_Os07g04560	1.02171305073716	4.80838323278714e-46	1.59489405025576e-44
LOC_Os01g08560	0.759866078703061	5.68417242449581e-46	1.88333102901377e-44
LOC_Os05g07090	-0.670584	5.91132892133859e-46	1.95646333483607e-44
LOC_Os09g37180	1.74769	6.6699693769058e-46	2.20514987573877e-44
LOC_Os01g06600	-0.572447	6.85351146597752e-46	2.26337030129394e-44
LOC_Os10g39770	-1.81755	8.65637023949142e-46	2.85566331024263e-44
LOC_Os02g55320	-0.773211	8.91690263579018e-46	2.93842373315487e-44
LOC_Os05g51470	1.06234755462844	9.95406359421598e-46	3.27665366105707e-44
LOC_Os05g44922	0.753911841310771	1.00923846187363e-45	3.31859427636199e-44
LOC_Os11g15040	-0.853006	1.06635020760055e-45	3.50260344647713e-44
LOC_Os06g50480	-0.85515	1.0978692775351e-45	3.60224292831796e-44
LOC_Os08g17870	1.88122740869488	1.20785280777681e-45	3.95884170273054e-44
LOC_Os10g41410	1.29705789551234	1.28778060401788e-45	4.21626855240129e-44
LOC_Os03g17100	1.55135162244092	1.33571567728494e-45	4.36850839142996e-44
LOC_Os03g01530	1.44875912871962	2.01005991768566e-45	6.56691540884285e-44
LOC_Os10g34710	-0.629863	2.73417598236425e-45	8.92303612441965e-44
LOC_Os01g47080	0.969775614158554	3.37147403463285e-45	1.09910776245866e-43
LOC_Os05g36930	-2.01015	3.62027514367363e-45	1.17895384122031e-43
LOC_Os03g14990	0.730492608218161	3.76759218090469e-45	1.22561586924489e-43
LOC_Os10g25780	0.88829705561061	4.0510901764939e-45	1.3164311838487e-43
LOC_Os05g04000	1.76614793714032	4.87483592194991e-45	1.58242272574203e-43
LOC_Os01g51410	1.17074361771942	5.5852606660268e-45	1.81110115584084e-43
LOC_Os08g34790	1.22242424028398	5.75494926613421e-45	1.86413777293651e-43
LOC_Os06g37290	1.65935987469064	5.78827742828776e-45	1.87293878998724e-43
LOC_Os10g22590	1.40385073135432	5.9629620453175e-45	1.92741183390411e-43
LOC_Os07g35350	-0.83629	7.23853181570202e-45	2.33723124953708e-43
LOC_Os03g38730	-1.23655	7.59187573548049e-45	2.44872208240058e-43
LOC_Os01g67360	-0.839258	7.84487809239733e-45	2.52764631417751e-43
LOC_Os10g42160	2.68086578059547	7.86587950725339e-45	2.53173112267322e-43
LOC_Os10g35220	-0.844378	9.24806875198563e-45	2.97345939915851e-43
LOC_Os06g44140	-0.857895	1.00138578753198e-44	3.2162777311059e-43
LOC_Os07g08660	0.865169126549806	1.01339240214127e-44	3.25140752146928e-43
LOC_Os05g31000	0.66226860720787	1.05876322093212e-44	3.39339748449644e-43
LOC_Os03g20340	-1.00877	1.12479008617417e-44	3.60122265906036e-43
LOC_Os09g25490	1.4445720371237	1.19817845068365e-44	3.83215517938949e-43
LOC_Os07g46790	1.19963951104168	1.2706674693521e-44	4.05972917519051e-43
LOC_Os05g46720	-0.61084	1.41251108467915e-44	4.50817808516274e-43
LOC_Os05g06430	0.676203228733708	1.43779946200711e-44	4.58407845245371e-43
LOC_Os12g01940	-1.02345	1.49561401338284e-44	4.76341317602645e-43
LOC_Os06g45640	-2.1546	2.23250105090864e-44	7.10290292515033e-43
LOC_Os01g09510	0.867561767979951	2.62135270578457e-44	8.33135463940893e-43
LOC_Os01g06310	1.35478158242877	2.67511918279388e-44	8.49336378537147e-43
LOC_Os05g05670	1.31666926118613	3.0527921236307e-44	9.68234882506271e-43
LOC_Os10g28200	0.826064049264707	3.19338418551597e-44	1.01177055611098e-42
LOC_Os06g03940	-1.01809	3.34755636825775e-44	1.05951378248624e-42
LOC_Os04g41620	3.70562548231906	4.48797671290359e-44	1.41898440436253e-42
LOC_Os02g53410	-1.29204	4.7652435685839e-44	1.50508461455917e-42
LOC_Os04g44950	-1.19875	5.10225243771833e-44	1.60985591437387e-42
LOC_Os11g47760	-0.498843	5.31268647217e-44	1.67451473303132e-42
LOC_Os06g13680	-0.629622	5.38827841630928e-44	1.69658257050169e-42
LOC_Os01g41565	-0.889606	5.626001838795e-44	1.76960157113535e-42
LOC_Os03g13560	1.20963115555421	6.97073492427784e-44	2.19030861009127e-42
LOC_Os02g09810	-0.66244	8.33278923780756e-44	2.61558428748354e-42
LOC_Os08g24310	0.911908145993715	9.4437076457525e-44	2.96123517271349e-42
LOC_Os08g39140	0.57135050640818	1.19804610088399e-43	3.75280846596163e-42
LOC_Os01g09590	-1.02476	1.39896793331451e-43	4.37767578803439e-42
LOC_Os09g32500	1.39497662850758	1.42617674385484e-43	4.45823143279432e-42
LOC_Os06g02440	-1.08804	1.50461896662871e-43	4.69861298654814e-42
LOC_Os02g32770	2.11057767247096	1.7863754266214e-43	5.57275845908888e-42
LOC_Os07g18050	-1.15714	1.86051382691557e-43	5.79809309010901e-42
LOC_Os05g36310	-1.45199	1.95746403415864e-43	6.09398424390678e-42
LOC_Os07g02200	1.81515889377986	2.17932825845327e-43	6.77775545082973e-42
LOC_Os01g54560	-0.690899	2.28955386174071e-43	7.11328603255418e-42
LOC_Os07g18230	3.94759157093637	2.49602925523078e-43	7.74685977827546e-42
LOC_Os08g01710	-0.911041	2.53458136569214e-43	7.85849406920408e-42
LOC_Os04g43650	-1.77857	3.07503109376691e-43	9.52445476049027e-42
LOC_Os08g35710	2.37883319725367	3.23464425218142e-43	1.00086408519176e-41
LOC_Os01g15830	0.920079866996527	3.49076035897943e-43	1.07901389307641e-41
LOC_Os07g41694	-0.694455	3.74710294095051e-43	1.15707495484214e-41
LOC_Os02g14840	-2.87355	4.15108551683347e-43	1.28052147139966e-41
LOC_Os02g11830	0.947593611398861	4.68103008004523e-43	1.44253506499145e-41
LOC_Os03g60920	-1.28129	4.72290173836566e-43	1.45396537726852e-41
LOC_Os11g31070	-1.46591	5.08798191552792e-43	1.56477308334375e-41
LOC_Os05g44916	-1.0589	5.17700363588562e-43	1.59054285443532e-41
LOC_Os10g14180	-1.32627	5.8256138041858e-43	1.78801079180742e-41
LOC_Os07g27810	1.67240790971561	6.29751678580129e-43	1.93089990480778e-41
LOC_Os09g32620	-2.36622	6.35438325153137e-43	1.94637382657178e-41
LOC_Os01g36240	1.14742373157335	6.52964108676071e-43	1.9980438963271e-41
LOC_Os10g15310	-0.769316	7.6980237043611e-43	2.35319687428992e-41
LOC_Os05g40270	-0.694382	8.37603146423581e-43	2.55788527124695e-41
LOC_Os03g55320	-0.825502	8.55471310764903e-43	2.60983103191828e-41
LOC_Os08g43270	1.59807816155217	9.78838482452022e-43	2.98320153128865e-41
LOC_Os04g54830	0.77096607722826	1.32881400166305e-42	4.04576643389223e-41
LOC_Os07g12250	0.993915737442518	1.36527605094006e-42	4.15262363653929e-41
LOC_Os02g02290	-0.629818	1.4468592432811e-42	4.39637070366012e-41
LOC_Os03g17570	-0.56546	1.56308527830269e-42	4.74479060128291e-41
LOC_Os07g34589	-0.510784	1.56559124826475e-42	4.74765936263417e-41
LOC_Os06g46500	1.77521512720377	1.58020756516515e-42	4.78721048825331e-41
LOC_Os05g02820	1.22083393297081	1.69470312287216e-42	5.12896419754025e-41
LOC_Os05g19110	-1.60809	1.7693007077838e-42	5.34940858130737e-41
LOC_Os12g18650	-0.655573	2.08941365006941e-42	6.3109836723447e-41
LOC_Os02g13510	-0.640423	2.12140701319702e-42	6.40126147950404e-41
LOC_Os12g06850	-0.83509	2.45288375681297e-42	7.39414393926891e-41
LOC_Os11g15520	-2.06939	2.51495176086265e-42	7.57373987706913e-41
LOC_Os03g29190	-0.605799	2.6651683737265e-42	8.01817618746442e-41
LOC_Os03g01830	-1.52895	2.76111384066804e-42	8.29862041282203e-41
LOC_Os09g32320	1.73988715574139	3.52108640690202e-42	1.05722965599538e-40
LOC_Os09g29660	0.788846384123923	3.91647905002442e-42	1.17478921879233e-40
LOC_Os04g47930	-1.63079	4.00977641525393e-42	1.20158974824004e-40
LOC_Os07g44190	1.13585157450526	4.56852913911197e-42	1.36768092810265e-40
LOC_Os09g21180	1.61208	4.70230567510299e-42	1.40634542196591e-40
LOC_Os01g57854	0.597542944556221	5.21479857695063e-42	1.55808755910148e-40
LOC_Os03g60620	0.984088808852184	5.23755462943434e-42	1.56335094807532e-40
LOC_Os07g10720	0.65435169072328	5.52703545877039e-42	1.64814029915647e-40
LOC_Os02g37930	1.08525986416649	5.86516773747014e-42	1.74725702157582e-40
LOC_Os01g73160	1.59838323007057	6.74405858676552e-42	2.00711630112583e-40
LOC_Os03g52360	-1.12391	7.04631640230012e-42	2.09502208887938e-40
LOC_Os07g31280	-0.632168	1.02070629184995e-41	3.03181665751057e-40
LOC_Os05g13900	-1.33462	1.12223883093349e-41	3.33014792991932e-40
LOC_Os02g27030	-0.466667	1.14057587880176e-41	3.38126276117293e-40
LOC_Os05g15690	2.25070493442307	1.14909927160217e-41	3.4032135779018e-40
LOC_Os01g67240	1.70805144722134	1.32727754985306e-41	3.92708890625785e-40
LOC_Os09g19290	-2.18759	1.32859720993772e-41	3.92717324951075e-40
LOC_Os01g72910	-1.78358	1.5250443628531e-41	4.50347080976115e-40
LOC_Os06g04990	4.13165170859023	1.80680095147979e-41	5.33032567800284e-40
LOC_Os04g44870	1.62119518966347	1.87468778572142e-41	5.52524260566888e-40
LOC_Os12g34850	-0.916477	2.06368547042038e-41	6.07638502113323e-40
LOC_Os02g21660	0.915188273874184	2.25100046292163e-41	6.62151161317451e-40
LOC_Os11g10510	0.554212034500339	2.51164009498834e-41	7.38106716223819e-40
LOC_Os04g46620	0.8389504068295	3.25885338874273e-41	9.56769157065626e-40
LOC_Os01g07870	-0.655479	3.40425201268851e-41	9.98493049353266e-40
LOC_Os11g24560	0.803430630198551	3.52856168844284e-41	1.03395695872522e-39
LOC_Os10g31950	0.63178654169965	4.3476565029199e-41	1.27274610387692e-39
LOC_Os03g55230	-3.00421	4.65818056553228e-41	1.36233865462721e-39
LOC_Os07g42950	0.625944640384684	4.98803189704665e-41	1.45740613045697e-39
LOC_Os07g09630	2.0952745468291	5.42358446466522e-41	1.58314534623088e-39
LOC_Os09g37230	-0.703337	5.4681833568703e-41	1.59463341306392e-39
LOC_Os03g58110	1.5284441490667	5.52955512354489e-41	1.61098609806266e-39
LOC_Os01g55110	-1.46055	5.94881324001345e-41	1.73147467472009e-39
LOC_Os03g38000	0.575707476108294	6.42626495050156e-41	1.86865463417261e-39
LOC_Os11g25780	-4.07991	6.8176661992489e-41	1.98057435641217e-39
LOC_Os09g32976	0.554059716171485	6.90911092756144e-41	2.00522440813653e-39
LOC_Os01g38359	1.11668514058302	7.41816207206868e-41	2.15091341834167e-39
LOC_Os01g65080	-0.656187	7.59970364780831e-41	2.20145320144512e-39
LOC_Os01g19450	0.693959331146082	1.0552344954541e-40	3.05385465401825e-39
LOC_Os03g63400	1.07521559927388	1.36091887906409e-40	3.93476317733967e-39
LOC_Os01g52130	1.69836243122344	1.40464057993356e-40	4.05731698758398e-39
LOC_Os10g40530	1.14012622316276	1.43800783226892e-40	4.14975770647927e-39
LOC_Os06g49500	-0.637527	1.61357433930028e-40	4.65198835110497e-39
LOC_Os06g27560	0.627968642139645	1.67622248451939e-40	4.82802870162327e-39
LOC_Os03g22590	2.04923753178989	1.96250018141732e-40	5.64724744730266e-39
LOC_Os02g17000	1.21610468130303	2.0787470474035e-40	5.97610304289459e-39
LOC_Os10g41200	-0.978691	2.13711955806623e-40	6.13811411502762e-39
LOC_Os07g15370	-0.620175	2.21539114605221e-40	6.3569185941815e-39
LOC_Os04g33390	1.19909411990571	2.21948072681347e-40	6.36265087528355e-39
LOC_Os05g50910	1.91318062435405	2.47524708330124e-40	7.08918223029102e-39
LOC_Os06g49250	-0.767984	2.86895886656132e-40	8.20905483399145e-39
LOC_Os04g42270	0.687719888450261	3.13942617864072e-40	8.97451002345264e-39
LOC_Os11g07960	-1.56182	3.1672239405409e-40	9.0454726174171e-39
LOC_Os06g09630	1.2714583621344	3.55378696018703e-40	1.01399609925937e-38
LOC_Os05g50510	0.988001661999397	3.60871822412458e-40	1.02870453144305e-38
LOC_Os01g57350	-1.51447	3.86730683676168e-40	1.1013858122373e-38
LOC_Os01g42960	2.09752749056414	3.88348311032035e-40	1.10495811303558e-38
LOC_Os09g08390	0.801836144177944	4.07373536362306e-40	1.15800686747625e-38
LOC_Os05g38830	-0.727326	4.16268407056299e-40	1.18218672913393e-38
LOC_Os03g15040	-0.806577	4.48532530733483e-40	1.27262737451396e-38
LOC_Os12g38270	-0.53955	4.88915252050688e-40	1.38591298288665e-38
LOC_Os09g36800	0.818524571080986	5.0037034475845e-40	1.41706372496955e-38
LOC_Os05g48290	1.44024924639148	5.07385817982094e-40	1.4355950734645e-38
LOC_Os01g50160	-0.613778	5.17771372210869e-40	1.4636184067998e-38
LOC_Os04g52040	-0.831347	5.62141230023183e-40	1.58756617013789e-38
LOC_Os08g06550	0.947340291461859	6.31917412165507e-40	1.78296846089296e-38
LOC_Os03g60130	-0.691126	7.19963243364149e-40	2.02887139453286e-38
LOC_Os03g12250	1.25885225036626	7.20404098532184e-40	2.02887139453286e-38
LOC_Os06g06050	-0.6478	8.12747535975353e-40	2.28682044904961e-38
LOC_Os05g06720	1.86978815490204	8.23447380540451e-40	2.31478516880946e-38
LOC_Os12g19381	-1.85989	8.3375745847625e-40	2.34160358790523e-38
LOC_Os06g05180	0.77684411136066	8.89825417300083e-40	2.49676475023979e-38
LOC_Os02g56250	0.918853846119412	9.00978414917343e-40	2.52572898323741e-38
LOC_Os01g48790	-0.671877	9.10616935412748e-40	2.55039822352801e-38
LOC_Os03g13210	-0.51424	9.27427796012581e-40	2.59509142994652e-38
LOC_Os07g45060	1.48543991091004	1.13096527091774e-39	3.16171320590387e-38
LOC_Os09g33930	-0.863186	1.20664904259697e-39	3.37019626075568e-38
LOC_Os04g56140	-0.889958	1.22251901749989e-39	3.41138884736482e-38
LOC_Os05g43540	-1.0433	1.32245751359379e-39	3.68688063551501e-38
LOC_Os04g42700	-0.813246	1.3818243625617e-39	3.84886170436599e-38
LOC_Os02g36400	-0.666183	1.41085377679687e-39	3.9261233737469e-38
LOC_Os01g47760	-0.974247	1.55264704872683e-39	4.3167561822738e-38
LOC_Os04g40600	-0.669301	1.57838642145119e-39	4.38431062966751e-38
LOC_Os02g43350	-0.879821	1.79185971146498e-39	4.9727376810145e-38
LOC_Os07g43990	0.984841498807559	1.92380218198115e-39	5.33403529326698e-38
LOC_Os01g13420	-0.994952	1.96862662712875e-39	5.4533467660062e-38
LOC_Os04g50940	1.11340822170949	2.01903307722839e-39	5.58788990691344e-38
LOC_Os06g37224	0.846891668564694	2.15719536401853e-39	5.9648412901807e-38
LOC_Os04g06734	-1.52243	2.55927169321078e-39	7.07019144602171e-38
LOC_Os02g46460	-0.940961	2.82716202215298e-39	7.80317241976454e-38
LOC_Os02g34690	1.14787052731756	3.75801674512994e-39	1.03629952239232e-37
LOC_Os03g12670	-0.500702	4.12761538475879e-39	1.13718794875746e-37
LOC_Os02g49800	-0.476889	4.89567451107753e-39	1.34757317582746e-37
LOC_Os03g17740	0.789312694115153	4.90822042532903e-39	1.34980499508868e-37
LOC_Os01g69900	-0.89568	5.07574339796778e-39	1.39461437391678e-37
LOC_Os03g60910	-1.25641	5.10282737301804e-39	1.4007905900516e-37
LOC_Os07g38800	1.57833957541196	5.91183792962846e-39	1.62141084280955e-37
LOC_Os09g33820	-1.15282	6.29667700114848e-39	1.72540295195434e-37
LOC_Os01g63180	-0.748529	6.86076584078281e-39	1.8782813124505e-37
LOC_Os03g16010	1.15707233103647	6.87878104642178e-39	1.88151982291335e-37
LOC_Os12g25690	1.80055703091477	6.93856271808969e-39	1.89616642977013e-37
LOC_Os06g49740	-0.638176	7.3161942324457e-39	1.99757059043149e-37
LOC_Os03g17690	0.487007823289444	8.16894279766066e-39	2.22839967832867e-37
LOC_Os01g03760	0.66207446417288	8.50319419571231e-39	2.31750138581349e-37
LOC_Os12g32980	-0.670652	9.07278634706897e-39	2.47052703251969e-37
LOC_Os05g04500	2.31050892993813	9.5397877372904e-39	2.59536837045997e-37
LOC_Os12g13380	0.826307980377008	9.84234333175722e-39	2.67528788899667e-37
LOC_Os12g02830	-0.846304	1.00178994060968e-38	2.72057525299857e-37
LOC_Os01g24010	1.15788642318023	1.0250852473604e-38	2.78135529738749e-37
LOC_Os06g11130	1.06299909555405	1.04175735699658e-38	2.82407235030374e-37
LOC_Os07g46846	1.20031506653914	1.055404969168e-38	2.85852159770383e-37
LOC_Os02g41780	2.28873395544038	1.10419824852227e-38	2.98801547393714e-37
LOC_Os06g45140	-1.34831	1.1284700393442e-38	3.05098175259494e-37
LOC_Os07g43720	-0.866043	1.23381589003171e-38	3.3328369548139e-37
LOC_Os01g41610	1.02045558327658	1.32727849237252e-38	3.58212090718746e-37
LOC_Os01g19410	-0.833236	1.35408486611722e-38	3.65122741913311e-37
LOC_Os11g02150	-0.758258	1.43672069225632e-38	3.87061971440816e-37
LOC_Os02g27110	-0.707892	1.44448622547513e-38	3.88809672867714e-37
LOC_Os01g71770	-0.882817	1.50080437290635e-38	4.036115455908e-37
LOC_Os08g27070	0.632369425905576	1.50406207327388e-38	4.04130318204049e-37
LOC_Os02g07490	0.92510598847131	1.76069478848392e-38	4.72668073137926e-37
LOC_Os06g45184	-2.54462	1.9479505081845e-38	5.22476743006523e-37
LOC_Os02g55440	0.910734898195994	2.16906852153407e-38	5.81272142299386e-37
LOC_Os11g37970	0.774770528529869	2.80426307367481e-38	7.50831563810677e-37
LOC_Os03g05530	1.1084625229301	2.93516587248888e-38	7.85189139644871e-37
LOC_Os03g61500	2.01621142792158	3.03293197505821e-38	8.10629692033132e-37
LOC_Os07g34570	1.62343688485321	3.09905349883771e-38	8.27575164360385e-37
LOC_Os07g48750	1.88161742873603	3.38876516949606e-38	9.04146328029756e-37
LOC_Os03g51520	-0.733151	3.43061045358216e-38	9.14508742823445e-37
LOC_Os02g12680	-1.11813	3.6658025144324e-38	9.76348942898214e-37
LOC_Os01g62900	1.7745759582137	4.04008821885334e-38	1.07509469172916e-36
LOC_Os03g19680	-0.928594	4.09844624810547e-38	1.08967081365713e-36
LOC_Os04g52660	-1.78499	4.13583369835357e-38	1.09865081021067e-36
LOC_Os09g30412	-0.489888	4.221283092059e-38	1.12037126115241e-36
LOC_Os08g09040	0.905027838327868	4.26051411240927e-38	1.12979770918082e-36
LOC_Os06g05020	2.9217732431681	4.62331049044132e-38	1.22493564353017e-36
LOC_Os06g14440	-0.758978	4.63702921138685e-38	1.22750113571403e-36
LOC_Os04g51390	-1.49482	4.85756808242981e-38	1.284763398219e-36
LOC_Os07g29330	-0.844091	5.13707344681596e-38	1.35750847922115e-36
LOC_Os01g72740	2.04567188695038	7.16578711681821e-38	1.89196684848214e-36
LOC_Os03g62640	-0.638079	7.55169528492986e-38	1.99212804671662e-36
LOC_Os09g32670	-0.841847	7.61380150696149e-38	2.00677111469446e-36
LOC_Os03g08470	-0.476385	7.81373540470936e-38	2.05768464129558e-36
LOC_Os03g16670	0.721812385017097	8.30046450128794e-38	2.18396996774372e-36
LOC_Os01g11620	3.7174925481497	8.93472920594365e-38	2.34882215668092e-36
LOC_Os01g35330	-2.18777	9.00363651590437e-38	2.36489299022234e-36
LOC_Os07g12650	0.796844445568201	9.11444117568276e-38	2.39193134425856e-36
LOC_Os07g06880	-2.20204	9.82066654800022e-38	2.57504649762047e-36
LOC_Os08g01270	-0.893669	1.05568152203134e-37	2.7656855447119e-36
LOC_Os12g21798	0.827894696612008	1.10807229468184e-37	2.9004412147197e-36
LOC_Os01g27020	-0.927292	1.38791398947138e-37	3.62981873635094e-36
LOC_Os03g63270	1.60523238270835	1.39464813684205e-37	3.64429705585807e-36
LOC_Os05g45210	1.41369048761768	1.52095129892589e-37	3.97092315091243e-36
LOC_Os01g12000	-1.07096	1.53410131698098e-37	4.00182038227218e-36
LOC_Os10g03850	-1.72148	1.67454441549855e-37	4.36443384248534e-36
LOC_Os02g47840	-1.0372	1.84215209211423e-37	4.79716592754679e-36
LOC_Os03g53270	-0.492522	2.04551785038078e-37	5.32219597409595e-36
LOC_Os02g37190	0.594342126853404	2.06510315778212e-37	5.36856219205991e-36
LOC_Os01g02020	-0.67199	2.09668512038736e-37	5.44600978836054e-36
LOC_Os02g06584	-0.745466	2.16485902305612e-37	5.61828942365828e-36
LOC_Os02g48560	0.62964079193563	2.32809477404213e-37	6.03677158118206e-36
LOC_Os12g18530	-2.20982	2.38189186549915e-37	6.17100706823016e-36
LOC_Os02g50620	0.618922862482179	2.65151085867028e-37	6.86368972572895e-36
LOC_Os02g18320	-0.910069	3.60086383889259e-37	9.31325463637389e-36
LOC_Os01g68950	-0.653789	4.82568807950267e-37	1.24705291950852e-35
LOC_Os03g11440	0.66212153979444	5.1725077003336e-37	1.33554324459547e-35
LOC_Os07g41650	-1.0979	5.41787038942013e-37	1.39770946365227e-35
LOC_Os03g63950	-1.69162	6.17453529428191e-37	1.5915649619566e-35
LOC_Os10g33230	-0.630424	6.90516793394221e-37	1.7783877043081e-35
LOC_Os09g24690	0.815087863355619	7.24892751229327e-37	1.86534161771499e-35
LOC_Os03g59310	0.528301664868332	7.4208700180986e-37	1.90797280194833e-35
LOC_Os09g25620	1.03817934938576	8.26044059804677e-37	2.12204021309283e-35
LOC_Os01g58114	-0.881399	8.60783978025541e-37	2.20941818359703e-35
LOC_Os01g31450	-2.57314	8.61901227644237e-37	2.21042055143568e-35
LOC_Os10g17280	0.638556414167249	8.97541002503342e-37	2.29988265645675e-35
LOC_Os03g31134	0.797245105680025	9.1820115872601e-37	2.35084229325003e-35
LOC_Os02g12080	2.3480550187431	9.35448016149054e-37	2.3929845970723e-35
LOC_Os09g27660	-1.15315	1.08340470868393e-36	2.76914601843113e-35
LOC_Os06g29890	-4.96365	1.1713123377431e-36	2.99132124809356e-35
LOC_Os11g38959	0.610614347468888	1.29281025955634e-36	3.29883530659947e-35
LOC_Os03g17084	-0.631015	1.32218929057511e-36	3.37097313177977e-35
LOC_Os05g03530	-0.832345	1.58295024201566e-36	4.03241327982817e-35
LOC_Os04g32330	0.722965210274658	1.63101946664653e-36	4.15138812531554e-35
LOC_Os02g28074	-1.02442	1.69407987846486e-36	4.30828876115276e-35
LOC_Os03g46770	-0.655234	1.78433833826171e-36	4.53403800305499e-35
LOC_Os03g08550	0.957877965073602	2.00090141966747e-36	5.08008493995039e-35
LOC_Os03g63330	1.19430300733046	2.12185357186345e-36	5.38267708438689e-35
LOC_Os01g13170	-0.778133	2.24016860334171e-36	5.67808068660344e-35
LOC_Os06g35165	3.84531769437369	2.36616687976456e-36	5.99245060906902e-35
LOC_Os03g55820	-0.939211	2.69750048929689e-36	6.82588809338221e-35
LOC_Os02g33140	0.960639031698431	2.94429627326215e-36	7.44419912282141e-35
LOC_Os12g43630	-0.563204	3.23446723279376e-36	8.17105941467233e-35
LOC_Os02g46610	-0.912426	3.59941984437972e-36	9.08547335988825e-35
LOC_Os01g73200	0.947769702031224	3.84331445762569e-36	9.69305576642977e-35
LOC_Os03g61910	-2.68903	3.85889907046223e-36	9.72429777358568e-35
LOC_Os02g38230	1.85318161664707	4.65407996427311e-36	1.17184185590506e-34
LOC_Os01g32364	1.39910700429627	4.94076648234454e-36	1.24299713256403e-34
LOC_Os09g30486	2.17520482427181	5.07488036177423e-36	1.27568232300599e-34
LOC_Os11g18947	-0.733859	5.17203680129321e-36	1.29903114242885e-34
LOC_Os10g41980	-1.08934	5.29801364705777e-36	1.32957411789529e-34
LOC_Os11g03820	-0.910298	5.36332280528384e-36	1.34485429880885e-34
LOC_Os10g28080	-0.884823	5.6276806481701e-36	1.4099796918842e-34
LOC_Os12g03200	1.74759600181692	6.16682862444925e-36	1.54378814354937e-34
LOC_Os04g35840	-0.952655	6.79858103352468e-36	1.70053980851716e-34
LOC_Os03g03600	1.71687971876491	6.84629713807654e-36	1.71106798481295e-34
LOC_Os06g04030	-0.510995	7.57049008307155e-36	1.89050924767409e-34
LOC_Os03g38020	-0.574218	7.72540007906263e-36	1.92761090077743e-34
LOC_Os06g21410	0.732482922338397	7.82817378669299e-36	1.95165355652503e-34
LOC_Os07g48510	-1.25775	8.00350156127196e-36	1.99373057729441e-34
LOC_Os03g24930	-1.42857	8.05142271320282e-36	2.00402678596381e-34
LOC_Os01g38530	-0.952717	8.21760775116862e-36	2.0437183757935e-34
LOC_Os01g69870	-1.58938	8.71652732673923e-36	2.16602855531128e-34
LOC_Os01g01790	-0.729401	8.7252474242915e-36	2.16642551556939e-34
LOC_Os10g33440	-1.07762	8.86262711962539e-36	2.19874116207607e-34
LOC_Os09g34960	1.55025562699483	9.13253344492924e-36	2.26385604939664e-34
LOC_Os04g56530	0.67850564958683	9.19211997892095e-36	2.27677134591905e-34
LOC_Os03g04000	0.860887195356892	9.71422822017591e-36	2.40413316147169e-34
LOC_Os03g01190	-0.726862	9.99083280232655e-36	2.47057862207776e-34
LOC_Os01g63190	-1.98924	1.03452573131732e-35	2.55614416277396e-34
LOC_Os07g06590	-0.56968	1.14965774244516e-35	2.8383108680367e-34
LOC_Os11g03730	-0.67386	1.26124121518565e-35	3.11126624501921e-34
LOC_Os08g01090	-1.07439	1.29583512715844e-35	3.19401306544985e-34
LOC_Os05g06710	0.880471590464378	1.29992392971029e-35	3.20149686202982e-34
LOC_Os05g44130	-0.871017	1.43928998045971e-35	3.54186440498888e-34
LOC_Os04g57200	-0.672527	1.47074085389617e-35	3.61633418044509e-34
LOC_Os02g32280	-0.835244	1.56772279985252e-35	3.85168470761827e-34
LOC_Os05g30530	0.924691236992152	1.64972131951212e-35	4.04987277274259e-34
LOC_Os04g52380	-0.988511	1.82785471700772e-35	4.48355073165377e-34
LOC_Os10g34400	-0.841726	1.84172151405408e-35	4.5139243812626e-34
LOC_Os03g54084	-1.16223	1.93033866275631e-35	4.72730924045056e-34
LOC_Os08g02690	-0.635903	1.94963190026747e-35	4.77071632168426e-34
LOC_Os06g42720	0.442381347291057	2.00345120213545e-35	4.89847039904757e-34
LOC_Os01g53000	-0.89211	2.01113894436753e-35	4.91331744031186e-34
LOC_Os07g10850	6.61679641399159	2.11364528417314e-35	5.15960152194305e-34
LOC_Os06g15370	-1.14121	2.11935728768612e-35	5.16939625198565e-34
LOC_Os03g18980	1.51034473272026	2.2117333017745e-35	5.39039103419658e-34
LOC_Os05g04150	-0.958431	2.33167070121e-35	5.67815020400347e-34
LOC_Os02g02920	-1.10837	2.52795925205459e-35	6.15123268883938e-34
LOC_Os06g29180	-0.73146	2.66880416534752e-35	6.48875679402161e-34
LOC_Os03g37130	-0.633269	2.70720778557396e-35	6.57687156597584e-34
LOC_Os03g22830	-0.937553	2.8362493933332e-35	6.88486524721648e-34
LOC_Os11g08210	1.14918232248634	2.84668277766746e-35	6.9046812891175e-34
LOC_Os03g12110	1.01653711436708	2.88307293857814e-35	6.98737422309105e-34
LOC_Os01g22900	-0.806091	3.03044829317159e-35	7.33870344626648e-34
LOC_Os01g16450	1.07775512564283	3.05820476449066e-35	7.40002833068798e-34
LOC_Os08g37610	-0.78808	3.1903092260953e-35	7.71354892058145e-34
LOC_Os02g40830	0.593529557179447	3.37210382641953e-35	8.14661715523244e-34
LOC_Os09g39670	-0.724141	4.33149470457369e-35	1.04560907090725e-33
LOC_Os07g02810	1.62385014447247	4.3959574090347e-35	1.06032863245995e-33
LOC_Os09g21210	0.881171929822345	4.43402625517318e-35	1.06866357034348e-33
LOC_Os01g39136	-2.42808	4.45368400994413e-35	1.07255148730373e-33
LOC_Os06g43810	-2.07155	4.48751562236013e-35	1.07984394912742e-33
LOC_Os10g28210	-1.08479	4.51289441931624e-35	1.08509246369899e-33
LOC_Os12g13550	2.45995711806487	4.85294908115305e-35	1.16593443327292e-33
LOC_Os05g41240	-0.875879	4.93570533193275e-35	1.18488092640936e-33
LOC_Os06g37080	2.18165817677065	5.66946385221344e-35	1.35995593477069e-33
LOC_Os03g49620	-0.519793	5.83145586455549e-35	1.39771128113727e-33
LOC_Os05g37330	0.537315749978336	6.32646000153784e-35	1.51516226304547e-33
LOC_Os12g40550	-0.496003	6.63062272664414e-35	1.58675862197961e-33
LOC_Os08g23150	0.800200544974678	6.7968525504831e-35	1.62525996207149e-33
LOC_Os03g59220	0.725527211808868	7.80309251789692e-35	1.86440582894228e-33
LOC_Os03g08460	-0.777276	8.747902823573e-35	2.08851030048506e-33
LOC_Os08g10250	1.10061061139342	9.03688905486476e-35	2.15581190190405e-33
LOC_Os03g04570	-1.46995	9.57067258549985e-35	2.28136032414235e-33
LOC_Os03g45250	4.25350039861761	9.76967106920392e-35	2.32697192827648e-33
LOC_Os06g12310	1.56660216647681	1.00921059931544e-34	2.40188963918453e-33
LOC_Os08g13350	1.41472585721497	1.01921071701335e-34	2.4237930546269e-33
LOC_Os02g35190	1.03148328042114	1.05050054469377e-34	2.49625191932858e-33
LOC_Os08g30770	0.807056777492634	1.16972434598797e-34	2.77738764305777e-33
LOC_Os03g01740	-1.3138	1.19356979056551e-34	2.83179553430894e-33
LOC_Os02g56960	0.640135120382995	1.21118132959088e-34	2.87133993147593e-33
LOC_Os07g38970	0.612854559516924	1.2168641264305e-34	2.88256536366902e-33
LOC_Os07g35540	-0.950898	1.27849847273266e-34	3.02621085966044e-33
LOC_Os06g28124	1.67610450570664	1.4768372364318e-34	3.492961227318e-33
LOC_Os03g06400	-2.84809	1.72092201369116e-34	4.06709898744603e-33
LOC_Os06g29900	-2.83064	1.85197438423112e-34	4.37342025394205e-33
LOC_Os01g12160	-1.70434	2.00379393079339e-34	4.7282696818473e-33
LOC_Os02g29500	-1.6163	2.10932784581618e-34	4.97343533010425e-33
LOC_Os03g58250	-1.12975	2.36474912907368e-34	5.57135627497327e-33
LOC_Os01g12100	-0.528512	2.46729341693836e-34	5.80845174687283e-33
LOC_Os04g35090	0.591756874093931	2.73753769287279e-34	6.43967103375243e-33
LOC_Os01g64970	-0.749743	2.95731042378719e-34	6.95127927742745e-33
LOC_Os02g36380	-1.48867	3.08437573858827e-34	7.24435308609273e-33
LOC_Os10g06630	2.39472172475883	3.39562803580319e-34	7.96924555069367e-33
LOC_Os01g39060	-0.620763	3.40330344175352e-34	7.98110080835583e-33
LOC_Os03g27120	-2.88358	3.44695141670331e-34	8.0772322257664e-33
LOC_Os01g56140	-0.690239	3.69413378729651e-34	8.64979009040882e-33
LOC_Os07g38630	1.01977749235402	3.80096294381832e-34	8.89308376147524e-33
LOC_Os07g02690	1.8714281456047	4.11053723507208e-34	9.6100000416566e-33
LOC_Os11g37940	0.849690696019094	4.40102799262632e-34	1.02812340571215e-32
LOC_Os07g44330	-0.989126	4.49663261848374e-34	1.04965140233155e-32
LOC_Os01g43910	-0.734836	4.67910177867572e-34	1.09140766641258e-32
LOC_Os06g08280	-1.01703	5.42523541135181e-34	1.26447479135384e-32
LOC_Os01g74450	2.98074602888718	6.34357423183406e-34	1.47738249491167e-32
LOC_Os06g45480	0.891958903154823	6.63668844969103e-34	1.54446454388525e-32
LOC_Os05g35170	0.404846005986365	7.06404729674837e-34	1.64266102888302e-32
LOC_Os03g29240	-0.493394	7.69065597494562e-34	1.7870052875015e-32
LOC_Os11g47330	1.04991460921604	7.8554821009414e-34	1.82391101971171e-32
LOC_Os07g43670	1.04297632203824	8.37506197446013e-34	1.94306548447887e-32
LOC_Os07g33610	-2.21645	8.86653063025004e-34	2.05552130830553e-32
LOC_Os08g38880	-0.757261	9.23235528639737e-34	2.13870006390756e-32
LOC_Os02g50270	-0.802932	9.24233298268297e-34	2.1393820395836e-32
LOC_Os02g50200	-1.32842	1.05498787528315e-33	2.44019096689066e-32
LOC_Os02g47180	1.33211050194434	1.07439960625106e-33	2.48320200788238e-32
LOC_Os08g03360	-0.835935	1.08466675839592e-33	2.50502840724148e-32
LOC_Os07g08340	0.795346939574125	1.10316622207753e-33	2.54581971249697e-32
LOC_Os07g44550	1.55223640616464	1.14513485433178e-33	2.64066881951141e-32
LOC_Os11g09280	0.452235991001323	1.1758375411437e-33	2.7094147463202e-32
LOC_Os06g41450	-1.37851	1.25160750129859e-33	2.88182390306571e-32
LOC_Os01g04260	1.38860518655703	1.26690142889176e-33	2.91483160825807e-32
LOC_Os11g34110	3.54670965574401	1.34998385210797e-33	3.10363634510326e-32
LOC_Os10g42100	0.847012347415378	1.47606636208624e-33	3.39093915930628e-32
LOC_Os02g02910	-1.50608	1.56331906575832e-33	3.58867265691358e-32
LOC_Os05g46490	-0.655738	1.75366007768532e-33	4.02257352359552e-32
LOC_Os01g59690	-1.12362	1.76955548961801e-33	4.055975868291e-32
LOC_Os08g04450	-1.17876	1.93348515482314e-33	4.42837985460095e-32
LOC_Os03g52860	1.59111589127436	2.02520595596294e-33	4.63496345798109e-32
LOC_Os06g08480	-0.498319	2.15491308907411e-33	4.9281080088179e-32
LOC_Os12g41390	-0.626517	2.711427346553e-33	6.19615132778031e-32
LOC_Os03g27840	-0.600546	2.84380672555052e-33	6.49378568801385e-32
LOC_Os02g48790	-0.641109	3.07717010230204e-33	7.02139578631799e-32
LOC_Os01g16030	1.48849718739383	3.37964011730648e-33	7.70578214452728e-32
LOC_Os06g44280	1.75722419520912	3.39457448009851e-33	7.73099064705676e-32
LOC_Os07g44070	1.12695807498278	3.39577968979084e-33	7.73099064705676e-32
LOC_Os01g42030	0.8719015134282	3.55329763709915e-33	8.08177354849123e-32
LOC_Os05g40820	0.783457636559952	3.55668004605062e-33	8.08177354849123e-32
LOC_Os04g53990	-1.19859	3.557829688792e-33	8.08177354849123e-32
LOC_Os06g43800	-1.66639	3.63205883509616e-33	8.24423145733468e-32
LOC_Os12g38210	-0.606906	3.86399798820386e-33	8.76415830046299e-32
LOC_Os02g55420	0.744439736122205	3.88236371515684e-33	8.79925296275785e-32
LOC_Os09g07294	-0.495945	3.911339871917e-33	8.85832565481961e-32
LOC_Os03g52340	1.03688774315957	3.9208284598719e-33	8.87320821692439e-32
LOC_Os07g30774	-0.654348	4.6702971340164e-33	1.05614689686426e-31
LOC_Os11g43900	-0.446358	5.12744309049892e-33	1.15866500030175e-31
LOC_Os08g34390	3.23495495912755	5.40148199112809e-33	1.2196843076626e-31
LOC_Os01g39890	0.953600419125661	6.74922408511962e-33	1.52288130395399e-31
LOC_Os01g25610	0.673335383499836	7.37666022597342e-33	1.66322088534624e-31
LOC_Os01g21320	-0.52951	8.32351058751144e-33	1.87531776318332e-31
LOC_Os01g47540	-0.877253	8.61480513434594e-33	1.93951082876585e-31
LOC_Os04g54300	3.84510120534932	9.1633292745888e-33	2.06147798236607e-31
LOC_Os04g42020	-2.20186	1.06532183445863e-32	2.39488757700618e-31
LOC_Os02g42590	-0.959523	1.12943208719196e-32	2.53713488656062e-31
LOC_Os04g32620	-0.766446	1.13433161851698e-32	2.54626055415589e-31
LOC_Os04g43490	1.42167176657558	1.23349012805566e-32	2.76680204534963e-31
LOC_Os04g45810	-1.65716	1.29660878148397e-32	2.90623822384793e-31
LOC_Os04g35620	-1.29148	1.30281328809311e-32	2.91799476956112e-31
LOC_Os01g65650	0.903311498533486	1.35799253340635e-32	3.03934517263337e-31
LOC_Os05g25640	0.56090061971871	1.38069294992845e-32	3.0878791738988e-31
LOC_Os03g53340	-2.62231	1.41117754559048e-32	3.1537381503806e-31
LOC_Os01g56330	1.57576292186595	1.49826223309604e-32	3.34589897810935e-31
LOC_Os01g69270	-0.940042	1.54654293490789e-32	3.45118487954207e-31
LOC_Os05g18090	1.89368737480232	1.57027842526034e-32	3.50158274066851e-31
LOC_Os11g04420	-0.71883	1.57824877441545e-32	3.5167776353568e-31
LOC_Os04g53350	1.61419461296868	1.59082539248226e-32	3.5422068182826e-31
LOC_Os05g05210	-0.732682	1.64113121764194e-32	3.65154697262598e-31
LOC_Os07g44410	-0.49599	1.64393980384345e-32	3.65512230070925e-31
LOC_Os02g46640	-1.0407	1.75883536469005e-32	3.90772362691106e-31
LOC_Os05g43895	-2.09573	1.76650820420252e-32	3.92190609773897e-31
LOC_Os01g02900	1.77111998156071	1.85826465200383e-32	4.12260960287006e-31
LOC_Os03g05980	0.691326070066443	1.89863252897359e-32	4.2090967202085e-31
LOC_Os02g48110	0.61067295924263	1.93864177159294e-32	4.29466337398186e-31
LOC_Os06g24990	-2.48481	1.94102025087138e-32	4.29680290760582e-31
LOC_Os10g36060	1.32860956263883	2.00638320104621e-32	4.43826555949248e-31
LOC_Os09g36750	-1.16737	2.07700686784571e-32	4.591151227645e-31
LOC_Os04g44110	-0.72234	2.10037231271284e-32	4.63942805108741e-31
LOC_Os02g57710	-0.671915	2.23355279177519e-32	4.93002479786895e-31
LOC_Os09g17600	1.02463394293628	2.25271084451014e-32	4.96870580468603e-31
LOC_Os04g53830	-2.4938	2.36052718343798e-32	5.20273875445286e-31
LOC_Os04g37970	-1.72528	2.40318796924962e-32	5.2929301428455e-31
LOC_Os11g16530	-0.837067	2.55381986399741e-32	5.62062119995262e-31
LOC_Os10g32920	-0.606768	2.59577785828947e-32	5.70883437004573e-31
LOC_Os03g22880	0.80020142730449	2.64860580263021e-32	5.82080882173414e-31
LOC_Os02g15810	1.71495347029805	2.92799378588688e-32	6.43017032429858e-31
LOC_Os04g55520	-0.990184	2.96180038165592e-32	6.49972008718951e-31
LOC_Os10g39200	-0.716004	3.00347524656918e-32	6.58510545087431e-31
LOC_Os06g19470	-0.761625	3.00503891564096e-32	6.58510545087431e-31
LOC_Os02g58090	-0.562244	3.18694687920034e-32	6.97870239580689e-31
LOC_Os06g46240	-0.89559	3.67848258626375e-32	8.04926088804303e-31
LOC_Os06g39260	1.12037617296859	3.71611800309224e-32	8.12576888440357e-31
LOC_Os06g40060	-0.649547	3.77348678911202e-32	8.24528550126661e-31
LOC_Os03g58430	0.583469679094582	3.83780122554624e-32	8.37979627252078e-31
LOC_Os03g38520	0.733626958390657	3.91038466650962e-32	8.53215638569272e-31
LOC_Os02g19150	-0.611021	4.18259279346518e-32	9.11955142695605e-31
LOC_Os03g63710	0.684128291096158	4.26001426217561e-32	9.2817044268147e-31
LOC_Os11g05562	0.838368336332918	4.65386889720081e-32	1.01325752596464e-30
LOC_Os01g66940	1.31699339380747	4.66433372126401e-32	1.01480954553624e-30
LOC_Os06g51330	-1.0814	4.7199033837811e-32	1.02558504849068e-30
LOC_Os01g03060	-0.809239	4.7206045104121e-32	1.02558504849068e-30
LOC_Os08g33370	0.619499611899697	4.84626032683303e-32	1.05213314847219e-30
LOC_Os06g05060	-0.942528	5.04542253981573e-32	1.09459038495746e-30
LOC_Os01g54010	-0.723508	5.38162974169396e-32	1.16669743566189e-30
LOC_Os12g18360	-0.998371	5.42246949626018e-32	1.17471390454594e-30
LOC_Os05g03820	-0.692667	5.44209322918563e-32	1.1781260331595e-30
LOC_Os05g33310	1.19799580282903	5.69329118245635e-32	1.23162976248643e-30
LOC_Os07g07470	-0.776396	5.70390334016608e-32	1.23304850031622e-30
LOC_Os10g41550	-1.67069	6.36387457930392e-32	1.37474154264281e-30
LOC_Os04g48484	-1.28274	6.95409375870814e-32	1.50117612324249e-30
LOC_Os03g18590	1.20085561461728	7.38246213588178e-32	1.59251750585092e-30
LOC_Os09g38110	-1.99198	7.53177190548001e-32	1.62357458736414e-30
LOC_Os01g58380	-0.756533	7.59952549065527e-32	1.63701959861027e-30
LOC_Os07g26210	-0.672629	7.6262744628815e-32	1.64161899549189e-30
LOC_Os03g07600	2.06247949372114	7.71437476225619e-32	1.65940893047231e-30
LOC_Os01g04630	0.810903202080314	7.85492823874184e-32	1.68739341754986e-30
LOC_Os01g49190	0.498100466779214	7.85556640995071e-32	1.68739341754986e-30
LOC_Os06g11170	-0.74321	7.91082453139996e-32	1.69806378932294e-30
LOC_Os10g05160	1.27254490390804	8.45915429343526e-32	1.81448263038877e-30
LOC_Os08g34580	-1.18088	8.59452444481891e-32	1.84222026436654e-30
LOC_Os03g48080	0.646582487152655	8.7355359712185e-32	1.87112719789142e-30
LOC_Os02g33080	-0.479797	8.99324836220151e-32	1.9249728514055e-30
LOC_Os11g25700	-3.03569	9.04336735703558e-32	1.93433939192401e-30
LOC_Os05g02530	0.6834072713438	9.3817813554248e-32	2.00531455872523e-30
LOC_Os10g07400	2.37633756819731	9.48851810851347e-32	2.02670482295327e-30
LOC_Os06g22820	-0.863125	9.60743968209427e-32	2.05066586224968e-30
LOC_Os01g22520	0.593006870602636	1.04905512178349e-31	2.23759190632304e-30
LOC_Os05g04380	0.912238441522246	1.06659623360702e-31	2.27341212623624e-30
LOC_Os03g58170	-1.34813	1.10278901816862e-31	2.34890971825047e-30
LOC_Os08g17600	-0.603711	1.14603112018805e-31	2.43930598681873e-30
LOC_Os08g10330	-0.897464	1.15919083444665e-31	2.46559079863842e-30
LOC_Os03g18820	1.14540093155378	1.23563093453098e-31	2.62487466174059e-30
LOC_Os11g05370	0.811119526027336	1.23580369398097e-31	2.62487466174059e-30
LOC_Os05g36320	-1.19176	1.25118829345624e-31	2.65569735755512e-30
LOC_Os06g19444	-0.878239	1.2982484346792e-31	2.75366278864733e-30
LOC_Os04g55850	0.745189803662498	1.45273255119837e-31	3.07918559423342e-30
LOC_Os08g44520	-0.708326	1.48099390414911e-31	3.13690185157377e-30
LOC_Os07g46950	-3.98023	1.49821442142698e-31	3.17116839541566e-30
LOC_Os03g56420	-0.830481	1.60908719371895e-31	3.40347677914852e-30
LOC_Os01g46169	-1.02649	1.63989155492564e-31	3.46622248329523e-30
LOC_Os01g40590	-0.679602	1.65059912015198e-31	3.48643214156546e-30
LOC_Os05g45400	-0.826294	1.69115460097648e-31	3.56961542979185e-30
LOC_Os02g37862	0.570026499402927	1.70112322286327e-31	3.58816670919621e-30
LOC_Os03g02530	1.50677329768732	1.70581431439598e-31	3.59556813490425e-30
LOC_Os08g41880	1.2183693455266	1.71389825238952e-31	3.61010590337116e-30
LOC_Os03g55670	-0.821055	1.84694028704675e-31	3.88764953431238e-30
LOC_Os08g24420	-0.695043	1.99252188534081e-31	4.19118573060346e-30
LOC_Os12g32620	1.42479750559863	2.11130856936047e-31	4.43797936735785e-30
LOC_Os12g36830	0.568847796194265	2.20348615678774e-31	4.62853832492099e-30
LOC_Os07g36820	-0.800682	2.36606194172998e-31	4.96660731674667e-30
LOC_Os09g29710	0.697612165164621	2.48481761494456e-31	5.21229052249336e-30
LOC_Os09g25070	-1.47407	2.75916248123678e-31	5.78378263468628e-30
LOC_Os04g10060	1.81297562406355	2.8225615476867e-31	5.91260551201368e-30
LOC_Os01g37350	-2.78476	2.85804859922388e-31	5.98282217439735e-30
LOC_Os11g24050	-0.828875	2.93079054826247e-31	6.13087519366929e-30
LOC_Os05g02990	-0.738007	3.48369826126849e-31	7.28248565737061e-30
LOC_Os06g04620	1.3191171846846	3.50905244668407e-31	7.33044912213892e-30
LOC_Os05g06310	0.501445386185211	4.21316429520105e-31	8.79530577919252e-30
LOC_Os06g07230	-0.824884	4.4739524711314e-31	9.33331538833557e-30
LOC_Os01g37360	-3.21272	4.58446625312626e-31	9.55730812577713e-30
LOC_Os10g35670	-0.831347	4.6036282284427e-31	9.59068193125432e-30
LOC_Os05g17810	1.39595378400458	4.61052427873056e-31	9.59847409047699e-30
LOC_Os06g46799	2.02147454216833	5.50442222246662e-31	1.14516078193259e-29
LOC_Os01g38229	0.666241163103636	5.83077949315392e-31	1.21222822326569e-29
LOC_Os09g27050	-0.852788	5.90174301486665e-31	1.22614354877175e-29
LOC_Os04g51270	0.597324139491268	5.99373061325903e-31	1.24440484868865e-29
LOC_Os02g14130	0.554360915777113	6.06525976620005e-31	1.25839659651256e-29
LOC_Os03g63410	0.723144767695172	6.07737055378896e-31	1.26004978025934e-29
LOC_Os04g53810	-2.0261	6.18721749880712e-31	1.281951004385e-29
LOC_Os12g42850	-0.555559	6.359470658979e-31	1.3167437683016e-29
LOC_Os02g27950	-0.64761	7.56811335764557e-31	1.56593017609624e-29
LOC_Os03g22340	0.782477340894564	7.80641359348198e-31	1.61413919686844e-29
LOC_Os09g29460	1.38519203084888	7.94910856309066e-31	1.64252775852558e-29
LOC_Os03g18454	-0.678219	8.10895474439868e-31	1.6744193313349e-29
LOC_Os04g52270	0.80254318921374	9.08601939225538e-31	1.87490071801112e-29
LOC_Os11g40070	-1.02148	1.07945332911535e-30	2.22594253955067e-29
LOC_Os07g49520	0.528383671866924	1.10988141579166e-30	2.28713774679668e-29
LOC_Os05g06460	0.940702105847515	1.15287521378136e-30	2.3741267774119e-29
LOC_Os04g43390	-1.58629	1.24179703028531e-30	2.55551410508511e-29
LOC_Os03g11520	-0.583618	1.2468972047923e-30	2.5642748736283e-29
LOC_Os02g51910	-1.94205	1.27948953972216e-30	2.6295239081209e-29
LOC_Os04g47870	-0.632097	1.36110353129379e-30	2.79536293098123e-29
LOC_Os03g36760	-1.06821	1.46044900982418e-30	2.99736957373902e-29
LOC_Os02g44010	-1.09925	1.61556650886519e-30	3.31349095978717e-29
LOC_Os11g04030	-1.55247	1.76190468822259e-30	3.61119225047024e-29
LOC_Os04g47360	1.3317130340678	1.79031466313775e-30	3.66695022181802e-29
LOC_Os01g65460	1.45724136383884	1.91449470471571e-30	3.91865887877746e-29
LOC_Os02g40880	0.654892651620002	2.02938527905993e-30	4.15102775036227e-29
LOC_Os09g30400	-0.727014	2.13623640993372e-30	4.36665098417636e-29
LOC_Os01g60770	2.20033576079756	2.15411757779968e-30	4.40024447591371e-29
LOC_Os06g16290	1.15278850077062	2.21651798790185e-30	4.52467188724985e-29
LOC_Os08g01150	1.05661382874284	2.28850493574956e-30	4.6684886737598e-29
LOC_Os04g42620	1.60313346545339	2.29252008817287e-30	4.67354497331542e-29
LOC_Os07g10660	0.897248772742984	2.31316844360081e-30	4.71248033359426e-29
LOC_Os03g40010	-0.485401	2.40893602474571e-30	4.90429706349836e-29
LOC_Os10g32810	-1.72277	2.45898031396737e-30	5.00283245683153e-29
LOC_Os02g01332	0.886665193606815	2.76238768794744e-30	5.61636256127067e-29
LOC_Os05g44210	1.21678081279618	2.78490324169491e-30	5.6583578489908e-29
LOC_Os11g41870	-1.28506	2.81369907603866e-30	5.71304880485927e-29
LOC_Os06g09330	-0.620616	2.81825732699405e-30	5.71848664828893e-29
LOC_Os07g22720	0.686285182955714	2.8420275364931e-30	5.76287396999828e-29
LOC_Os11g02350	2.5618547923375	2.94498243559877e-30	5.96766061033792e-29
LOC_Os02g03840	-0.492122	3.01240347301798e-30	6.10021731260419e-29
LOC_Os02g34970	-1.35616	3.02111189965389e-30	6.11378173917981e-29
LOC_Os06g12390	0.53324226438708	3.06191849673856e-30	6.19224155563829e-29
LOC_Os02g01280	0.584416854659767	3.16309552881419e-30	6.39260555511047e-29
LOC_Os05g49030	0.55534491488005	3.334874065696e-30	6.73529412896478e-29
LOC_Os10g40510	1.85445431942564	3.34570096040812e-30	6.75267686873081e-29
LOC_Os03g53200	-0.582417	3.36535311828607e-30	6.78783689958813e-29
LOC_Os05g33880	-0.493797	3.37480771482493e-30	6.80239572260538e-29
LOC_Os07g32570	1.19092902262317	3.46203309463094e-30	6.97358931167514e-29
LOC_Os07g35390	-0.588254	3.64026152731675e-30	7.32774286001762e-29
LOC_Os03g22180	0.622837146145392	3.67948608253665e-30	7.40180216180124e-29
LOC_Os02g09850	-1.30177	3.87770062141254e-30	7.79538282226595e-29
LOC_Os05g02390	1.50949618285368	3.99437638488687e-30	8.02463356160627e-29
LOC_Os08g16810	1.79994534812464	4.54875792740191e-30	9.13234462837336e-29
LOC_Os06g15420	0.823454454625547	5.4042018034183e-30	1.08426254652224e-28
LOC_Os06g05110	-1.05768	5.63416250161038e-30	1.12965515259711e-28
LOC_Os06g45820	-0.742167	5.87466115452435e-30	1.17709943133078e-28
LOC_Os03g49150	-0.854762	6.02750076687262e-30	1.20692865915206e-28
LOC_Os03g55850	-0.876734	6.18275351010553e-30	1.23720151818006e-28
LOC_Os06g01490	1.54820664744678	6.32546441143994e-30	1.2649265321391e-28
LOC_Os02g12070	1.9050553249399	6.36113087821055e-30	1.27122310638405e-28
LOC_Os02g27360	-0.768576	6.40201182899726e-30	1.27855280230322e-28
LOC_Os03g38260	0.570510387348634	6.80836533240138e-30	1.35881391043517e-28
LOC_Os07g01750	0.770402178043997	7.21569246510383e-30	1.43916394766294e-28
LOC_Os03g06410	-0.601284	7.53584695107749e-30	1.50203355743101e-28
LOC_Os12g05860	2.23902	9.28986441578525e-30	1.85042905088752e-28
LOC_Os03g64320	1.11108849068259	1.08775781441984e-29	2.16526450807552e-28
LOC_Os05g50990	1.6409219780717	1.10333472912742e-29	2.19483512891692e-28
LOC_Os08g25460	-0.609863	1.12449109643677e-29	2.23545890125626e-28
LOC_Os02g32060	-1.40259	1.14291033645858e-29	2.27059182192842e-28
LOC_Os04g38860	0.95914990258779	1.31696652848946e-29	2.61467714951276e-28
LOC_Os03g63770	-0.455364	1.32555550851824e-29	2.6300128080294e-28
LOC_Os01g10150	-0.558046	1.32738783645948e-29	2.63193144939711e-28
LOC_Os11g35310	1.74584618324744	1.50589357347596e-29	2.98392566324721e-28
LOC_Os07g11290	-0.752949	1.62895136723948e-29	3.22566307200235e-28
LOC_Os03g13390	-0.995354	1.63714138413138e-29	3.23977178527912e-28
LOC_Os01g47780	1.21249748333713	1.70058712754666e-29	3.36265178920011e-28
LOC_Os04g36890	0.796899587329047	1.70144696987736e-29	3.36265178920011e-28
LOC_Os04g39700	0.806082052054024	1.7142453818994e-29	3.3857459438865e-28
LOC_Os12g39520	-1.22164	1.73801416070918e-29	3.4304632519228e-28
LOC_Os05g03430	-0.518157	1.99065069415771e-29	3.92656494899487e-28
LOC_Os03g16020	-2.19201	2.02235410579858e-29	3.98651474283665e-28
LOC_Os08g39490	1.3376061476129	2.14881834792008e-29	4.23306080766433e-28
LOC_Os06g30370	-1.72184	2.24909977121979e-29	4.4277423068881e-28
LOC_Os07g37580	-0.627501	2.34899957069977e-29	4.62142114763288e-28
LOC_Os05g02770	-0.955228	2.44304896230258e-29	4.80334694488657e-28
LOC_Os04g32980	-1.29411	2.57921096908128e-29	5.06778299971422e-28
LOC_Os02g44930	1.1118149673349	2.70051415446823e-29	5.30270100208559e-28
LOC_Os03g01260	1.48302714906721	3.37033129891416e-29	6.61367721211439e-28
LOC_Os02g18410	1.81330349088608	3.39607034551869e-29	6.65988882200493e-28
LOC_Os09g27010	1.2139776254158	3.7122289215209e-29	7.27520327815592e-28
LOC_Os06g44890	0.630922276568125	3.86250522381949e-29	7.56483959354112e-28
LOC_Os05g28280	0.741261428772409	4.08528638016799e-29	7.99601483521168e-28
LOC_Os07g46990	-0.469276	4.11456205372782e-29	8.04813629750388e-28
LOC_Os06g36880	-1.70944	4.51545527399204e-29	8.82661231450784e-28
LOC_Os06g50300	0.450991156309972	4.5729084784701e-29	8.93317818119117e-28
LOC_Os02g22780	0.663478563035888	4.64510868855966e-29	9.06839703923174e-28
LOC_Os02g46130	0.67888460916049	4.72385948187019e-29	9.21622257861216e-28
LOC_Os03g47740	-0.513879	4.89743795959274e-29	9.54874826788286e-28
LOC_Os03g59040	1.20554278842749	4.91398694823179e-29	9.57487681085317e-28
LOC_Os02g32250	-1.43522	5.19965050570888e-29	1.01250044674546e-27
LOC_Os03g04750	0.75430299133742	5.22375309938755e-29	1.01654302156732e-27
LOC_Os01g02940	1.56156955124309	5.39340880340014e-29	1.04888697035945e-27
LOC_Os03g21040	0.537550274695586	5.71530136577004e-29	1.11077703732435e-27
LOC_Os02g03700	-0.878905	5.80071054117505e-29	1.12665652503436e-27
LOC_Os08g02640	0.624500464987147	5.90213347050569e-29	1.14562406916976e-27
LOC_Os05g28510	1.02075621432481	6.67511204787637e-29	1.29483551051153e-27
LOC_Os01g42260	-0.606121	6.74374535600198e-29	1.30731522465364e-27
LOC_Os06g05740	0.788655292613616	6.90891196029268e-29	1.33848067633288e-27
LOC_Os02g56510	0.550149225131377	7.14466241215307e-29	1.38327213194174e-27
LOC_Os08g13690	0.594832018268021	7.17337466330904e-29	1.38794760661074e-27
LOC_Os08g01770	0.691651538185696	7.1911975503653e-29	1.39051153650293e-27
LOC_Os04g46810	1.69928149961914	7.81632833236695e-29	1.51042847876285e-27
LOC_Os04g55060	1.13227941745646	7.8954058146359e-29	1.52474071909819e-27
LOC_Os02g50970	-0.544849	8.23157242333723e-29	1.5886516930725e-27
LOC_Os03g02920	1.48671197009177	8.64303954758979e-29	1.66700501508872e-27
LOC_Os01g64250	-1.41779	8.78328450784058e-29	1.69298087192953e-27
LOC_Os12g06190	-2.0704	9.14508263114e-29	1.76160122424797e-27
LOC_Os09g29490	-1.18367	9.29649889773588e-29	1.78963487641478e-27
LOC_Os02g53380	-1.20695	9.7695742039388e-29	1.87951530036055e-27
LOC_Os10g25830	-1.48116	9.90948792046315e-29	1.90522746263468e-27
LOC_Os05g03460	-1.9244	1.02294750393921e-28	1.96550671382281e-27
LOC_Os04g54310	3.78264780638685	1.0309146734126e-28	1.97956443854278e-27
LOC_Os06g16350	-0.816145	1.05698556449323e-28	2.02834529524455e-27
LOC_Os09g32290	-2.31789	1.09469540982312e-28	2.09938559805674e-27
LOC_Os05g02500	-0.627659	1.14198156682386e-28	2.18869006531283e-27
LOC_Os02g57540	0.601892084553355	1.16044098534132e-28	2.22266832557566e-27
LOC_Os10g36550	-0.441336	1.35006052284965e-28	2.58423164650692e-27
LOC_Os09g19280	-2.21918	1.42476805183572e-28	2.72551855752424e-27
LOC_Os03g05110	1.77389025482081	1.51657522895236e-28	2.89931817497266e-27
LOC_Os01g25560	0.747241859651223	1.74579538538548e-28	3.33543419861086e-27
LOC_Os10g05230	-0.886531	1.75397710711505e-28	3.34896219020787e-27
LOC_Os11g10520	0.791980743347309	1.75812127278885e-28	3.35476892303298e-27
LOC_Os08g07120	3.49426312620461	1.80579297617667e-28	3.44357361525953e-27
LOC_Os02g33110	0.701159680863605	1.93142189681151e-28	3.68083511362274e-27
LOC_Os03g08820	-0.725563	2.23773490559639e-28	4.26192516522353e-27
LOC_Os03g19650	-1.04808	2.30391120585822e-28	4.38521672324054e-27
LOC_Os12g39200	-0.656596	2.51120374961662e-28	4.77678381790738e-27
LOC_Os11g29500	-1.81642	2.53005822469134e-28	4.80964068513823e-27
LOC_Os05g02780	-0.427735	2.68404287704224e-28	5.09917852268063e-27
LOC_Os07g44790	-0.633282	2.71063886443912e-28	5.14649136708991e-27
LOC_Os07g39680	0.495795908743809	3.19012154517481e-28	6.05307154822439e-27
LOC_Os01g73620	-0.632863	3.56784538608755e-28	6.76556017850617e-27
LOC_Os03g04590	0.498403913373172	3.67286210874929e-28	6.96035974453074e-27
LOC_Os01g20840	-0.85069	3.98432763165104e-28	7.54590966651918e-27
LOC_Os10g40640	-1.09217	4.1207014309119e-28	7.79933134552685e-27
LOC_Os05g43280	-0.598199	4.22732496064275e-28	7.99616393052922e-27
LOC_Os05g39310	4.17799791482821	4.41332601532056e-28	8.3428044799248e-27
LOC_Os02g07910	0.54013097378046	4.79667209721973e-28	9.06183717447423e-27
LOC_Os09g32730	-1.78973	4.87882352852131e-28	9.2113157320611e-27
LOC_Os07g31884	1.13457379570137	4.93505965064954e-28	9.31171056663501e-27
LOC_Os01g04990	1.35336327612617	5.21428077332625e-28	9.83245902055123e-27
LOC_Os06g51270	1.23977548207049	5.52496695385601e-28	1.04118584181217e-26
LOC_Os02g37610	-1.08662	5.7641168824721e-28	1.08558129471995e-26
LOC_Os01g73310	1.03903470710719	5.90684630215792e-28	1.11177374459428e-26
LOC_Os01g56790	-0.723254	5.9989142964298e-28	1.12840431193697e-26
LOC_Os10g33920	1.30093191884312	6.32572572160963e-28	1.18914260536761e-26
LOC_Os08g37320	0.559025002622339	6.61419976252279e-28	1.24260345878254e-26
LOC_Os04g53170	-1.01368	6.70146062835001e-28	1.25821991649317e-26
LOC_Os12g17090	1.29152280312097	6.79707326895392e-28	1.27538421066319e-26
LOC_Os02g45040	-4.38581	6.87277052462438e-28	1.28879277606027e-26
LOC_Os10g38700	-3.09741	7.07054478344615e-28	1.32506278578742e-26
LOC_Os10g21940	0.908091218056878	7.39325299320512e-28	1.3846870876929e-26
LOC_Os03g31090	0.534912689068602	7.59480698053031e-28	1.42156091766037e-26
LOC_Os02g48660	0.538160316663655	7.70279685288221e-28	1.44088726369782e-26
LOC_Os01g46710	-0.57031	7.74317576227551e-28	1.44755030107788e-26
LOC_Os02g51680	1.41735120082609	8.65750005690536e-28	1.61748477721642e-26
LOC_Os01g27730	0.85527965420148	8.80203403760509e-28	1.64347862055124e-26
LOC_Os05g18604	1.75782221820719	8.95140056433662e-28	1.67034232861879e-26
LOC_Os11g05930	-0.728421	9.6547695901683e-28	1.80048725845836e-26
LOC_Os02g27760	0.63676450517522	9.79417064968185e-28	1.82536454951423e-26
LOC_Os09g12660	2.04362471535368	1.03631093045125e-27	1.93021636623425e-26
LOC_Os06g40370	-0.843172	1.05163562595878e-27	1.95756115049953e-26
LOC_Os03g08070	-1.05544	1.0911120694345e-27	2.02980212256391e-26
LOC_Os06g09350	-0.914071	1.153217811006e-27	2.1440264632982e-26
LOC_Os08g24200	0.466862432803868	1.15923760600921e-27	2.15390171193501e-26
LOC_Os03g06940	1.84859364402805	1.20587054976773e-27	2.23917940425734e-26
LOC_Os02g31220	-0.696514	1.36530652856553e-27	2.53368904044229e-26
LOC_Os02g57240	1.52849523772534	1.39675667064268e-27	2.59047261550413e-26
LOC_Os01g27040	0.903386678172983	1.50091232276503e-27	2.78194693535779e-26
LOC_Os03g43750	-1.92132	1.55342471045786e-27	2.87752533454849e-26
LOC_Os12g02094	-0.667357	1.55507480597053e-27	2.8788286852343e-26
LOC_Os07g27930	-0.726318	1.57039849720268e-27	2.90542826587085e-26
LOC_Os09g22440	-0.585027	1.60891482316394e-27	2.97487861771152e-26
LOC_Os03g23010	-0.51692	1.62650997039876e-27	3.00558488819251e-26
LOC_Os10g37830	-0.821087	1.67292680092699e-27	3.08948036290196e-26
LOC_Os12g26960	-0.627005	1.70415401896045e-27	3.14523960198428e-26
LOC_Os02g03640	-0.747464	1.72657002400351e-27	3.18467882656706e-26
LOC_Os12g42220	-2.60549	1.8141343174507e-27	3.34416420603518e-26
LOC_Os04g01890	-2.17853	1.83443154219889e-27	3.37953178604007e-26
LOC_Os06g45500	0.53455294460386	2.0236295824493e-27	3.72583034986549e-26
LOC_Os06g47640	-1.77624	2.02908014361949e-27	3.73360566535574e-26
LOC_Os03g58810	0.792225129879631	2.03384053606905e-27	3.74010240296712e-26
LOC_Os10g36200	1.34909096060917	2.05388657269804e-27	3.77468362508662e-26
LOC_Os06g22080	-0.698318	2.06309727253971e-27	3.78932165709951e-26
LOC_Os02g57260	-0.364743	2.10810265240267e-27	3.86964696894868e-26
LOC_Os12g38970	-0.640138	2.11381126174308e-27	3.87778548475136e-26
LOC_Os01g68320	-0.422097	2.11908493130987e-27	3.8851167734009e-26
LOC_Os06g41360	-0.634752	2.21275842877112e-27	4.05441327527123e-26
LOC_Os02g32970	1.17946689513481	2.25171246364907e-27	4.12330441266407e-26
LOC_Os05g50260	2.63064377368486	2.36155378911355e-27	4.32184236159312e-26
LOC_Os07g48090	1.20788003083714	2.6303111984038e-27	4.81079647688815e-26
LOC_Os03g63510	-1.24491	2.64354514810665e-27	4.83209550629879e-26
LOC_Os02g13370	-2.62334	2.66228761090209e-27	4.8634318302221e-26
LOC_Os03g18180	0.739939573994041	2.71237464670813e-27	4.95195601766354e-26
LOC_Os06g33100	1.53143906918802	2.71776763690701e-27	4.9588254615575e-26
LOC_Os01g59990	0.597818705715419	2.84093208652661e-27	5.18044306617466e-26
LOC_Os07g38280	-0.727996	3.06937877041535e-27	5.5936623535622e-26
LOC_Os01g45910	0.605527791505795	3.2434487902524e-27	5.90734960504893e-26
LOC_Os08g33740	1.73210019409387	3.47362216101255e-27	6.32278226507227e-26
LOC_Os01g05010	1.23949219375095	3.50834438798415e-27	6.38216524550993e-26
LOC_Os03g43410	1.68376186796916	3.51149613420574e-27	6.38408047925892e-26
LOC_Os01g72790	-0.58977	3.64431631263474e-27	6.62159647342283e-26
LOC_Os02g50290	-0.888124	3.73217927935346e-27	6.7771919379591e-26
LOC_Os04g39660	-0.601549	3.88445763219402e-27	7.04950258596739e-26
LOC_Os04g52060	-1.12073	4.21953375745766e-27	7.65303153052071e-26
LOC_Os02g01360	-0.80113	4.39621530098228e-27	7.96872971362795e-26
LOC_Os05g05470	0.66959435125597	4.40216812393364e-27	7.97476746024811e-26
LOC_Os10g36650	1.82554981908555	4.62556221257565e-27	8.37447025343458e-26
LOC_Os02g50960	0.941087806868353	5.01036063098382e-27	9.06574235288542e-26
LOC_Os03g36439	-0.965037	5.06000799522657e-27	9.15013098589842e-26
LOC_Os08g42630	-2.37964	5.18107632187572e-27	9.36349479537563e-26
LOC_Os02g54180	-1.17748	5.33617933259324e-27	9.63807782542494e-26
LOC_Os03g10210	-1.37214	5.34691465839235e-27	9.65173627594432e-26
LOC_Os03g16369	-0.599509	5.66990555204739e-27	1.02286979401586e-25
LOC_Os01g46590	-0.819406	5.70606585780156e-27	1.0287830416769e-25
LOC_Os02g39200	0.954129154985732	5.77572720776102e-27	1.04072582198613e-25
LOC_Os07g03590	0.913266369170697	6.23994729997254e-27	1.12370773875645e-25
LOC_Os03g20420	-0.612381	6.62693019505643e-27	1.19269058469134e-25
LOC_Os04g01300	0.506694285721976	6.68232725982436e-27	1.20194953243535e-25
LOC_Os07g22600	0.59545330269639	6.82640603666156e-27	1.2271392790254e-25
LOC_Os04g25400	-0.612649	7.03415443477604e-27	1.26373798752598e-25
LOC_Os03g15340	2.30970381206137	7.32438530988852e-27	1.31510332695141e-25
LOC_Os06g14510	0.661293885511224	7.33976073927654e-27	1.31708650528516e-25
LOC_Os11g37210	1.40079885101247	7.74228019064514e-27	1.38849760777513e-25
LOC_Os01g05650	-0.501001	8.00736595448273e-27	1.43519176706863e-25
LOC_Os04g32030	1.38825032311558	8.32378131185841e-27	1.49102551461417e-25
LOC_Os01g16910	0.885541259809134	1.02537621568519e-26	1.83565879789762e-25
LOC_Os06g38960	1.77439092180909	1.03611342613364e-26	1.85378976289887e-25
LOC_Os05g05520	-2.59192	1.05518277286741e-26	1.88679830802676e-25
LOC_Os03g06190	-1.03214	1.0680753902962e-26	1.90872979267034e-25
LOC_Os02g55870	1.44541170318756	1.08656188375958e-26	1.94062632157554e-25
LOC_Os01g53090	-1.47562	1.11304634070782e-26	1.98676159031508e-25
LOC_Os01g07500	1.07846708342728	1.11989097857839e-26	1.99780668647743e-25
LOC_Os08g37800	-0.689503	1.12302223674178e-26	2.00221830907023e-25
LOC_Os10g41820	-1.07686	1.13049678103995e-26	2.01436380152964e-25
LOC_Os03g28940	0.646152884349037	1.15049622148131e-26	2.04879936022105e-25
LOC_Os05g27660	-0.699803	1.17785736641627e-26	2.09629664464114e-25
LOC_Os09g33650	1.77285462080772	1.21804158812647e-26	2.16654695581607e-25
LOC_Os10g42840	0.674847030466529	1.28330322039809e-26	2.28129460851129e-25
LOC_Os12g34500	1.85002409706147	1.29649993744336e-26	2.30340783278488e-25
LOC_Os02g39010	-0.635752	1.38492728301691e-26	2.45907461997911e-25
LOC_Os03g14010	2.01929884190984	1.38824376643796e-26	2.46352522753659e-25
LOC_Os05g03830	0.963338681687529	1.61289805169507e-26	2.86051936678467e-25
LOC_Os10g41520	-0.75744	1.61440638332715e-26	2.86152590648476e-25
LOC_Os03g20720	-0.864437	1.6587158201394e-26	2.93835179879791e-25
LOC_Os10g31540	2.4258997129339	1.67246225925791e-26	2.96097858426011e-25
LOC_Os06g06160	-0.529901	1.69214701792961e-26	2.99408631165485e-25
LOC_Os02g03130	1.75909353743421	1.70925153522685e-26	3.02259271485232e-25
LOC_Os05g40770	-0.495116	1.72974241192814e-26	3.05705085422466e-25
LOC_Os02g34430	1.35765269264559	1.73129084484572e-26	3.05801058866593e-25
LOC_Os10g33210	-0.643266	1.73914650248414e-26	3.0701033093185e-25
LOC_Os04g46280	-1.61215	1.76972252891746e-26	3.12226684684184e-25
LOC_Os11g37890	0.597300364039981	2.00283316012483e-26	3.53148831294822e-25
LOC_Os03g11410	0.512851979082429	2.01072169976816e-26	3.54334363963779e-25
LOC_Os02g26770	2.63765053664827	2.01549131152567e-26	3.54969216742123e-25
LOC_Os05g28750	0.873617731048239	2.0546625812971e-26	3.61658663615351e-25
LOC_Os08g24300	0.571510383974342	2.09630907836053e-26	3.68775806404938e-25
LOC_Os07g31300	0.624629784495934	2.20320425611365e-26	3.87356419965046e-25
LOC_Os01g19870	1.33411448619877	2.2448006697653e-26	3.94441693654428e-25
LOC_Os01g49200	1.85587922226773	2.32035782594654e-26	4.074826999653e-25
LOC_Os04g56400	1.49336667031466	2.36609184142697e-26	4.15274376508036e-25
LOC_Os01g66130	-1.24399	2.3814748069149e-26	4.17733204885373e-25
LOC_Os08g37920	-0.720154	2.40748816892831e-26	4.22052796231258e-25
LOC_Os02g46920	-0.627968	2.41281479702286e-26	4.22742942777923e-25
LOC_Os03g42110	0.609538138509808	2.4973928021929e-26	4.37309726375931e-25
LOC_Os05g01380	-1.07585	2.50260910067535e-26	4.37970991980101e-25
LOC_Os01g42650	0.793905181554761	2.52748912284023e-26	4.42070782980496e-25
LOC_Os12g42200	-0.57048	2.59861513586357e-26	4.5424987340475e-25
LOC_Os02g49230	-0.985972	2.60501896663387e-26	4.55107736296013e-25
LOC_Os12g01560	1.62098231289523	2.65206204791259e-26	4.63060386046551e-25
LOC_Os06g50940	0.746903017832122	2.9311082170732e-26	5.11489314575436e-25
LOC_Os01g37950	1.01440481067553	2.99606853883993e-26	5.22525347920616e-25
LOC_Os10g13670	-0.586036	3.22038969756248e-26	5.61325920006077e-25
LOC_Os02g34730	-1.08434	3.34981092436717e-26	5.83550109252875e-25
LOC_Os03g56410	-0.780648	3.37611828587837e-26	5.87796300991851e-25
LOC_Os01g73500	-0.795674	3.387770425899e-26	5.89487558776568e-25
LOC_Os05g49890	0.508867280842938	3.41103505090192e-26	5.93196352820085e-25
LOC_Os03g54890	0.462366361129784	3.43861759352798e-26	5.97651386998554e-25
LOC_Os02g05744	1.11573809894742	3.52356353661391e-26	6.12065725469153e-25
LOC_Os06g03580	-0.671428	3.53891926051608e-26	6.14382238743476e-25
LOC_Os10g16974	1.16714965135851	3.71033882926421e-26	6.43774477073019e-25
LOC_Os11g19864	-1.50985	4.06815561763108e-26	7.0545622158419e-25
LOC_Os02g36150	1.80223908252338	4.0744414829057e-26	7.06143658940512e-25
LOC_Os07g46380	-1.10687	4.17523256339368e-26	7.23199736037484e-25
LOC_Os11g11390	0.513375301142776	4.23579191000239e-26	7.33271751477704e-25
LOC_Os04g44430	-0.573227	4.3945811533631e-26	7.6032753333727e-25
LOC_Os09g37834	0.892803670229427	4.4819590127772e-26	7.75004350952992e-25
LOC_Os04g37980	-1.09946	4.59111456350836e-26	7.93428071384489e-25
LOC_Os10g42710	-0.386679	5.1681248153817e-26	8.92638752894093e-25
LOC_Os02g50330	-0.960919	5.97822672482314e-26	1.03197357583553e-24
LOC_Os12g37840	0.485025437215962	6.05402061132158e-26	1.0444644975267e-24
LOC_Os05g02260	-0.615062	6.21978911079421e-26	1.07245524713105e-24
LOC_Os03g56241	0.754311827496151	6.72253694943071e-26	1.15848546092852e-24
LOC_Os07g44110	-1.15301	6.82728371868046e-26	1.17587011091384e-24
LOC_Os03g18130	0.407274288392337	6.89250416011419e-26	1.18643127636691e-24
LOC_Os05g08830	1.31669542396906	6.90008252005158e-26	1.18706397019168e-24
LOC_Os06g51510	0.499849780462872	6.96282783989944e-26	1.19718129778621e-24
LOC_Os03g43684	0.884869822272918	7.00685826729229e-26	1.20407119241787e-24
LOC_Os12g01390	0.536847310430432	7.26960940915177e-26	1.24851744657685e-24
LOC_Os07g44610	-0.483776	7.32454343183356e-26	1.25724217281405e-24
LOC_Os01g07630	1.35069561026346	7.33291719024543e-26	1.25796959536664e-24
LOC_Os07g45064	-0.510597	7.44615861292637e-26	1.27667621404041e-24
LOC_Os03g12860	-0.998064	7.721514568574e-26	1.32314133587463e-24
LOC_Os05g32500	1.18536398471432	8.18653686519925e-26	1.40203662889584e-24
LOC_Os03g06420	-0.52007	8.22051806601584e-26	1.40706402642621e-24
LOC_Os07g35290	0.720041610770942	8.52575552576658e-26	1.45848920175318e-24
LOC_Os08g12840	0.985691460003466	8.78002497566868e-26	1.50114243766126e-24
LOC_Os11g14430	-0.615675	9.13532252461669e-26	1.56101106690304e-24
LOC_Os03g09900	0.515975747678029	9.24678427872759e-26	1.57917007648388e-24
LOC_Os01g61044	-1.34735	9.26693034132888e-26	1.58086078467089e-24
LOC_Os09g32520	1.0458	9.26707910004011e-26	1.58086078467089e-24
LOC_Os11g14160	-0.745063	9.31115343966125e-26	1.58748903038529e-24
LOC_Os01g19470	0.595230152319558	9.4499804219169e-26	1.61025548746792e-24
LOC_Os01g01450	0.648275382644455	9.47404417860603e-26	1.61345200300381e-24
LOC_Os01g61460	0.761095294802216	1.01255125029584e-25	1.72343362221591e-24
LOC_Os07g04240	0.485727766220252	1.01686908722456e-25	1.7298148857395e-24
LOC_Os04g40630	-1.04084	1.02362915416644e-25	1.74034121593776e-24
LOC_Os03g25450	1.44712362008492	1.07686465037708e-25	1.82975256991902e-24
LOC_Os08g27170	-1.67828	1.07742203206371e-25	1.82975256991902e-24
LOC_Os09g16760	-1.47252	1.09325171193876e-25	1.85559955749606e-24
LOC_Os06g16160	-1.64254	1.0983907536077e-25	1.86328238492649e-24
LOC_Os02g07060	0.724967221130029	1.13820030258321e-25	1.92973803809203e-24
LOC_Os02g42440	-0.766254	1.14676986917548e-25	1.94318397442014e-24
LOC_Os03g27390	-0.537146	1.17557291177154e-25	1.9908811628309e-24
LOC_Os02g16630	0.845306236109782	1.22045792083299e-25	2.06574558264086e-24
LOC_Os12g44150	-0.640149	1.25476084543708e-25	2.122625465785e-24
LOC_Os05g13780	-0.625646	1.2577613355389e-25	2.12651855373825e-24
LOC_Os05g39380	-0.636539	1.26469888537443e-25	2.13706007208603e-24
LOC_Os02g44310	1.55306629706063	1.29312414694925e-25	2.1838791812109e-24
LOC_Os12g32986	0.7383730656274	1.33029551971453e-25	2.24540890830395e-24
LOC_Os01g66680	1.36511148095976	1.38579637912829e-25	2.3377916066315e-24
LOC_Os02g17970	-0.86172	1.48557413252157e-25	2.50472410281463e-24
LOC_Os01g38950	-0.516707	1.53208226994713e-25	2.58170716469318e-24
LOC_Os02g16909	-1.49604	1.56355082697113e-25	2.63327585565636e-24
LOC_Os01g16140	2.91891415663183	1.59404630755306e-25	2.6831495567534e-24
LOC_Os10g31320	0.964924411650802	1.73870838948191e-25	2.92396314853823e-24
LOC_Os03g02514	0.883903417117014	1.7390351577149e-25	2.92396314853823e-24
LOC_Os04g47810	-0.938814	1.7471460228824e-25	2.93597753767906e-24
LOC_Os02g09490	0.580958566850539	1.77742046249899e-25	2.9852026939464e-24
LOC_Os08g04440	-0.516911	1.81408574761046e-25	3.04510110923399e-24
LOC_Os04g31070	-0.419537	1.88265032664689e-25	3.15844965997198e-24
LOC_Os12g07370	-1.99662	1.96160518466989e-25	3.28909499983018e-24
LOC_Os06g02019	-3.0456	2.11608907588888e-25	3.54616888882844e-24
LOC_Os07g22350	0.59436086348278	2.18510655779296e-25	3.65981283380124e-24
LOC_Os07g03770	-1.32465	2.20194565677409e-25	3.68598674168634e-24
LOC_Os02g32290	-1.05636	2.25322513010507e-25	3.76975223087326e-24
LOC_Os05g47540	2.84818694919128	2.25461179432607e-25	3.76999847917657e-24
LOC_Os04g39020	-0.459715	2.37647980207198e-25	3.97159393735283e-24
LOC_Os02g35600	-0.844566	2.5051106659445e-25	4.1842639217665e-24
LOC_Os06g47600	2.08747176081282	2.50908110130328e-25	4.18859554210979e-24
LOC_Os01g70380	-0.520079	2.51592726726943e-25	4.19772044768332e-24
LOC_Os11g07440	0.685769553882327	2.52262592711732e-25	4.20658937495617e-24
LOC_Os01g24550	2.16845313438431	2.54813933581799e-25	4.24680581031452e-24
LOC_Os03g30420	-1.70115	2.69747857170354e-25	4.49323703378613e-24
LOC_Os10g20090	0.842838136319992	2.92873834595815e-25	4.87578026987756e-24
LOC_Os12g30020	-0.583444	3.0383359549392e-25	5.055471904017e-24
LOC_Os06g12030	-0.716555	3.055969467844e-25	5.08203211229869e-24
LOC_Os01g16960	0.948254921760069	3.15833431942838e-25	5.24939326009474e-24
LOC_Os07g11300	-0.966321	3.16095853560543e-25	5.25088557176268e-24
LOC_Os09g25460	-0.54756	3.2401500561748e-25	5.37949804086314e-24
LOC_Os01g72834	-0.734401	3.26435086398876e-25	5.41672099722216e-24
LOC_Os02g02840	1.16089334661634	3.30013227844663e-25	5.47310923561792e-24
LOC_Os02g25900	-0.695929	3.35293217331381e-25	5.55764495822959e-24
LOC_Os01g02880	0.564357766308464	3.40992022812666e-25	5.64902688772878e-24
LOC_Os09g17930	1.27828684270746	3.49850799545744e-25	5.79263033150973e-24
LOC_Os07g41640	-0.646726	3.51675645746897e-25	5.81967706258848e-24
LOC_Os07g41140	-0.938394	3.67527422940931e-25	6.07869173255647e-24
LOC_Os06g46060	-0.959255	3.67807798991355e-25	6.08002283376145e-24
LOC_Os01g65900	-0.492372	3.83724533161702e-25	6.33968788736899e-24
LOC_Os08g02490	-0.620221	3.9929162227751e-25	6.59329749358998e-24
LOC_Os02g38120	1.98930548340963	4.08069070812966e-25	6.73457887023721e-24
LOC_Os02g39920	-0.566541	4.10981681841788e-25	6.77896899940338e-24
LOC_Os06g37440	0.589219439467687	4.18168275728314e-25	6.89377033851079e-24
LOC_Os02g40810	-0.820559	4.29850793680356e-25	7.08252531992509e-24
LOC_Os05g06770	0.500212101614464	4.36026194605333e-25	7.18038588798906e-24
LOC_Os11g29190	0.565773016203977	4.46834080707881e-25	7.35438603831759e-24
LOC_Os02g39820	0.935025678788391	4.57152938747442e-25	7.52015348022833e-24
LOC_Os12g37860	-0.586332	4.58366305828176e-25	7.53603759895664e-24
LOC_Os10g06130	-0.601299	4.65106334518822e-25	7.64271975727957e-24
LOC_Os12g07260	0.876245199794036	4.7747092948828e-25	7.84166079444682e-24
LOC_Os12g07150	-0.805965	4.81833713815707e-25	7.90904168344227e-24
LOC_Os11g31540	0.358691096934991	4.84751231997149e-25	7.95263941339013e-24
LOC_Os06g06790	1.46708849103991	4.8505882668036e-25	7.95339583412929e-24
LOC_Os02g19770	-1.18827	4.94704563905191e-25	8.10718427572214e-24
LOC_Os11g06880	2.03155181578197	5.1926351079745e-25	8.50507212946431e-24
LOC_Os01g16170	-0.681354	5.21145063464688e-25	8.53129615196015e-24
LOC_Os02g11740	-0.473119	5.50499117168543e-25	9.00698286594858e-24
LOC_Os02g05790	-0.780949	5.56390520779529e-25	9.09848068818826e-24
LOC_Os01g03620	2.50454616385274	6.26931631568407e-25	1.02465086006366e-23
LOC_Os11g34150	-0.731987	6.38324727766619e-25	1.04271132759127e-23
LOC_Os07g11150	-0.620438	6.71381853815792e-25	1.0961218714794e-23
LOC_Os08g36320	-0.633973	6.84458548846579e-25	1.11687184665867e-23
LOC_Os03g16140	-0.552161	7.41398162767712e-25	1.20913493398084e-23
LOC_Os10g41960	0.508238038172395	7.64189952784346e-25	1.24563781371322e-23
LOC_Os02g47140	0.590453449625297	8.26864382315573e-25	1.34707589997378e-23
LOC_Os09g24990	-0.658964	8.42264274657517e-25	1.37142988104834e-23
LOC_Os05g50890	0.760326735412208	9.39177324188857e-25	1.52841185085759e-23
LOC_Os02g50490	1.15757442799867	9.42852788423309e-25	1.53357274934136e-23
LOC_Os03g49900	-0.551496	9.44728729880346e-25	1.53580272838271e-23
LOC_Os10g26700	2.18133595649818	9.67471060724457e-25	1.57193374909162e-23
LOC_Os02g31030	-0.89738	9.76937665271714e-25	1.58646748675411e-23
LOC_Os06g48780	0.679373932334576	9.80431377394806e-25	1.59129139673642e-23
LOC_Os05g38640	-0.63488	9.93585635320972e-25	1.61178136980921e-23
LOC_Os09g04110	0.746986804167182	1.00120931316557e-24	1.62299611208733e-23
LOC_Os03g20530	-0.689314	1.00156618305757e-24	1.62299611208733e-23
LOC_Os05g43690	1.66925377017799	1.00864727336035e-24	1.63360039757872e-23
LOC_Os08g03420	3.4120479313784	1.05454141027926e-24	1.70702136961437e-23
LOC_Os02g39910	-1.80242	1.07257063610063e-24	1.73528236529983e-23
LOC_Os02g36340	0.565172965726818	1.10653741929701e-24	1.78928453723222e-23
LOC_Os01g54600	-0.565895	1.15447603984866e-24	1.86580994835477e-23
LOC_Os11g48110	-3.16138	1.1618111420067e-24	1.8763117951426e-23
LOC_Os05g07210	-0.776659	1.16220785838002e-24	1.8763117951426e-23
LOC_Os12g40840	0.582812387626826	1.17985982939825e-24	1.90379928758499e-23
LOC_Os07g02570	1.13168628577814	1.18556537135918e-24	1.91199132212411e-23
LOC_Os01g42690	2.03118558211165	1.26724440979523e-24	2.04263412656766e-23
LOC_Os07g31830	-1.76915	1.27823293205e-24	2.0592549184975e-23
LOC_Os05g02310	1.58561352367767	1.38252010972422e-24	2.22608425925738e-23
LOC_Os01g73514	-0.499243	1.40416962241185e-24	2.25974726112587e-23
LOC_Os07g12530	-0.889215	1.53541368578735e-24	2.46965323463289e-23
LOC_Os03g56060	1.53292398640257	1.60411464289469e-24	2.57879233500449e-23
LOC_Os02g32590	-1.32596	1.61156424336524e-24	2.58939979007909e-23
LOC_Os04g52390	-0.799733	1.6358394637711e-24	2.62701653273821e-23
LOC_Os10g31500	2.3709109937956	1.71376523721294e-24	2.75070625092712e-23
LOC_Os01g15020	-0.396689	1.71631977495193e-24	2.7533534955136e-23
LOC_Os03g21950	0.648224737284615	1.73779449387952e-24	2.78633407094567e-23
LOC_Os03g61360	-1.47878	1.74823503607983e-24	2.80159730544806e-23
LOC_Os02g57060	-1.78551	1.76303358770873e-24	2.82382462368345e-23
LOC_Os05g02510	-0.556796	1.84257561487269e-24	2.94967262641935e-23
LOC_Os10g35060	-0.663044	1.84609285299397e-24	2.95374856479035e-23
LOC_Os01g60790	0.819475239992082	1.85992788111429e-24	2.97432000168098e-23
LOC_Os03g15530	3.30218	1.87278930851587e-24	2.99331369457796e-23
LOC_Os01g72330	1.14397065129811	1.8802555941636e-24	3.00366881050841e-23
LOC_Os03g38590	-0.482201	1.89802874551691e-24	3.03046941331455e-23
LOC_Os01g59910	-1.11917	1.90097188001707e-24	3.03357611241339e-23
LOC_Os06g36360	-0.406818	2.00098437352203e-24	3.19150187231494e-23
LOC_Os07g08840	0.361103196957155	2.01453227942678e-24	3.21142630036923e-23
LOC_Os01g59740	0.924706066514065	2.02810157882665e-24	3.23136394036623e-23
LOC_Os08g23440	0.552552433883557	2.04229855795237e-24	3.2522802585696e-23
LOC_Os01g14670	0.9263338295868	2.06019191809086e-24	3.27905794770547e-23
LOC_Os11g14420	-0.660721	2.14703269848824e-24	3.41548883667459e-23
LOC_Os02g47650	-0.841134	2.19857150743298e-24	3.49564824725988e-23
LOC_Os03g13870	1.24845767445941	2.22571741157554e-24	3.53696033388097e-23
LOC_Os06g01360	-0.763196	2.24136804877362e-24	3.55997130921662e-23
LOC_Os06g28050	-2.15019	2.34746922943991e-24	3.72654614210043e-23
LOC_Os04g52050	-1.04996	2.46643715273558e-24	3.91336215115313e-23
LOC_Os06g36160	0.593605242074876	2.56828557118586e-24	4.0728349287377e-23
LOC_Os06g12250	1.79176640916413	2.75453822973409e-24	4.36592156308453e-23
LOC_Os05g42180	-1.26872	2.89907217619297e-24	4.5926135057857e-23
LOC_Os02g48964	-0.56164	2.92556846650141e-24	4.63217545430019e-23
LOC_Os03g64230	2.19139390494741	2.95296273375895e-24	4.67311730020876e-23
LOC_Os09g38020	-1.31994	3.15247797015912e-24	4.98625948727819e-23
LOC_Os08g42440	-0.787188	3.24303142627005e-24	5.12682140651922e-23
LOC_Os01g58220	0.536726219387135	3.27970640072897e-24	5.18210648751026e-23
LOC_Os02g15700	-1.17815	3.29268362218576e-24	5.19990991964704e-23
LOC_Os12g37970	-0.718599	3.41939477536583e-24	5.39721388103409e-23
LOC_Os02g53420	0.467652591260885	3.55692093877498e-24	5.61137485859853e-23
LOC_Os06g43760	0.554380813994989	3.80651640532611e-24	6.00202192765158e-23
LOC_Os08g02410	0.614742040794616	3.9553453768884e-24	6.23346036183614e-23
LOC_Os05g46550	1.56258622510122	3.97797198576264e-24	6.26587239352441e-23
LOC_Os02g58139	-0.83331	3.99440452410766e-24	6.28849937915418e-23
LOC_Os04g34100	0.585356769022737	4.02843082467006e-24	6.33878696136391e-23
LOC_Os01g21250	0.764080215581953	4.33969842453074e-24	6.82503967324338e-23
LOC_Os02g16500	1.9934135937931	4.82033925442695e-24	7.57702525905169e-23
LOC_Os04g53230	1.07702697002751	4.87258663159778e-24	7.65519602203916e-23
LOC_Os09g20820	0.978064326960186	5.03366356022228e-24	7.90417712172024e-23
LOC_Os01g45700	1.45551785303943	5.19725012677576e-24	8.15684003384992e-23
LOC_Os03g22770	-0.801725	5.2711633591982e-24	8.2685768299831e-23
LOC_Os01g37800	-0.459411	5.6155868615176e-24	8.80431391649069e-23
LOC_Os03g02590	-1.82365	5.64473130089272e-24	8.84544808078067e-23
LOC_Os02g26810	1.89064924517357	5.7917763444746e-24	9.07119821284961e-23
LOC_Os09g06230	0.910667795722066	5.8780158414855e-24	9.20153009956886e-23
LOC_Os01g04300	1.68126024445349	6.08639028406337e-24	9.52282134156746e-23
LOC_Os10g21930	-0.741205	6.09468872328408e-24	9.53090242711613e-23
LOC_Os10g42960	4.55156273554879	6.18782792141954e-24	9.67158140071412e-23
LOC_Os05g37140	0.830643223672457	6.48028582906959e-24	1.01234912058028e-22
LOC_Os10g31680	1.1942680233261	6.74658418023584e-24	1.05340916029802e-22
LOC_Os11g39020	-0.913644	6.7935546024143e-24	1.0601988547308e-22
LOC_Os07g23660	-0.519958	7.13097941432643e-24	1.11228651213412e-22
LOC_Os03g13300	2.15380693579517	7.14945453906256e-24	1.11459666458292e-22
LOC_Os06g48180	1.6077663259183	7.16134243879989e-24	1.11587803083267e-22
LOC_Os08g41270	-0.834109	7.22727461478397e-24	1.12557493437414e-22
LOC_Os12g41710	-0.658484	7.34209194528132e-24	1.14287138489087e-22
LOC_Os05g02060	1.51106260629823	7.55998711468498e-24	1.17618704900388e-22
LOC_Os05g39320	3.43397259551016	7.78265256856823e-24	1.21021043213482e-22
LOC_Os04g49670	1.41474158357234	7.90335680667531e-24	1.22835207272272e-22
LOC_Os03g59050	0.563911496757197	8.03423995945801e-24	1.24805639737934e-22
LOC_Os01g73790	1.13026454556405	8.14395037432053e-24	1.26445326485622e-22
LOC_Os12g07540	-1.00626	8.32180155385752e-24	1.29140773501087e-22
LOC_Os03g15010	-0.838886	8.72005533225245e-24	1.35252015801015e-22
LOC_Os03g51970	1.77024523442333	9.0408956209501e-24	1.40156922123761e-22
LOC_Os10g41560	-0.504947	9.0649221364765e-24	1.40457805248634e-22
LOC_Os01g21450	-0.721411	9.56895194709289e-24	1.48192078626669e-22
LOC_Os05g02250	1.0902089195328	1.0094234765133e-23	1.56247452730934e-22
LOC_Os08g41390	0.472359974813955	1.04253551584446e-23	1.61290743895855e-22
LOC_Os10g32400	-2.0637	1.11564403925323e-23	1.72513620223317e-22
LOC_Os01g03390	-0.378192	1.19146743382004e-23	1.84144682251373e-22
LOC_Os01g64020	-0.82406	1.26153354759844e-23	1.94874577875846e-22
LOC_Os03g12350	-0.537515	1.29682737667958e-23	2.00224880655259e-22
LOC_Os07g15490	-0.916702	1.33111465447078e-23	2.05414425826399e-22
LOC_Os05g25430	0.690359264617777	1.33873202373379e-23	2.0648515838685e-22
LOC_Os11g02440	1.17473573835169	1.38773111844814e-23	2.13934261017327e-22
LOC_Os04g27670	-2.02084	1.39022369677796e-23	2.14209949144876e-22
LOC_Os10g35500	1.33376794644078	1.41947430695287e-23	2.18606230482422e-22
LOC_Os02g45810	0.918882282218315	1.42067547229438e-23	2.18680491727256e-22
LOC_Os02g08010	-0.495965	1.55014444495182e-23	2.38488585926427e-22
LOC_Os03g50130	-0.75901	1.6143523667815e-23	2.48241362932387e-22
LOC_Os07g10610	-0.889568	1.65507485837462e-23	2.5437471901123e-22
LOC_Os02g20410	-0.682177	1.66603869097337e-23	2.55930468811343e-22
LOC_Os06g50180	1.08203	1.67004164828104e-23	2.56415884775953e-22
LOC_Os05g11770	-0.526428	1.67434661317181e-23	2.56947157347294e-22
LOC_Os05g41390	1.81638148197567	1.68900241068855e-23	2.59065543739299e-22
LOC_Os05g34260	-0.645168	1.72644881280895e-23	2.6467574138305e-22
LOC_Os07g38810	1.0933947200571	1.91898969544284e-23	2.94045292577277e-22
LOC_Os11g37700	0.490438750597443	1.93850838352653e-23	2.96886560892965e-22
LOC_Os02g52960	-0.569312	1.94249722702396e-23	2.97347738586616e-22
LOC_Os03g12530	1.30372550426253	1.97472669853622e-23	3.02129211582886e-22
LOC_Os03g49490	-0.787578	1.99433954997385e-23	3.04976529673227e-22
LOC_Os02g55600	-2.11294	2.01530501111239e-23	3.08027724713539e-22
LOC_Os02g12090	1.84915122198424	2.0271063307711e-23	3.09675872208608e-22
LOC_Os01g48940	-2.16005	2.04811950315571e-23	3.12728929758957e-22
LOC_Os03g63700	1.64867544855638	2.19046087756066e-23	3.34295323893051e-22
LOC_Os02g47570	0.733435952440165	2.33012833129493e-23	3.55432213263123e-22
LOC_Os02g16540	-1.16547	2.51722811530403e-23	3.83779500526754e-22
LOC_Os07g41750	0.805784762666593	2.53475628173766e-23	3.86258251830325e-22
LOC_Os03g25070	-0.557751	2.67226605787767e-23	4.07008735184813e-22
LOC_Os05g31490	0.910273739676703	2.83382061317875e-23	4.31398837689914e-22
LOC_Os01g55830	0.483036931427508	3.05855771439212e-23	4.65378146277892e-22
[truncated: 28,417 more rows]

## Sheet: Table 4
Table 4. Gene Ontology (GO) analysis of DEGs between oswrky53-osarf18-osrr22 and oswrky53-osrr22 roots under salt stress.
category	term	ontology	numDEInCat	numInCat	over_represented_pvalue	over_represented_FDR	GeneNumber(Up)	GeneNumber(Down)
GO:0004601	peroxidase activity	MF	56	182	1.06012e-26	1.99196e-23	55	1
GO:0006979	response to oxidative stress	BP	55	224	6.55284e-21	8.20852e-18	54	1
GO:0048046	apoplast	CC	64	303	1.48646e-19	1.39653e-16	52	12
GO:0009505	plant-type cell wall	CC	49	191	1.35047e-18	9.97396e-16	48	1
GO:0005576	extracellular region	CC	46	190	1.59244e-18	9.97396e-16	46	0
GO:0005874	microtubule	CC	32	82	1.92492e-18	1.03341e-15	32	0
GO:0020037	heme binding	MF	90	581	4.06463e-18	1.90936e-15	76	14
GO:0055114	oxidation-reduction process	BP	172	1592	3.95264e-16	1.65045e-13	141	31
GO:0007018	microtubule-based movement	BP	25	61	4.74053e-15	1.78149e-12	25	0
GO:0004553	hydrolase activity, hydrolyzing O-glycosyl compounds	MF	53	278	1.14859e-14	3.924e-12	50	3
GO:0005975	carbohydrate metabolic process	BP	67	431	2.15658e-13	6.75369e-11	61	6
GO:0005875	microtubule associated complex	CC	24	68	3.25706e-13	9.4154e-11	24	0
GO:0005618	cell wall	CC	56	390	3.28689e-11	8.82295e-09	55	1
GO:0009535	chloroplast thylakoid membrane	CC	43	274	6.67016e-11	1.6711e-08	3	40
GO:0019953	sexual reproduction	BP	12	20	7.87006e-11	1.84848e-08	12	0
GO:0003777	microtubule motor activity	MF	19	52	8.39502e-11	1.85579e-08	19	0
GO:0005886	plasma membrane	CC	157	1616	1.83564e-10	3.65025e-08	142	15
GO:0009664	plant-type cell wall organization	BP	15	39	1.84552e-10	3.65025e-08	15	0
GO:0046872	metal ion binding	MF	88	819	7.47858e-10	1.40523e-07	72	16
GO:0006073	cellular glucan metabolic process	BP	13	28	9.93902e-10	1.77861e-07	13	0
GO:0016762	xyloglucan:xyloglucosyl transferase activity	MF	13	29	1.72422e-09	2.94529e-07	13	0
GO:0009765	photosynthesis, light harvesting	BP	8	10	4.87231e-09	7.96093e-07	0	8
GO:0015979	photosynthesis	BP	20	90	1.06186e-08	1.66269e-06	2	18
GO:0005507	copper ion binding	MF	38	253	1.70841e-08	2.56808e-06	36	2
GO:0042555	MCM complex	CC	6	6	6.99776e-08	1.01145e-05	6	0
GO:0016757	transferase activity, transferring glycosyl groups	MF	22	98	7.82268e-08	1.0888e-05	20	2
GO:0016760	cellulose synthase (UDP-forming) activity	MF	12	30	9.37285e-08	1.25797e-05	12	0
GO:0006270	DNA replication initiation	BP	7	9	1.38837e-07	1.79913e-05	7	0
GO:0046658	anchored component of plasma membrane	CC	12	33	2.84171e-07	3.55971e-05	11	1
GO:0030244	cellulose biosynthetic process	BP	13	39	3.45264e-07	4.18549e-05	13	0
GO:0008017	microtubule binding	MF	11	28	4.07159e-07	4.78157e-05	11	0
GO:0003678	DNA helicase activity	MF	6	7	4.62922e-07	5.27169e-05	6	0
GO:0010287	plastoglobule	CC	15	57	6.08682e-07	6.72773e-05	2	13
GO:0016021	integral component of membrane	CC	121	1331	6.63009e-07	7.11882e-05	113	8
GO:0005819	spindle	CC	9	19	7.37274e-07	7.69632e-05	9	0
GO:0009524	phragmoplast	CC	12	36	9.55678e-07	9.70659e-05	12	0
GO:0010114	response to red light	BP	9	23	2.6618e-06	0.000263238	3	6
GO:0006949	syncytium formation	BP	6	10	6.21174e-06	0.000598557	6	0
GO:0009538	photosystem I reaction center	CC	4	4	6.61237e-06	0.000621232	0	4
GO:0032508	DNA duplex unwinding	BP	7	14	6.78839e-06	0.000622214	7	0
GO:0004672	protein kinase activity	MF	40	334	1.02994e-05	0.000921556	36	4
GO:0003959	NADPH dehydrogenase activity	MF	4	4	1.50745e-05	0.00131744	0	4
GO:0006833	water transport	BP	5	8	2.68443e-05	0.00229275	5	0
GO:0004565	beta-galactosidase activity	MF	7	16	3.05862e-05	0.00255429	6	1
GO:0009941	chloroplast envelope	CC	37	306	3.42877e-05	0.00280116	15	22
GO:0009637	response to blue light	BP	7	17	3.54149e-05	0.00283168	1	6
GO:0080170	hydrogen peroxide transmembrane transport	BP	4	5	4.05622e-05	0.00317568	4	0
GO:0009834	plant-type secondary cell wall biogenesis	BP	5	8	5.02621e-05	0.00385479	5	0
GO:0009543	chloroplast thylakoid lumen	CC	8	26	5.70943e-05	0.00429121	0	8
GO:0005200	structural constituent of cytoskeleton	MF	6	13	7.73417e-05	0.00569902	6	0
GO:0016020	membrane	CC	169	2287	9.89719e-05	0.00715262	140	29
GO:0009654	photosystem II oxygen evolving complex	CC	7	24	0.000116947	0.00829219	0	7
GO:0008266	poly(U) RNA binding	MF	6	16	0.000146541	0.0101982	0	6
GO:0006260	DNA replication	BP	12	60	0.000214456	0.0145114	12	0
GO:0046274	lignin catabolic process	BP	7	21	0.000220103	0.0145114	7	0
GO:0052716	hydroquinone:oxygen oxidoreductase activity	MF	7	21	0.000220103	0.0145114	7	0
GO:0008569	ATP-dependent microtubule motor activity, minus-end-directed	MF	4	6	0.000227111	0.0147153	4	0
GO:0005524	ATP binding	MF	220	2885	0.000231306	0.014733	183	37
GO:0005215	transporter activity	MF	24	186	0.000249946	0.0156549	22	2
GO:0042547	cell wall modification involved in multidimensional cell growth	BP	3	3	0.000261502	0.0161102	3	0
GO:0030001	metal ion transport	BP	10	54	0.000267014	0.0161845	10	0
GO:0000786	nucleosome	CC	9	48	0.000285434	0.0170264	9	0
GO:0009574	preprophase band	CC	5	11	0.000322766	0.0189524	5	0
GO:0009624	response to nematode	BP	15	89	0.000341508	0.0197444	15	0
GO:0030042	actin filament depolymerization	BP	4	9	0.000352572	0.0200752	4	0
GO:0006644	phospholipid metabolic process	BP	3	4	0.000411953	0.0231062	3	0
GO:0031982	vesicle	CC	3	4	0.000474755	0.025857	3	0
GO:0090344	negative regulation of cell aging	BP	3	4	0.000474755	0.025857	3	0
GO:0010218	response to far red light	BP	6	18	0.000484148	0.0259918	0	6
GO:0016308	1-phosphatidylinositol-4-phosphate 5-kinase activity	MF	4	7	0.000508297	0.0269039	4	0
GO:0007017	microtubule-based process	BP	7	27	0.000538266	0.0280945	7	0
GO:0016788	hydrolase activity, acting on ester bonds	MF	24	212	0.000612513	0.0315318	21	3
GO:0000910	cytokinesis	BP	7	26	0.000651478	0.0330845	7	0
GO:0015629	actin cytoskeleton	CC	4	10	0.000684967	0.0343214	4	0
GO:0009055	electron transfer activity	MF	53	604	0.000802991	0.0397058	36	17
GO:0042973	glucan endo-1,3-beta-D-glucosidase activity	MF	4	8	0.000868215	0.0423734	4	0
GO:0010369	chromocenter	CC	3	4	0.000899436	0.0433344	3	0
GO:0043481	anthocyanin accumulation in tissues in response to UV light	BP	3	4	0.00100869	0.047983	3	0
GO:0006629	lipid metabolic process	BP	27	250	0.00114093	0.0532154	23	4
GO:0009744	response to sucrose	BP	6	22	0.00114701	0.0532154	5	1
GO:0030245	cellulose catabolic process	BP	4	9	0.00154974	0.0710232	4	0
GO:0048829	root cap development	BP	4	9	0.00160123	0.071758	4	0
GO:0051258	protein polymerization	BP	6	22	0.00160396	0.071758	6	0
GO:0080167	response to karrikin	BP	15	110	0.00164004	0.072509	12	3
GO:0006468	protein phosphorylation	BP	128	1647	0.00169627	0.0741229	103	25
GO:0005773	vacuole	CC	44	475	0.00193354	0.0827566	41	3
GO:0005506	iron ion binding	MF	47	526	0.00193789	0.0827566	31	16
GO:0009269	response to desiccation	BP	5	17	0.00209543	0.0884788	5	0
GO:0030246	carbohydrate binding	MF	20	170	0.00236088	0.0977525	13	7
GO:0008725	DNA-3-methyladenine glycosylase activity	MF	3	5	0.00236708	0.0977525	3	0
GO:0004623	phospholipase A2 activity	MF	3	6	0.00255306	0.104287	3	0
GO:0006334	nucleosome assembly	BP	8	53	0.00268043	0.108312	8	0
GO:0015200	methylammonium transmembrane transporter activity	MF	2	2	0.00309165	0.119993	2	0
GO:0072489	methylammonium transmembrane transport	BP	2	2	0.00309165	0.119993	2	0
GO:0051301	cell division	BP	10	61	0.00309961	0.119993	10	0
GO:0031977	thylakoid lumen	CC	7	34	0.00312914	0.119993	0	7
GO:0019898	extrinsic component of membrane	CC	5	21	0.00329598	0.125114	0	5
GO:0010196	nonphotochemical quenching	BP	3	6	0.00334199	0.125592	0	3
GO:0010623	programmed cell death involved in cell development	BP	2	2	0.0035161	0.130827	2	0
GO:0016042	lipid catabolic process	BP	7	35	0.00359324	0.130917	7	0
GO:0030410	nicotianamine synthase activity	MF	2	2	0.00362304	0.130917	2	0
GO:0030418	nicotianamine biosynthetic process	BP	2	2	0.00362304	0.130917	2	0
GO:0045157	electron transporter, transferring electrons within the noncyclic electron transport pathway of photosynthesis activity	MF	2	2	0.00374465	0.134023	0	2
GO:0004459	L-lactate dehydrogenase activity	MF	2	2	0.00381924	0.135403	2	0
GO:0010455	positive regulation of cell fate commitment	BP	2	2	0.00397012	0.139437	2	0
GO:0033907	beta-D-fucosidase activity	MF	2	2	0.00412341	0.142262	2	0
GO:0007164	establishment of tissue polarity	BP	2	2	0.00412628	0.142262	2	0
GO:0000079	regulation of cyclin-dependent protein serine/threonine kinase activity	BP	7	35	0.00425863	0.14549	7	0
GO:0080079	cellobiose glucosidase activity	MF	3	7	0.00461918	0.153836	3	0
GO:0080083	beta-gentiobiose beta-glucosidase activity	MF	3	7	0.00461918	0.153836	3	0
GO:0015018	galactosylgalactosylxylosylprotein 3-beta-glucuronosyltransferase activity	MF	4	13	0.00462573	0.153836	4	0
GO:0004497	monooxygenase activity	MF	32	336	0.0053934	0.177793	17	15
GO:0047800	cysteamine dioxygenase activity	MF	4	13	0.00571187	0.186654	4	0
GO:0009416	response to light stimulus	BP	9	57	0.00593854	0.192388	6	3
GO:0055028	cortical microtubule	CC	3	7	0.00636235	0.204357	3	0
GO:0019901	protein kinase binding	MF	7	38	0.00703086	0.223915	7	0
GO:0009651	response to salt stress	BP	26	268	0.00724418	0.227352	25	1
GO:0010026	trichome differentiation	BP	3	7	0.00725979	0.227352	2	1
GO:0042807	central vacuole	CC	2	3	0.00821663	0.253099	2	0
GO:0016705	oxidoreductase activity, acting on paired donors, with incorporation or reduction of molecular oxygen	MF	33	367	0.00847925	0.259065	18	15
GO:0042651	thylakoid membrane	CC	3	9	0.0088816	0.26917	0	3
GO:0015995	chlorophyll biosynthetic process	BP	4	14	0.00917164	0.275736	0	4
GO:0007062	sister chromatid cohesion	BP	3	8	0.00940933	0.280637	3	0
GO:0015671	oxygen transport	BP	2	4	0.0099321	0.288771	2	0
GO:0008643	carbohydrate transport	BP	7	45	0.00996989	0.288771	7	0
GO:0008289	lipid binding	MF	5	30	0.0100146	0.288771	5	0
GO:0005094	Rho GDP-dissociation inhibitor activity	MF	2	3	0.0100891	0.288771	2	0
GO:0008146	sulfotransferase activity	MF	6	37	0.0101379	0.288771	5	1
GO:0005664	nuclear origin of replication recognition complex	CC	2	3	0.0101431	0.288771	2	0
GO:0046854	phosphatidylinositol phosphorylation	BP	8	49	0.0104291	0.293631	8	0
GO:0000776	kinetochore	CC	2	3	0.0106976	0.293631	2	0
GO:0008810	cellulase activity	MF	3	8	0.0110332	0.293631	3	0
GO:0006344	maintenance of chromatin silencing	BP	2	3	0.0114946	0.293631	2	0
GO:0032197	transposition, RNA-mediated	BP	2	3	0.0114946	0.293631	2	0
GO:0044030	regulation of DNA methylation	BP	2	3	0.0114946	0.293631	2	0
GO:0051574	positive regulation of histone H3-K9 methylation	BP	2	3	0.0114946	0.293631	2	0
GO:0090241	negative regulation of histone H4 acetylation	BP	2	3	0.0114946	0.293631	2	0
GO:0016630	protochlorophyllide reductase activity	MF	2	3	0.0116648	0.293631	0	2
GO:0003896	DNA primase activity	MF	2	3	0.0118479	0.293631	2	0
GO:0006269	DNA replication, synthesis of RNA primer	BP	2	3	0.0118479	0.293631	2	0
GO:0046785	microtubule polymerization	BP	2	3	0.011849	0.293631	2	0
GO:0044445	cytosolic part	CC	2	3	0.011849	0.293631	2	0
GO:0080165	callose deposition in phloem sieve plate	BP	2	3	0.011849	0.293631	2	0
GO:0010442	guard cell morphogenesis	BP	2	3	0.011849	0.293631	1	1
GO:0052541	plant-type cell wall cellulose metabolic process	BP	2	3	0.011849	0.293631	1	1
GO:0009703	nitrate reductase (NADH) activity	MF	2	3	0.011849	0.293631	2	0
GO:0000914	phragmoplast assembly	BP	2	3	0.011849	0.293631	2	0
GO:0007076	mitotic chromosome condensation	BP	2	3	0.011849	0.293631	2	0
GO:0010043	response to zinc ion	BP	7	43	0.0118765	0.293631	7	0
GO:0046688	response to copper ion	BP	3	9	0.0137574	0.337911	2	1
GO:0009507	chloroplast	CC	66	914	0.0139146	0.339553	43	23
GO:0016717	oxidoreductase activity, acting on paired donors, with oxidation of a pair of donors resulting in the reduction of molecular oxygen to two molecules of water	MF	3	9	0.0141287	0.342554	3	0
GO:0009817	defense response to fungus, incompatible interaction	BP	8	60	0.0145385	0.350228	5	3
GO:0004650	polygalacturonase activity	MF	7	45	0.0149976	0.358988	7	0
GO:0006006	glucose metabolic process	BP	3	9	0.0153421	0.364751	1	2
GO:0009932	cell tip growth	BP	3	9	0.0154325	0.364751	2	1
GO:0008200	ion channel inhibitor activity	MF	1	1	0.0159642	0.37263	1	0
GO:0009405	pathogenesis	BP	1	1	0.0159642	0.37263	1	0
GO:0050794	regulation of cellular process	BP	5	28	0.0160882	0.373207	5	0
GO:0044262	cellular carbohydrate metabolic process	BP	4	17	0.0164866	0.380103	4	0
GO:0046982	protein heterodimerization activity	MF	8	70	0.0169467	0.388327	7	1
GO:0009414	response to water deprivation	BP	11	90	0.0171445	0.39048	10	1
GO:0006869	lipid transport	BP	5	33	0.0177314	0.401413	5	0
GO:0003779	actin binding	MF	8	60	0.0187232	0.421193	8	0
GO:0009930	longitudinal side of cell surface	CC	2	4	0.0189413	0.421193	2	0
GO:0010215	cellulose microfibril organization	BP	2	4	0.0189413	0.421193	2	0
GO:0009533	chloroplast stromal thylakoid	CC	2	4	0.0193548	0.427854	0	2
GO:0005544	calcium-dependent phospholipid binding	MF	3	11	0.0201541	0.441647	3	0
GO:0000325	plant-type vacuole	CC	5	27	0.0202138	0.441647	3	2
GO:0016758	transferase activity, transferring hexosyl groups	MF	24	297	0.0205453	0.446296	16	8
GO:0032259	methylation	BP	20	218	0.0206826	0.446696	16	4
GO:0007094	mitotic spindle assembly checkpoint	BP	2	4	0.0210619	0.449726	2	0
GO:0004324	ferredoxin-NADP+ reductase activity	MF	2	4	0.0211672	0.449726	0	2
GO:0016620	oxidoreductase activity, acting on the aldehyde or oxo group of donors, NAD or NADP as acceptor	MF	3	10	0.0211819	0.449726	1	2
GO:0000234	phosphoethanolamine N-methyltransferase activity	MF	2	4	0.0217029	0.455385	2	0
GO:0016756	glutathione gamma-glutamylcysteinyltransferase activity	MF	2	4	0.0217584	0.455385	2	0
GO:0006546	glycine catabolic process	BP	2	4	0.0218119	0.455385	2	0
GO:0009558	embryo sac cellularization	BP	2	4	0.0219387	0.455501	2	0
GO:0042389	omega-3 fatty acid desaturase activity	MF	2	4	0.0221589	0.457544	2	0
GO:0043546	molybdopterin cofactor binding	MF	2	4	0.0224265	0.458421	2	0
GO:0019252	starch biosynthetic process	BP	3	10	0.0224577	0.458421	2	1
GO:0006809	nitric oxide biosynthetic process	BP	2	4	0.0226748	0.458421	2	0
GO:0010385	double-stranded methylated DNA binding	MF	2	4	0.0226893	0.458421	2	0
GO:0009826	unidimensional cell growth	BP	6	38	0.0229165	0.460536	6	0
GO:0010073	meristem maintenance	BP	3	11	0.0234377	0.468505	3	0
GO:0006970	response to osmotic stress	BP	4	19	0.0243793	0.484748	4	0
GO:0000911	cytokinesis by cell plate formation	BP	3	12	0.0247801	0.485117	3	0
GO:0030170	pyridoxal phosphate binding	MF	13	114	0.024861	0.485117	12	1
GO:0003999	adenine phosphoribosyltransferase activity	MF	2	5	0.0249142	0.485117	1	1
GO:0006168	adenine salvage	BP	2	5	0.0249142	0.485117	1	1
GO:0003887	DNA-directed DNA polymerase activity	MF	5	27	0.0258124	0.500016	5	0
GO:0009734	auxin-activated signaling pathway	BP	8	67	0.0262407	0.505706	8	0
GO:0015204	urea transmembrane transporter activity	MF	2	5	0.0276394	0.527254	2	0
GO:0071918	urea transmembrane transport	BP	2	5	0.0276394	0.527254	2	0
GO:0009958	positive gravitropism	BP	3	11	0.0280343	0.531126	3	0
GO:0051749	indole acetic acid carboxyl methyltransferase activity	MF	2	5	0.0281251	0.531126	2	0
GO:0000139	Golgi membrane	CC	5	28	0.0285003	0.533	5	0
GO:0051726	regulation of cell cycle	BP	3	11	0.0286182	0.533	3	0
GO:0004737	pyruvate decarboxylase activity	MF	2	5	0.0286637	0.533	2	0
GO:0051087	chaperone binding	MF	3	12	0.0287916	0.533	3	0
GO:0006623	protein targeting to vacuole	BP	3	12	0.029327	0.54025	3	0
GO:0000228	nuclear chromosome	CC	2	5	0.0303682	0.556701	2	0
GO:0017089	glycolipid transporter activity	MF	2	6	0.0317411	0.573476	2	0
GO:0046836	glycolipid transport	BP	2	6	0.0317411	0.573476	2	0
GO:0051861	glycolipid binding	MF	2	6	0.0317411	0.573476	2	0
GO:0006631	fatty acid metabolic process	BP	3	12	0.032363	0.581915	3	0
GO:0008271	secondary active sulfate transmembrane transporter activity	MF	3	12	0.0327673	0.585004	3	0
GO:0051093	negative regulation of developmental process	BP	1	1	0.0328462	0.585004	1	0
GO:0042132	fructose 1,6-bisphosphate 1-phosphatase activity	MF	2	5	0.0340931	0.591326	0	2
GO:0005876	spindle microtubule	CC	2	5	0.0344199	0.591326	2	0
GO:0009617	response to bacterium	BP	5	33	0.0348166	0.591326	5	0
GO:0006656	phosphatidylcholine biosynthetic process	BP	2	5	0.0349167	0.591326	2	0
GO:0004560	alpha-L-fucosidase activity	MF	2	5	0.0351978	0.591326	2	0
GO:0047668	amygdalin beta-glucosidase activity	MF	2	6	0.0353009	0.591326	2	0
GO:0080081	4-methylumbelliferyl-beta-D-glucopyranoside beta-glucosidase activity	MF	2	6	0.0353009	0.591326	2	0
GO:0080082	esculin beta-glucosidase activity	MF	2	6	0.0353009	0.591326	2	0
GO:0006346	methylation-dependent chromatin silencing	BP	2	5	0.035591	0.591326	2	0
GO:0003886	DNA (cytosine-5-)-methyltransferase activity	MF	2	5	0.0357642	0.591326	2	0
GO:0090116	C-5 methylation of cytosine	BP	2	5	0.0357642	0.591326	2	0
GO:0019481	L-alanine catabolic process, by transamination	BP	2	5	0.0359435	0.591326	2	0
GO:0010067	procambium histogenesis	BP	2	5	0.0361242	0.591326	2	0
GO:0046030	inositol trisphosphate phosphatase activity	MF	2	5	0.0361242	0.591326	2	0
GO:0046855	inositol phosphate dephosphorylation	BP	2	5	0.0361242	0.591326	2	0
GO:0016324	apical plasma membrane	CC	2	5	0.0361364	0.591326	2	0
GO:0008878	glucose-1-phosphate adenylyltransferase activity	MF	2	5	0.0361962	0.591326	2	0
GO:0009827	plant-type cell wall modification	BP	2	5	0.0362108	0.591326	2	0
GO:0047334	diphosphate-fructose-6-phosphate 1-phosphotransferase activity	MF	2	5	0.0362149	0.591326	2	0
GO:0016491	oxidoreductase activity	MF	36	477	0.0363482	0.591326	26	10
GO:0048437	floral organ development	BP	2	6	0.0375975	0.609015	1	1
GO:0042631	cellular response to water deprivation	BP	3	14	0.0384907	0.620807	3	0
GO:0048513	animal organ development	BP	2	6	0.0388387	0.623744	2	0
GO:0080153	negative regulation of reductive pentose-phosphate cycle	BP	1	1	0.0392176	0.627147	0	1
GO:0008272	sulfate transport	BP	3	13	0.0404924	0.644789	3	0
GO:0016798	hydrolase activity, acting on glycosyl bonds	MF	3	16	0.0416922	0.661095	3	0
GO:0009825	multidimensional cell growth	BP	3	14	0.0438478	0.692354	3	0
GO:0055070	copper ion homeostasis	BP	1	1	0.0442452	0.694034	0	1
GO:0015700	arsenite transport	BP	2	6	0.0444713	0.694034	2	0
GO:0042128	nitrate assimilation	BP	2	6	0.0445083	0.694034	2	0
GO:0010206	photosystem II repair	BP	2	6	0.0448821	0.696663	0	2
GO:0016682	oxidoreductase activity, acting on diphenols and related substances as donors, oxygen as acceptor	MF	2	6	0.0450476	0.696663	2	0
GO:0016123	xanthophyll biosynthetic process	BP	2	6	0.0471943	0.72687	1	1
GO:0005737	cytoplasm	CC	30	366	0.0484218	0.738346	26	4
GO:0048510	regulation of timing of transition from vegetative to reproductive phase	BP	2	7	0.0487911	0.738346	2	0

## Sheet: Table 5
Table 5. Gene Ontology (GO) analysis of DEGs between oswrky53-osarf18-osrr22 and osarf18 roots under salt stress.
category	term	ontology	numDEInCat	numInCat	over_represented_pvalue	over_represented_FDR	GeneNumber(Up)	GeneNumber(Down)
GO:0055114	oxidation-reduction process	BP	263	1592	5.71931e-35	1.07466e-31	144	119
GO:0020037	heme binding	MF	123	581	1.53857e-26	1.92731e-23	69	54
GO:0048046	apoplast	CC	74	303	1.18621e-19	8.99374e-17	38	36
GO:0004601	peroxidase activity	MF	54	182	1.19661e-19	8.99374e-17	21	33
GO:0006979	response to oxidative stress	BP	60	224	4.57233e-19	2.8638e-16	25	35
GO:0006468	protein phosphorylation	BP	220	1647	1.87581e-15	1.00704e-12	149	71
GO:0005618	cell wall	CC	74	390	7.61917e-15	3.5791e-12	43	31
GO:0005975	carbohydrate metabolic process	BP	81	431	2.94449e-14	1.22949e-11	37	44
GO:0009505	plant-type cell wall	CC	49	191	4.55981e-14	1.71358e-11	12	37
GO:0005524	ATP binding	MF	336	2885	1.05982e-13	3.62072e-11	196	140
GO:0004553	hydrolase activity, hydrolyzing O-glycosyl compounds	MF	59	278	2.66607e-13	8.02813e-11	28	31
GO:0005506	iron ion binding	MF	89	526	2.77716e-13	8.02813e-11	59	30
GO:0004674	protein serine/threonine kinase activity	MF	181	1348	3.88338e-13	1.04241e-10	132	49
GO:0009055	electron transfer activity	MF	94	604	1.48185e-12	3.71252e-10	63	31
GO:0005576	extracellular region	CC	42	190	9.11094e-12	2.13993e-09	13	29
GO:0016020	membrane	CC	251	2287	1.05105e-11	2.32343e-09	127	124
GO:0005507	copper ion binding	MF	50	253	3.67956e-11	7.68209e-09	25	25
GO:0005874	microtubule	CC	27	82	5.24757e-11	1.03791e-08	0	27
GO:0005875	microtubule associated complex	CC	22	68	3.98852e-09	7.49442e-07	0	22
GO:0007018	microtubule-based movement	BP	21	61	5.35557e-09	9.58392e-07	0	21
GO:0016705	oxidoreductase activity, acting on paired donors, with incorporation or reduction of molecular oxygen	MF	59	367	1.93516e-08	3.3056e-06	40	19
GO:0004497	monooxygenase activity	MF	56	336	2.28584e-08	3.73486e-06	38	18
GO:0046872	metal ion binding	MF	101	819	2.71938e-08	4.2581e-06	47	54
GO:0046274	lignin catabolic process	BP	11	21	2.09545e-07	3.02873e-05	6	5
GO:0052716	hydroquinone:oxygen oxidoreductase activity	MF	11	21	2.09545e-07	3.02873e-05	6	5
GO:0009704	de-etiolation	BP	11	27	4.25142e-07	5.91735e-05	9	2
GO:0060416	response to growth hormone	BP	10	25	1.4547e-06	0.000195241	9	1
GO:0003777	microtubule motor activity	MF	16	52	1.79584e-06	0.000232717	0	16
GO:0031012	extracellular matrix	CC	9	20	1.88721e-06	0.000236405	9	0
GO:0046658	anchored component of plasma membrane	CC	12	33	4.84578e-06	0.000556783	3	9
GO:0019953	sexual reproduction	BP	9	20	4.94938e-06	0.000556783	0	9
GO:0016706	oxidoreductase activity, acting on paired donors, with incorporation or reduction of molecular oxygen, 2-oxoglutarate as one donor, and incorporation of one atom each of oxygen into both donors	MF	24	119	5.01658e-06	0.000556783	16	8
GO:0030247	polysaccharide binding	MF	29	158	5.03742e-06	0.000556783	28	1
GO:0048527	lateral root development	BP	12	40	9.20597e-06	0.000988459	11	1
GO:0009617	response to bacterium	BP	11	33	1.30681e-05	0.00135363	9	2
GO:0019288	isopentenyl diphosphate biosynthetic process, methylerythritol 4-phosphate pathway	BP	5	6	1.33274e-05	0.00135363	5	0
GO:0016717	oxidoreductase activity, acting on paired donors, with oxidation of a pair of donors resulting in the reduction of molecular oxygen to two molecules of water	MF	6	9	1.66803e-05	0.00164959	3	3
GO:0009800	cinnamic acid biosynthetic process	BP	6	9	2.35723e-05	0.00221461	4	2
GO:0045548	phenylalanine ammonia-lyase activity	MF	6	9	2.35723e-05	0.00221461	4	2
GO:0045735	nutrient reservoir activity	MF	14	60	2.96585e-05	0.00271845	13	1
GO:0030244	cellulose biosynthetic process	BP	12	39	3.89798e-05	0.00348776	5	7
GO:0016021	integral component of membrane	CC	141	1331	4.74495e-05	0.00408939	70	71
GO:0043086	negative regulation of catalytic activity	BP	22	125	4.788e-05	0.00408939	15	7
GO:0006629	lipid metabolic process	BP	37	250	5.00155e-05	0.00417685	20	17
GO:0006559	L-phenylalanine catabolic process	BP	6	10	5.47141e-05	0.00446991	4	2
GO:0010333	terpene synthase activity	MF	13	53	5.7951e-05	0.00463361	10	3
GO:0080167	response to karrikin	BP	21	110	6.65093e-05	0.00520712	16	5
GO:0030145	manganese ion binding	MF	12	49	7.65981e-05	0.0058746	11	1
GO:0016760	cellulose synthase (UDP-forming) activity	MF	10	30	7.89942e-05	0.0059372	4	6
GO:0005773	vacuole	CC	60	475	9.48545e-05	0.00698948	32	28
GO:0009664	plant-type cell wall organization	BP	10	39	0.000130538	0.00943386	0	10
GO:0005886	plasma membrane	CC	164	1616	0.000145793	0.0103375	82	82
GO:0004565	beta-galactosidase activity	MF	7	16	0.000170242	0.0117549	0	7
GO:0006633	fatty acid biosynthetic process	BP	17	86	0.000172038	0.0117549	4	13
GO:0006952	defense response	BP	72	616	0.000188268	0.0126341	46	26
GO:0016747	transferase activity, transferring acyl groups other than amino-acyl groups	MF	29	193	0.00019298	0.0127232	17	12
GO:0009817	defense response to fungus, incompatible interaction	BP	13	60	0.00021998	0.0142532	10	3
GO:0016114	terpenoid biosynthetic process	BP	4	5	0.000232322	0.0147977	4	0
GO:0046688	response to copper ion	BP	5	9	0.000283998	0.0177877	3	2
GO:0005783	endoplasmic reticulum	CC	37	263	0.000289756	0.0178508	18	19
GO:0016720	delta12-fatty acid dehydrogenase activity	MF	3	3	0.000353344	0.0210771	3	0
GO:0046429	4-hydroxy-3-methylbut-2-en-1-yl diphosphate synthase activity	MF	3	3	0.000358949	0.0210771	3	0
GO:0004672	protein kinase activity	MF	43	334	0.000399083	0.0230731	19	24
GO:0007017	microtubule-based process	BP	8	27	0.000484295	0.0275755	0	8
GO:0009607	response to biotic stimulus	BP	8	29	0.000532049	0.0296467	6	2
GO:0030001	metal ion transport	BP	11	54	0.000541807	0.0296467	5	6
GO:0016126	sterol biosynthetic process	BP	5	10	0.000544338	0.0296467	0	5
GO:0030246	carbohydrate binding	MF	26	170	0.00055343	0.0297113	19	7
GO:0009409	response to cold	BP	27	183	0.000563724	0.0298377	15	12
GO:0007076	mitotic chromosome condensation	BP	3	3	0.000593128	0.030927	0	3
GO:0000910	cytokinesis	BP	8	26	0.000600764	0.030927	0	8
GO:0009360	DNA polymerase III complex	CC	4	6	0.000650295	0.0327045	0	4
GO:0016757	transferase activity, transferring glycosyl groups	MF	18	98	0.000652697	0.0327045	4	14
GO:0080079	cellobiose glucosidase activity	MF	4	7	0.000714577	0.0345978	0	4
GO:0080083	beta-gentiobiose beta-glucosidase activity	MF	4	7	0.000714577	0.0345978	0	4
GO:0006073	cellular glucan metabolic process	BP	8	28	0.000718102	0.0345978	1	7
GO:0016762	xyloglucan:xyloglucosyl transferase activity	MF	8	29	0.000931132	0.0442936	1	7
GO:0043531	ADP binding	MF	70	606	0.00103761	0.0487418	47	23
GO:0009651	response to salt stress	BP	35	268	0.00114461	0.0531042	26	9
GO:0019825	oxygen binding	MF	4	8	0.00126127	0.0578029	3	1
GO:0005978	glycogen biosynthetic process	BP	4	7	0.00132834	0.0601436	0	4
GO:0000287	magnesium ion binding	MF	24	163	0.00150476	0.0673199	17	7
GO:0045485	omega-6 fatty acid desaturase activity	MF	3	4	0.00153084	0.0676812	3	0
GO:0010241	ent-kaurene oxidation to kaurenoic acid	BP	3	4	0.00216834	0.0947515	2	1
GO:0005856	cytoskeleton	CC	7	25	0.0023056	0.0995914	1	6
GO:0042973	glucan endo-1,3-beta-D-glucosidase activity	MF	4	8	0.00238134	0.101694	1	3
GO:0009707	chloroplast outer membrane	CC	6	19	0.00262311	0.11076	3	3
GO:0005200	structural constituent of cytoskeleton	MF	5	13	0.00291901	0.121885	0	5
GO:0005819	spindle	CC	6	19	0.00314455	0.129859	0	6
GO:0009555	pollen development	BP	12	62	0.00357434	0.146004	3	9
GO:0042802	identical protein binding	MF	14	81	0.00378377	0.152897	8	6
GO:0004675	transmembrane receptor protein serine/threonine kinase activity	MF	7	26	0.00400287	0.158345	6	1
GO:0007178	transmembrane receptor protein serine/threonine kinase signaling pathway	BP	7	26	0.00400287	0.158345	6	1
GO:0005509	calcium ion binding	MF	41	372	0.00476476	0.186521	30	11
GO:0008878	glucose-1-phosphate adenylyltransferase activity	MF	3	5	0.00520503	0.193384	0	3
GO:0047334	diphosphate-fructose-6-phosphate 1-phosphotransferase activity	MF	3	5	0.0052092	0.193384	1	2
GO:0015200	methylammonium transmembrane transporter activity	MF	2	2	0.00527342	0.193384	0	2
GO:0072489	methylammonium transmembrane transport	BP	2	2	0.00527342	0.193384	0	2
GO:0047668	amygdalin beta-glucosidase activity	MF	3	6	0.00535177	0.193384	0	3
GO:0080081	4-methylumbelliferyl-beta-D-glucopyranoside beta-glucosidase activity	MF	3	6	0.00535177	0.193384	0	3
GO:0080082	esculin beta-glucosidase activity	MF	3	6	0.00535177	0.193384	0	3
GO:0008017	microtubule binding	MF	7	28	0.00590908	0.210497	0	7
GO:0050660	flavin adenine dinucleotide binding	MF	22	157	0.00601458	0.210497	15	7
GO:0030410	nicotianamine synthase activity	MF	2	2	0.00619193	0.210497	2	0
GO:0030418	nicotianamine biosynthetic process	BP	2	2	0.00619193	0.210497	2	0
GO:0000162	tryptophan biosynthetic process	BP	4	10	0.00622062	0.210497	4	0
GO:0051504	diterpene phytoalexin precursor biosynthetic process pathway	BP	2	2	0.0062611	0.210497	2	0
GO:0008519	ammonium transmembrane transporter activity	MF	4	11	0.00627346	0.210497	4	0
GO:0072488	ammonium transmembrane transport	BP	4	11	0.00627346	0.210497	4	0
GO:0008762	UDP-N-acetylmuramate dehydrogenase activity	MF	8	37	0.00666464	0.21358	6	2
GO:0008061	chitin binding	MF	5	19	0.00683962	0.21358	4	1
GO:0019252	starch biosynthetic process	BP	4	10	0.00686033	0.21358	0	4
GO:0016102	diterpenoid biosynthetic process	BP	2	2	0.0069211	0.21358	2	0
GO:0036201	ent-isokaurene C2-hydroxylase activity	MF	2	2	0.0069211	0.21358	2	0
GO:0051501	diterpene phytoalexin metabolic process	BP	3	6	0.00698578	0.21358	3	0
GO:0018858	benzoate-CoA ligase activity	MF	2	2	0.00704561	0.21358	2	0
GO:0033907	beta-D-fucosidase activity	MF	2	2	0.00705615	0.21358	0	2
GO:0004420	hydroxymethylglutaryl-CoA reductase (NADPH) activity	MF	2	2	0.0070611	0.21358	0	2
GO:0015936	coenzyme A metabolic process	BP	2	2	0.0070611	0.21358	0	2
GO:0016104	triterpenoid biosynthetic process	BP	2	2	0.0070611	0.21358	0	2
GO:0042282	hydroxymethylglutaryl-CoA reductase activity	MF	2	2	0.0070611	0.21358	0	2
GO:0008152	metabolic process	BP	83	874	0.00710417	0.21358	41	42
GO:0006909	phagocytosis	BP	3	6	0.00810347	0.241689	0	3
GO:0004568	chitinase activity	MF	6	28	0.00840632	0.248748	5	1
GO:0055085	transmembrane transport	BP	50	446	0.00854017	0.250734	23	27
GO:0016831	carboxy-lyase activity	MF	4	11	0.00865027	0.251998	2	2
GO:0003872	6-phosphofructokinase activity	MF	5	17	0.00896258	0.25711	3	2
GO:0005945	6-phosphofructokinase complex	CC	5	17	0.00896258	0.25711	3	2
GO:0016036	cellular response to phosphate starvation	BP	10	55	0.00953626	0.271494	7	3
GO:0008569	ATP-dependent microtubule motor activity, minus-end-directed	MF	3	6	0.00969203	0.273854	0	3
GO:0016998	cell wall macromolecule catabolic process	BP	8	46	0.00992259	0.278277	6	2
GO:0009620	response to fungus	BP	5	17	0.0100323	0.27927	4	1
GO:0018685	alkane 1-monooxygenase activity	MF	3	7	0.0112002	0.309487	3	0
GO:0004567	beta-mannosidase activity	MF	2	3	0.0115847	0.314741	0	2
GO:0006631	fatty acid metabolic process	BP	4	12	0.0115966	0.314741	2	2
GO:0045300	acyl-[acyl-carrier-protein] desaturase activity	MF	3	7	0.0116416	0.314741	2	1
GO:0045926	negative regulation of growth	BP	2	3	0.0120134	0.322475	1	1
GO:0004805	trehalose-phosphatase activity	MF	3	7	0.013769	0.366286	3	0
GO:0042807	central vacuole	CC	2	3	0.0138405	0.366286	0	2
GO:0019761	glucosinolate biosynthetic process	BP	3	7	0.0145142	0.380015	3	0
GO:0047800	cysteamine dioxygenase activity	MF	4	13	0.0145615	0.380015	4	0
GO:0010026	trichome differentiation	BP	3	7	0.0152855	0.396157	2	1
GO:0006873	cellular ion homeostasis	BP	3	7	0.0160264	0.412516	1	2
GO:0004857	enzyme inhibitor activity	MF	9	64	0.0162334	0.415001	7	2
GO:0048544	recognition of pollen	BP	18	135	0.0165577	0.42043	15	3
GO:0015706	nitrate transport	BP	3	8	0.0178078	0.446144	3	0
GO:0000776	kinetochore	CC	2	3	0.0180496	0.449207	0	2
GO:0042425	choline biosynthetic process	BP	2	3	0.0188296	0.465106	0	2
GO:0010305	leaf vascular tissue pattern formation	BP	4	13	0.0189359	0.465106	0	4
GO:0005987	sucrose catabolic process	BP	2	3	0.0191563	0.466763	2	0
GO:0007062	sister chromatid cohesion	BP	3	8	0.0195738	0.466763	0	3
GO:0008200	ion channel inhibitor activity	MF	1	1	0.0197584	0.466763	0	1
GO:0009405	pathogenesis	BP	1	1	0.0197584	0.466763	0	1
GO:0010442	guard cell morphogenesis	BP	2	3	0.019997	0.466763	1	1
GO:0052541	plant-type cell wall cellulose metabolic process	BP	2	3	0.019997	0.466763	1	1
GO:0000914	phragmoplast assembly	BP	2	3	0.019997	0.466763	0	2
GO:0051225	spindle assembly	BP	2	3	0.019997	0.466763	1	1
GO:0008889	glycerophosphodiester phosphodiesterase activity	MF	4	14	0.021227	0.489665	3	1
GO:0003887	DNA-directed DNA polymerase activity	MF	6	27	0.0212388	0.489665	0	6
GO:0030170	pyridoxal phosphate binding	MF	16	114	0.0221514	0.507591	11	5
GO:0009524	phragmoplast	CC	7	36	0.023502	0.535275	1	6
GO:0009247	glycolipid biosynthetic process	BP	3	8	0.023718	0.536941	1	2
GO:0009538	photosystem I reaction center	CC	2	4	0.0240025	0.538832	0	2
GO:0030599	pectinesterase activity	MF	11	86	0.0240883	0.538832	8	3
GO:0005983	starch catabolic process	BP	4	15	0.0260967	0.580303	2	2
GO:0009611	response to wounding	BP	15	120	0.0262718	0.580761	8	7
GO:0051258	protein polymerization	BP	5	22	0.0265329	0.583104	0	5
GO:0042546	cell wall biogenesis	BP	5	22	0.0271576	0.593361	1	4
GO:0006071	glycerol metabolic process	BP	4	15	0.0274644	0.596597	3	1
GO:0009678	hydrogen-translocating pyrophosphatase activity	MF	3	9	0.0276555	0.597296	2	1
GO:0006002	fructose 6-phosphate metabolic process	BP	4	15	0.0314596	0.666376	2	2
GO:0009930	longitudinal side of cell surface	CC	2	4	0.0315546	0.666376	2	0
GO:0010215	cellulose microfibril organization	BP	2	4	0.0315546	0.666376	2	0
GO:0009932	cell tip growth	BP	3	9	0.0315633	0.666376	1	2
GO:0009926	auxin polar transport	BP	3	9	0.0320586	0.673052	1	2
GO:0031418	L-ascorbic acid binding	MF	4	17	0.0328465	0.6796	3	1
GO:0004427	inorganic diphosphatase activity	MF	4	17	0.0328904	0.6796	3	1
GO:0008146	sulfotransferase activity	MF	6	37	0.0330026	0.6796	1	5
GO:0048829	root cap development	BP	3	9	0.0331925	0.6796	1	2
GO:0043565	sequence-specific DNA binding	MF	26	245	0.0333977	0.6796	15	11
GO:0006950	response to stress	BP	15	120	0.0334555	0.6796	10	5
GO:0046592	polyamine oxidase activity	MF	2	4	0.0336686	0.680251	2	0
GO:0007094	mitotic spindle assembly checkpoint	BP	2	4	0.0350759	0.700908	0	2
GO:0010369	chromocenter	CC	2	4	0.0350796	0.700908	0	2
GO:0004324	ferredoxin-NADP+ reductase activity	MF	2	4	0.0352506	0.700908	1	1
GO:0045454	cell redox homeostasis	BP	13	103	0.0357922	0.707931	8	5
GO:0000234	phosphoethanolamine N-methyltransferase activity	MF	2	4	0.0361382	0.711033	0	2
GO:0009558	embryo sac cellularization	BP	2	4	0.0365288	0.712183	0	2
GO:0042389	omega-3 fatty acid desaturase activity	MF	2	4	0.0368933	0.712183	0	2
GO:0006032	chitin catabolic process	BP	5	28	0.0369682	0.712183	4	1
GO:0005093	Rab GDP-dissociation inhibitor activity	MF	2	4	0.0373445	0.712183	1	1
GO:0046512	sphingosine biosynthetic process	BP	2	4	0.0374091	0.712183	2	0
GO:0003885	D-arabinono-1,4-lactone oxidase activity	MF	3	10	0.0375116	0.712183	1	2
GO:0008728	GTP diphosphokinase activity	MF	2	4	0.0375232	0.712183	1	1
GO:0009674	potassium:sodium symporter activity	MF	2	4	0.037771	0.713284	2	0
GO:0005544	calcium-dependent phospholipid binding	MF	3	11	0.040451	0.756292	1	2
GO:0008299	isoprenoid biosynthetic process	BP	4	18	0.0418747	0.779035	1	3
GO:0015112	nitrate transmembrane transporter activity	MF	2	5	0.0424364	0.785597	2	0
GO:0010228	vegetative to reproductive phase transition of meristem	BP	6	33	0.0439119	0.808926	4	2
GO:0009626	plant-type hypersensitive response	BP	4	17	0.0445709	0.814176	1	3
GO:0016887	ATPase activity	MF	13	95	0.0446302	0.814176	12	1
GO:0045330	aspartyl esterase activity	MF	7	45	0.0454131	0.818429	5	2
GO:0015204	urea transmembrane transporter activity	MF	2	5	0.0455167	0.818429	1	1
GO:0071918	urea transmembrane transport	BP	2	5	0.0455167	0.818429	1	1
GO:0051301	cell division	BP	9	61	0.0460251	0.823629	3	6
GO:0004737	pyruvate decarboxylase activity	MF	2	5	0.0471925	0.840519	2	0
GO:0010277	chlorophyllide a oxygenase [overall] activity	MF	3	11	0.0477038	0.845617	0	3
GO:0048856	anatomical structure development	BP	2	5	0.0480377	0.847539	1	1
GO:0000911	cytokinesis by cell plate formation	BP	3	12	0.0491752	0.863553	1	2
GO:0010181	FMN binding	MF	6	35	0.0499039	0.867125	3	3

## Sheet: Table 6
Table 6. Gene Ontology (GO) analysis of DEGs between oswrky53-osarf18-osrr22 and oswrky53 roots under salt stress.
category	term	ontology	numDEInCat	numInCat	over_represented_pvalue	over_represented_FDR	GeneNumber(Up)	GeneNumber(Down)
GO:0020037	heme binding	MF	41	581	1.18371e-11	2.09492e-08	30	11
GO:0055114	oxidation-reduction process	BP	76	1592	1.67237e-11	2.09492e-08	49	27
GO:0004601	peroxidase activity	MF	19	182	8.22136e-09	7.72396e-06	18	1
GO:0006979	response to oxidative stress	BP	19	224	2.45697e-07	0.000184666	17	2
GO:0005576	extracellular region	CC	16	190	1.50559e-06	0.000943004	15	1
GO:0080167	response to karrikin	BP	12	110	3.50854e-06	0.00188358	8	4
GO:0047800	cysteamine dioxygenase activity	MF	5	13	4.77448e-06	0.00224281	5	0
GO:0005506	iron ion binding	MF	26	526	5.63502e-05	0.0235293	16	10
GO:0004197	cysteine-type endopeptidase activity	MF	5	21	7.10765e-05	0.0267105	2	3
GO:0080170	hydrogen peroxide transmembrane transport	BP	3	5	7.89222e-05	0.0268455	3	0
GO:0004737	pyruvate decarboxylase activity	MF	3	5	8.57228e-05	0.0268455	3	0
GO:0004553	hydrolase activity, hydrolyzing O-glycosyl compounds	MF	17	278	9.2878e-05	0.0268489	13	4
GO:0009624	response to nematode	BP	9	89	0.000140748	0.0377808	8	1
GO:0005975	carbohydrate metabolic process	BP	22	431	0.000151441	0.0379411	17	5
GO:0016036	cellular response to phosphate starvation	BP	7	55	0.000164658	0.0386741	6	1
GO:0016682	oxidoreductase activity, acting on diphenols and related substances as donors, oxygen as acceptor	MF	3	6	0.000182546	0.0403533	3	0
GO:0030170	pyridoxal phosphate binding	MF	10	114	0.000207389	0.0432982	5	5
GO:0016705	oxidoreductase activity, acting on paired donors, with incorporation or reduction of molecular oxygen	MF	19	367	0.000321025	0.0626665	9	10
GO:0004497	monooxygenase activity	MF	18	336	0.000344344	0.0626665	8	10
GO:0005978	glycogen biosynthetic process	BP	3	7	0.000350185	0.0626665	3	0
GO:0006833	water transport	BP	3	8	0.000449725	0.0718218	3	0
GO:0030410	nicotianamine synthase activity	MF	2	2	0.000458681	0.0718218	2	0
GO:0030418	nicotianamine biosynthetic process	BP	2	2	0.000458681	0.0718218	2	0
GO:0005887	integral component of plasma membrane	CC	4	22	0.000839162	0.126143	4	0
GO:0045735	nutrient reservoir activity	MF	6	60	0.00110325	0.154707	3	3
GO:0048527	lateral root development	BP	5	40	0.00111152	0.154707	3	2
GO:0019252	starch biosynthetic process	BP	3	10	0.00117174	0.156476	3	0
GO:0060416	response to growth hormone	BP	4	25	0.0012075	0.156476	2	2
GO:0010073	meristem maintenance	BP	3	11	0.00136701	0.169737	3	0
GO:0009704	de-etiolation	BP	4	27	0.00169212	0.198719	2	2
GO:0015671	oxygen transport	BP	2	4	0.00181767	0.206994	2	0
GO:0004568	chitinase activity	MF	4	28	0.00196457	0.217143	3	1
GO:0008643	carbohydrate transport	BP	5	45	0.0020597	0.221153	5	0
GO:0008152	metabolic process	BP	31	874	0.00245892	0.251325	18	13
GO:0051119	sugar transmembrane transporter activity	MF	3	15	0.00247446	0.251325	3	0
GO:0005618	cell wall	CC	17	390	0.00288303	0.285117	15	2
GO:0016706	oxidoreductase activity, acting on paired donors, with incorporation or reduction of molecular oxygen, 2-oxoglutarate as one donor, and incorporation of one atom each of oxygen into both donors	MF	8	119	0.00330369	0.31834	6	2
GO:0003993	acid phosphatase activity	MF	5	50	0.00359381	0.337638	4	1
GO:0030976	thiamine pyrophosphate binding	MF	3	17	0.00424255	0.379478	3	0
GO:0016788	hydrolase activity, acting on ester bonds	MF	11	212	0.00424797	0.379478	8	3
GO:0005783	endoplasmic reticulum	CC	13	263	0.00434209	0.379478	6	7
GO:0071215	cellular response to abscisic acid stimulus	BP	2	5	0.00459918	0.391111	1	1
GO:0008878	glucose-1-phosphate adenylyltransferase activity	MF	2	5	0.00473849	0.391111	2	0
GO:0031418	L-ascorbic acid binding	MF	3	17	0.00484281	0.391111	3	0
GO:0009269	response to desiccation	BP	3	17	0.00489149	0.391111	3	0
GO:0009664	plant-type cell wall organization	BP	4	39	0.00642993	0.477041	4	0
GO:0031012	extracellular matrix	CC	3	20	0.00643427	0.477041	2	1
GO:0006629	lipid metabolic process	BP	12	250	0.00644921	0.477041	9	3
GO:0005215	transporter activity	MF	10	186	0.00647395	0.477041	9	1
GO:0006970	response to osmotic stress	BP	3	19	0.00733249	0.528168	3	0
GO:0009055	electron transfer activity	MF	22	604	0.00744888	0.528168	11	11
GO:0019953	sexual reproduction	BP	3	20	0.00766122	0.533164	3	0
GO:0055085	transmembrane transport	BP	18	446	0.00877018	0.599242	14	4
GO:0019825	oxygen binding	MF	2	8	0.0102231	0.686041	2	0
GO:0016021	integral component of membrane	CC	41	1331	0.0106929	0.704982	30	11
GO:0046686	response to cadmium ion	BP	14	333	0.0117574	0.761798	9	5
GO:0048046	apoplast	CC	13	303	0.0126278	0.804327	10	3
GO:0008171	O-methyltransferase activity	MF	4	47	0.013656	0.855323	2	2
GO:0006826	iron ion transport	BP	2	9	0.0142164	0.875825	2	0
GO:0019752	carboxylic acid metabolic process	BP	2	9	0.0147928	0.896637	0	2
GO:0016758	transferase activity, transferring hexosyl groups	MF	12	297	0.0152434	0.909284	7	5
GO:0009800	cinnamic acid biosynthetic process	BP	2	9	0.016082	0.929788	0	2
GO:0045548	phenylalanine ammonia-lyase activity	MF	2	9	0.016082	0.929788	0	2
GO:0006032	chitin catabolic process	BP	3	28	0.0171597	0.97332	2	1
GO:0055069	zinc ion homeostasis	BP	2	10	0.0179711	0.97332	2	0
GO:0006559	L-phenylalanine catabolic process	BP	2	10	0.0198086	0.97332	0	2
GO:0009011	starch synthase activity	MF	2	10	0.0198095	0.97332	2	0
GO:0045486	naringenin 3-dioxygenase activity	MF	1	1	0.0212842	0.97332	0	1
GO:0004149	dihydrolipoyllysine-residue succinyltransferase activity	MF	1	1	0.0215683	0.97332	0	1
GO:0045252	oxoglutarate dehydrogenase complex	CC	1	1	0.0215683	0.97332	0	1
GO:0004793	threonine aldolase activity	MF	1	1	0.0216535	0.97332	0	1
GO:0006567	threonine catabolic process	BP	1	1	0.0216535	0.97332	0	1
GO:0055075	potassium ion homeostasis	BP	1	1	0.022163	0.97332	1	0
GO:0047251	thiohydroximate beta-D-glucosyltransferase activity	MF	1	1	0.0221678	0.97332	0	1
GO:0016847	1-aminocyclopropane-1-carboxylate synthase activity	MF	1	1	0.0222077	0.97332	1	0
GO:0004637	phosphoribosylamine-glycine ligase activity	MF	1	1	0.0222154	0.97332	1	0
GO:0033855	nicotianamine aminotransferase activity	MF	1	1	0.0222486	0.97332	1	0
GO:0034051	negative regulation of plant-type hypersensitive response	BP	1	1	0.0222619	0.97332	1	0
GO:0045595	regulation of cell differentiation	BP	1	1	0.0222619	0.97332	1	0
GO:0018826	methionine gamma-lyase activity	MF	1	1	0.0222652	0.97332	0	1
GO:0033567	DNA replication, Okazaki fragment processing	BP	1	1	0.022274	0.97332	1	0
GO:0034279	syn-pimara-7,15-diene synthase activity	MF	1	1	0.022274	0.97332	1	0
GO:0043142	single-stranded DNA-dependent ATPase activity	MF	1	1	0.022274	0.97332	1	0
GO:0048255	mRNA stabilization	BP	1	1	0.022274	0.97332	0	1
GO:0000287	magnesium ion binding	MF	8	163	0.0227899	0.984417	6	2
GO:0032957	inositol trisphosphate metabolic process	BP	2	11	0.0236475	1	1	1
GO:0042538	hyperosmotic salinity response	BP	3	31	0.0246475	1	1	2
GO:0006614	SRP-dependent cotranslational protein targeting to membrane	BP	2	12	0.0259803	1	1	1
GO:0046872	metal ion binding	MF	25	819	0.0295058	1	21	4
GO:0042802	identical protein binding	MF	5	81	0.0295883	1	3	2
GO:0042631	cellular response to water deprivation	BP	2	14	0.0320411	1	0	2
GO:0009416	response to light stimulus	BP	4	57	0.0326973	1	1	3
GO:0016866	intramolecular transferase activity	MF	2	14	0.0335849	1	1	1
GO:0008146	sulfotransferase activity	MF	3	37	0.0349054	1	3	0
GO:0005507	copper ion binding	MF	10	253	0.0352564	1	8	2
GO:0004451	isocitrate lyase activity	MF	1	2	0.0389617	1	0	1
GO:0043086	negative regulation of catalytic activity	BP	6	125	0.039821	1	3	3
GO:0009452	7-methylguanosine RNA capping	BP	1	2	0.040407	1	1	0
GO:0009715	chalcone biosynthetic process	BP	1	2	0.0421344	1	1	0
GO:0016210	naringenin-chalcone synthase activity	MF	1	2	0.0421344	1	1	0
GO:0009815	1-aminocyclopropane-1-carboxylate oxidase activity	MF	1	2	0.0424875	1	1	0
GO:0009835	fruit ripening	BP	1	2	0.0424875	1	1	0
GO:0003844	1,4-alpha-glucan branching enzyme activity	MF	1	2	0.0425393	1	1	0
GO:0016891	endoribonuclease activity, producing 5'-phosphomonoesters	MF	1	2	0.0426248	1	1	0
GO:0046983	protein dimerization activity	MF	17	523	0.0426508	1	12	5
GO:0004459	L-lactate dehydrogenase activity	MF	1	2	0.0430531	1	1	0
GO:0008425	2-polyprenyl-6-methoxy-1,4-benzoquinone methyltransferase activity	MF	1	2	0.0432699	1	1	0
GO:0045544	gibberellin 20-oxidase activity	MF	1	2	0.0433901	1	1	0
GO:0048575	short-day photoperiodism, flowering	BP	1	2	0.0433901	1	1	0
GO:0005785	signal recognition particle receptor complex	CC	1	2	0.0435219	1	1	0
GO:0015193	L-proline transmembrane transporter activity	MF	1	2	0.0436894	1	1	0
GO:0035524	proline transmembrane transport	BP	1	2	0.0436894	1	1	0
GO:0052638	indole-3-butyrate beta-glucosyltransferase activity	MF	1	2	0.0437747	1	0	1
GO:0070301	cellular response to hydrogen peroxide	BP	1	2	0.0437747	1	0	1
GO:0071475	cellular hyperosmotic salinity response	BP	1	2	0.0437747	1	0	1
GO:0040009	regulation of growth rate	BP	1	2	0.0438271	1	0	1
GO:0046622	positive regulation of organ growth	BP	1	2	0.0438271	1	0	1
GO:0006164	purine nucleotide biosynthetic process	BP	1	2	0.0439916	1	1	0
GO:0004022	alcohol dehydrogenase (NAD) activity	MF	1	2	0.0440208	1	1	0
GO:0030931	heterotetrameric ADPG pyrophosphorylase complex	CC	1	2	0.0440339	1	1	0
GO:0046510	UDP-sulfoquinovose:DAG sulfoquinovosyltransferase activity	MF	1	2	0.0440378	1	1	0
GO:0009501	amyloplast	CC	1	2	0.0440522	1	1	0
GO:0033234	negative regulation of protein sumoylation	BP	1	2	0.0440522	1	1	0
GO:0045727	positive regulation of translation	BP	1	2	0.0440522	1	0	1
GO:0051980	iron-nicotianamine transmembrane transporter activity	MF	1	2	0.0440522	1	1	0
GO:0005991	trehalose metabolic process	BP	1	2	0.0440522	1	1	0
GO:0016040	glutamate synthase (NADH) activity	MF	1	2	0.0440522	1	1	0
GO:0016174	NAD(P)H oxidase activity	MF	1	2	0.0440522	1	1	0

## Sheet: Table 7
Table 7. Gene Ontology (GO) analysis of DEGs between oswrky53-osarf18-osrr22 and osrr22 roots under salt stress.
category	term	ontology	numDEInCat	numInCat	over_represented_pvalue	over_represented_FDR	GeneNumber(Up)	GeneNumber(Down)
GO:0055114	oxidation-reduction process	BP	195	1592	2.67443e-26	5.02525e-23	143	52
GO:0020037	heme binding	MF	102	581	8.24133e-26	1.03236e-22	79	23
GO:0004601	peroxidase activity	MF	46	182	4.72913e-19	4.44302e-16	41	5
GO:0005975	carbohydrate metabolic process	BP	74	431	5.42284e-18	4.07581e-15	66	8
GO:0006979	response to oxidative stress	BP	46	224	3.09079e-15	1.93586e-12	42	4
GO:0048046	apoplast	CC	55	303	6.88647e-15	3.69705e-12	47	8
GO:0005576	extracellular region	CC	40	190	1.44432e-14	6.78471e-12	39	1
GO:0004553	hydrolase activity, hydrolyzing O-glycosyl compounds	MF	50	278	1.24983e-13	5.21872e-11	45	5
GO:0009505	plant-type cell wall	CC	39	191	2.15556e-12	8.10061e-10	38	1
GO:0005506	iron ion binding	MF	69	526	1.62294e-11	5.54455e-09	48	21
GO:0005874	microtubule	CC	23	82	1.16053e-10	3.63441e-08	23	0
GO:0005618	cell wall	CC	53	390	2.25811e-10	6.52769e-08	50	3
GO:0009055	electron transfer activity	MF	71	604	3.5394e-10	9.50076e-08	49	22
GO:0007018	microtubule-based movement	BP	19	61	9.95677e-10	2.4945e-07	19	0
GO:0016705	oxidoreductase activity, acting on paired donors, with incorporation or reduction of molecular oxygen	MF	51	367	1.08846e-09	2.55653e-07	33	18
GO:0004497	monooxygenase activity	MF	46	336	1.67626e-08	3.70553e-06	31	15
GO:0005875	microtubule associated complex	CC	18	68	2.70563e-08	5.64875e-06	18	0
GO:0031012	extracellular matrix	CC	9	20	1.66561e-07	3.2944e-05	7	2
GO:0046872	metal ion binding	MF	78	819	2.0014e-07	3.76064e-05	61	17
GO:0019953	sexual reproduction	BP	9	20	3.80693e-07	6.81259e-05	9	0
GO:0003777	microtubule motor activity	MF	14	52	1.08304e-06	0.000185004	14	0
GO:0006949	syncytium formation	BP	6	10	4.8353e-06	0.000790046	6	0
GO:0045735	nutrient reservoir activity	MF	13	60	6.2013e-06	0.00097102	10	3
GO:0006073	cellular glucan metabolic process	BP	9	28	1.09419e-05	0.00162391	8	1
GO:0046658	anchored component of plasma membrane	CC	10	33	1.16154e-05	0.00162391	10	0
GO:0009664	plant-type cell wall organization	BP	10	39	1.16673e-05	0.00162391	10	0
GO:0016762	xyloglucan:xyloglucosyl transferase activity	MF	9	29	1.5155e-05	0.00203401	8	1
GO:0004565	beta-galactosidase activity	MF	7	16	2.10356e-05	0.00272593	5	2
GO:0009524	phragmoplast	CC	10	36	2.96625e-05	0.00371572	10	0
GO:0005507	copper ion binding	MF	30	253	3.39051e-05	0.00411018	27	3
GO:0004568	chitinase activity	MF	8	28	4.23804e-05	0.00497705	7	1
GO:0016021	integral component of membrane	CC	108	1331	6.8391e-05	0.00760402	85	23
GO:0016998	cell wall macromolecule catabolic process	BP	10	46	6.87963e-05	0.00760402	9	1
GO:0006270	DNA replication initiation	BP	5	9	8.1964e-05	0.00880059	5	0
GO:0008017	microtubule binding	MF	8	28	0.000151392	0.0158037	8	0
GO:0019252	starch biosynthetic process	BP	5	10	0.000157715	0.0160187	5	0
GO:0042555	MCM complex	CC	4	6	0.000183353	0.0181326	4	0
GO:0016760	cellulose synthase (UDP-forming) activity	MF	8	30	0.000254948	0.0245665	7	1
GO:0006032	chitin catabolic process	BP	7	28	0.000371877	0.0349378	6	1
GO:0005886	plasma membrane	CC	123	1616	0.000384181	0.0352134	102	21
GO:0003678	DNA helicase activity	MF	4	7	0.000407183	0.0364332	4	0
GO:0009651	response to salt stress	BP	29	268	0.000477684	0.0417474	27	2
GO:0016757	transferase activity, transferring glycosyl groups	MF	15	98	0.000491509	0.0419794	13	2
GO:0005737	cytoplasm	CC	37	366	0.000529564	0.0442245	27	10
GO:0006260	DNA replication	BP	11	60	0.000558865	0.0455154	11	0
GO:0016491	oxidoreductase activity	MF	43	477	0.000569245	0.0455154	24	19
GO:0005819	spindle	CC	6	19	0.00058994	0.0461874	6	0
GO:0030145	manganese ion binding	MF	9	49	0.000672408	0.0515696	7	2
GO:0042973	glucan endo-1,3-beta-D-glucosidase activity	MF	4	8	0.000706785	0.0531219	4	0
GO:0032508	DNA duplex unwinding	BP	5	14	0.000802743	0.0591511	5	0
GO:0000139	Golgi membrane	CC	7	28	0.00101774	0.0735511	6	1
GO:0048829	root cap development	BP	4	9	0.00129494	0.0918187	3	1
GO:0000786	nucleosome	CC	8	48	0.00132052	0.0918988	7	1
GO:0004737	pyruvate decarboxylase activity	MF	3	5	0.00148248	0.101294	3	0
GO:0010333	terpene synthase activity	MF	9	53	0.00153054	0.10271	8	1
GO:0030244	cellulose biosynthetic process	BP	8	39	0.00169072	0.111469	7	1
GO:0016788	hydrolase activity, acting on ester bonds	MF	22	212	0.00197816	0.125094	14	8
GO:0000287	magnesium ion binding	MF	19	163	0.00200171	0.125094	15	4
GO:0008878	glucose-1-phosphate adenylyltransferase activity	MF	3	5	0.0020291	0.125094	3	0
GO:0016114	terpenoid biosynthetic process	BP	3	5	0.00203053	0.125094	3	0
GO:0008643	carbohydrate transport	BP	8	45	0.00209086	0.126733	8	0
GO:0005773	vacuole	CC	42	475	0.0024855	0.148262	33	9
GO:0009871	jasmonic acid and ethylene-dependent systemic resistance, ethylene mediated signaling pathway	BP	3	6	0.0028518	0.167454	3	0
GO:0009574	preprophase band	CC	4	11	0.00291042	0.168267	4	0
GO:0016682	oxidoreductase activity, acting on diphenols and related substances as donors, oxygen as acceptor	MF	3	6	0.00318704	0.181468	3	0
GO:0051504	diterpene phytoalexin precursor biosynthetic process pathway	BP	2	2	0.00331431	0.185898	2	0
GO:0015116	sulfate transmembrane transporter activity	MF	2	2	0.00342852	0.187177	2	0
GO:0004459	L-lactate dehydrogenase activity	MF	2	2	0.00343672	0.187177	2	0
GO:0010455	positive regulation of cell fate commitment	BP	2	2	0.00355469	0.190836	2	0
GO:0033907	beta-D-fucosidase activity	MF	2	2	0.00367429	0.191894	2	0
GO:0007090	obsolete regulation of S phase of mitotic cell cycle	BP	2	2	0.00367653	0.191894	2	0
GO:0050832	defense response to fungus	BP	8	46	0.00381763	0.195567	8	0
GO:0008569	ATP-dependent microtubule motor activity, minus-end-directed	MF	3	6	0.00385097	0.195567	3	0
GO:0015018	galactosylgalactosylxylosylprotein 3-beta-glucuronosyltransferase activity	MF	4	13	0.00402067	0.201463	4	0
GO:0080079	cellobiose glucosidase activity	MF	3	7	0.00420086	0.205024	3	0
GO:0080083	beta-gentiobiose beta-glucosidase activity	MF	3	7	0.00420086	0.205024	3	0
GO:0005887	integral component of plasma membrane	CC	5	22	0.0043035	0.20734	5	0
GO:0009416	response to light stimulus	BP	9	57	0.00438883	0.208775	6	3
GO:0009826	unidimensional cell growth	BP	7	38	0.00484313	0.227506	7	0
GO:0003993	acid phosphatase activity	MF	8	50	0.00499952	0.231953	5	3
GO:0009644	response to high light intensity	BP	5	21	0.00567292	0.259986	4	1
GO:0004351	glutamate decarboxylase activity	MF	3	7	0.00607631	0.271781	2	1
GO:0006536	glutamate metabolic process	BP	3	7	0.00607631	0.271781	2	1
GO:0019825	oxygen binding	MF	3	8	0.0061954	0.271781	3	0
GO:0005978	glycogen biosynthetic process	BP	3	7	0.00621957	0.271781	3	0
GO:0000166	nucleotide binding	MF	58	765	0.00631593	0.272819	37	21
GO:0045926	negative regulation of growth	BP	2	3	0.00685214	0.290432	2	0
GO:0046274	lignin catabolic process	BP	5	21	0.0070834	0.291715	4	1
GO:0052716	hydroquinone:oxygen oxidoreductase activity	MF	5	21	0.0070834	0.291715	4	1
GO:0006833	water transport	BP	3	8	0.00714151	0.291715	3	0
GO:0005783	endoplasmic reticulum	CC	25	263	0.00768403	0.307653	20	5
GO:0080167	response to karrikin	BP	13	110	0.00769541	0.307653	11	2
GO:0005215	transporter activity	MF	19	186	0.00866036	0.342586	16	3
GO:0008970	phospholipase A1 activity	MF	3	8	0.00880384	0.342784	3	0
GO:0005524	ATP binding	MF	196	2885	0.00884779	0.342784	154	42
GO:0030976	thiamine pyrophosphate binding	MF	4	17	0.00918636	0.346017	3	1
GO:0005094	Rho GDP-dissociation inhibitor activity	MF	2	3	0.00920135	0.346017	2	0
GO:0044237	cellular metabolic process	BP	11	92	0.00920747	0.346017	9	2
GO:0008810	cellulase activity	MF	3	8	0.00946875	0.352313	3	0
GO:0016131	brassinosteroid metabolic process	BP	3	8	0.00958785	0.353007	2	1
GO:0009834	plant-type secondary cell wall biogenesis	BP	3	8	0.00975304	0.353007	3	0
GO:0006334	nucleosome assembly	BP	7	53	0.00976922	0.353007	6	1
GO:0015671	oxygen transport	BP	2	4	0.0100897	0.357708	2	0
GO:0008395	steroid hydroxylase activity	MF	2	3	0.0103945	0.361586	1	1
GO:0042547	cell wall modification involved in multidimensional cell growth	BP	2	3	0.0105057	0.361586	2	0
GO:0046785	microtubule polymerization	BP	2	3	0.010584	0.361586	2	0
GO:0000914	phragmoplast assembly	BP	2	3	0.010584	0.361586	2	0
GO:0004650	polygalacturonase activity	MF	7	45	0.0119017	0.401995	7	0
GO:0016042	lipid catabolic process	BP	6	35	0.0119807	0.401995	6	0
GO:0009817	defense response to fungus, incompatible interaction	BP	8	60	0.0120907	0.402095	7	1
GO:0016717	oxidoreductase activity, acting on paired donors, with oxidation of a pair of donors resulting in the reduction of molecular oxygen to two molecules of water	MF	3	9	0.0123261	0.40633	3	0
GO:0008061	chitin binding	MF	4	19	0.012935	0.422694	4	0
GO:0009640	photomorphogenesis	BP	5	25	0.0132033	0.427742	4	1
GO:0009926	auxin polar transport	BP	3	9	0.0135027	0.433701	3	0
GO:0030245	cellulose catabolic process	BP	3	9	0.0136456	0.434126	3	0
GO:0009538	photosystem I reaction center	CC	2	4	0.0137469	0.434126	0	2
GO:0009800	cinnamic acid biosynthetic process	BP	3	9	0.0141901	0.440713	1	2
GO:0045548	phenylalanine ammonia-lyase activity	MF	3	9	0.0141901	0.440713	1	2
GO:0000910	cytokinesis	BP	5	26	0.014432	0.444554	5	0
GO:0030001	metal ion transport	BP	7	54	0.0146413	0.445054	6	1
GO:0009624	response to nematode	BP	11	89	0.0147518	0.445054	11	0
GO:0030246	carbohydrate binding	MF	17	170	0.0149043	0.445054	14	3
GO:0048564	photosystem I assembly	BP	2	4	0.014922	0.445054	0	2
GO:0042542	response to hydrogen peroxide	BP	5	26	0.015461	0.4575	5	0
GO:0009627	systemic acquired resistance	BP	4	19	0.017286	0.507506	3	1
GO:0019898	extrinsic component of membrane	CC	4	21	0.0177333	0.516604	0	4
GO:0046592	polyamine oxidase activity	MF	2	4	0.0183676	0.530966	2	0
GO:0019139	cytokinin dehydrogenase activity	MF	3	10	0.0186677	0.53552	1	2
GO:0006559	L-phenylalanine catabolic process	BP	3	10	0.0193686	0.547	1	2
GO:0071446	cellular response to salicylic acid stimulus	BP	2	4	0.0194283	0.547	1	1
GO:0000234	phosphoethanolamine N-methyltransferase activity	MF	2	4	0.0195417	0.547	2	0
GO:0042389	omega-3 fatty acid desaturase activity	MF	2	4	0.0199004	0.547	2	0
GO:0006468	protein phosphorylation	BP	114	1647	0.0200396	0.547	88	26
GO:0010385	double-stranded methylated DNA binding	MF	2	4	0.0203172	0.547	2	0
GO:0009674	potassium:sodium symporter activity	MF	2	4	0.0203172	0.547	2	0
GO:0043140	ATP-dependent 3'-5' DNA helicase activity	MF	2	4	0.0203172	0.547	2	0
GO:0008152	metabolic process	BP	61	874	0.0206102	0.547	44	17
GO:0010073	meristem maintenance	BP	3	11	0.020746	0.547	3	0
GO:0003887	DNA-directed DNA polymerase activity	MF	5	27	0.0207754	0.547	5	0
GO:0008200	ion channel inhibitor activity	MF	1	1	0.0209601	0.547	1	0
GO:0009405	pathogenesis	BP	1	1	0.0209601	0.547	1	0
GO:0050662	coenzyme binding	MF	11	102	0.0219695	0.569389	8	3
GO:0016818	hydrolase activity, acting on acid anhydrides, in phosphorus-containing anhydrides	MF	3	11	0.0230848	0.594197	3	0
GO:0003999	adenine phosphoribosyltransferase activity	MF	2	5	0.0235256	0.59736	1	1
GO:0006168	adenine salvage	BP	2	5	0.0235256	0.59736	1	1
GO:0016020	membrane	CC	144	2287	0.0237211	0.598282	108	36
GO:0009958	positive gravitropism	BP	3	11	0.0242616	0.607551	3	0
GO:0080170	hydrogen peroxide transmembrane transport	BP	2	5	0.0244914	0.607551	2	0
GO:0009723	response to ethylene	BP	6	40	0.0245736	0.607551	6	0
GO:0032957	inositol trisphosphate metabolic process	BP	3	11	0.024996	0.610352	2	1
GO:0006813	potassium ion transport	BP	4	20	0.0250118	0.610352	3	1
GO:0009654	photosystem II oxygen evolving complex	CC	4	24	0.0267879	0.647083	0	4
GO:0006571	tyrosine biosynthetic process	BP	2	5	0.0268613	0.647083	1	1
GO:0016706	oxidoreductase activity, acting on paired donors, with incorporation or reduction of molecular oxygen, 2-oxoglutarate as one donor, and incorporation of one atom each of oxygen into both donors	MF	12	119	0.027314	0.653796	9	3
GO:0048040	UDP-glucuronate decarboxylase activity	MF	2	5	0.0277797	0.660734	2	0
GO:0006631	fatty acid metabolic process	BP	3	12	0.0284145	0.671583	2	1
GO:0051119	sugar transmembrane transporter activity	MF	3	15	0.0294596	0.691933	3	0
GO:0060416	response to growth hormone	BP	4	25	0.0298229	0.692771	3	1
GO:0009414	response to water deprivation	BP	10	90	0.0304188	0.692771	8	2
GO:0004197	cysteine-type endopeptidase activity	MF	4	21	0.0305794	0.692771	2	2
GO:0017089	glycolipid transporter activity	MF	2	6	0.0306014	0.692771	1	1
GO:0046836	glycolipid transport	BP	2	6	0.0306014	0.692771	1	1
GO:0051861	glycolipid binding	MF	2	6	0.0306014	0.692771	1	1
GO:0005876	spindle microtubule	CC	2	5	0.0310916	0.696555	2	0
GO:0080086	stamen filament development	BP	2	5	0.031285	0.696555	2	0
GO:0006656	phosphatidylcholine biosynthetic process	BP	2	5	0.031484	0.696555	2	0
GO:0006950	response to stress	BP	12	120	0.0316366	0.696555	8	4
GO:0010268	brassinosteroid homeostasis	BP	2	5	0.0321733	0.696555	1	1
GO:0008725	DNA-3-methyladenine glycosylase activity	MF	2	5	0.0322497	0.696555	2	0
GO:0010067	procambium histogenesis	BP	2	5	0.0324367	0.696555	2	0
GO:0046030	inositol trisphosphate phosphatase activity	MF	2	5	0.0324367	0.696555	2	0
GO:0046855	inositol phosphate dephosphorylation	BP	2	5	0.0324367	0.696555	2	0
GO:0047668	amygdalin beta-glucosidase activity	MF	2	6	0.0334775	0.703445	2	0
GO:0080081	4-methylumbelliferyl-beta-D-glucopyranoside beta-glucosidase activity	MF	2	6	0.0334775	0.703445	2	0
GO:0080082	esculin beta-glucosidase activity	MF	2	6	0.0334775	0.703445	2	0
GO:0047800	cysteamine dioxygenase activity	MF	3	13	0.0336932	0.703445	3	0
GO:0045330	aspartyl esterase activity	MF	6	45	0.0336935	0.703445	6	0
GO:0006629	lipid metabolic process	BP	21	250	0.0342968	0.712084	13	8
GO:0048437	floral organ development	BP	2	6	0.0353244	0.72939	1	1
GO:0008272	sulfate transport	BP	3	13	0.0355996	0.731056	2	1
GO:0042545	cell wall modification	BP	6	48	0.0392868	0.794085	6	0
GO:0005200	structural constituent of cytoskeleton	MF	3	13	0.0395808	0.794085	3	0
GO:0009615	response to virus	BP	3	15	0.0399935	0.794085	2	1
GO:0009704	de-etiolation	BP	4	27	0.0405149	0.794085	3	1
GO:0031408	oxylipin biosynthetic process	BP	4	23	0.0408273	0.794085	2	2
GO:0055085	transmembrane transport	BP	35	446	0.0411722	0.794085	26	9
GO:0042732	D-xylose metabolic process	BP	2	6	0.0412147	0.794085	2	0
GO:0016298	lipase activity	MF	2	6	0.0419555	0.794085	0	2
GO:0044255	cellular lipid metabolic process	BP	1	1	0.0438057	0.794085	0	1
GO:0046982	protein heterodimerization activity	MF	7	70	0.043888	0.794085	5	2
GO:0005516	calmodulin binding	MF	7	64	0.0444952	0.794085	6	1
GO:0051567	histone H3-K9 methylation	BP	2	6	0.044953	0.794085	2	0
GO:0005089	Rho guanyl-nucleotide exchange factor activity	MF	3	15	0.0467615	0.794085	3	0
GO:0009360	DNA polymerase III complex	CC	2	6	0.0468235	0.794085	2	0
GO:0004003	ATP-dependent DNA helicase activity	MF	3	14	0.0476841	0.794085	3	0
GO:0009690	cytokinin metabolic process	BP	3	14	0.047853	0.794085	1	2
GO:0010279	indole-3-acetic acid amido synthetase activity	MF	2	7	0.048927	0.794085	2	0
GO:0004672	protein kinase activity	MF	26	334	0.0490185	0.794085	19	7
GO:0004170	dUTP diphosphatase activity	MF	1	1	0.0492087	0.794085	1	0
GO:0006226	dUMP biosynthetic process	BP	1	1	0.0492087	0.794085	1	0
GO:0046080	dUTP metabolic process	BP	1	1	0.0492087	0.794085	1	0
GO:0016471	vacuolar proton-transporting V-type ATPase complex	CC	1	1	0.0498996	0.794085	1	0

## Sheet: Table 8
Table 8. Gene Ontology (GO) analysis of DEGs between oswrky53-osarf18-osrr22 and WT roots under salt stress.
category	term	ontology	numDEInCat	numInCat	over_represented_pvalue	over_represented_FDR	GeneNumber(Up)	GeneNumber(Down)
GO:0055114	oxidation-reduction process	BP	312	1592	1.07464e-40	4.03851e-37	221	91
GO:0048046	apoplast	CC	90	303	1.56223e-24	1.71577e-21	75	15
GO:0020037	heme binding	MF	133	581	1.82626e-24	1.71577e-21	100	33
GO:0004601	peroxidase activity	MF	60	182	3.02061e-20	2.27029e-17	51	9
GO:0009505	plant-type cell wall	CC	60	191	9.66202e-18	6.05165e-15	54	6
GO:0006979	response to oxidative stress	BP	61	224	6.20053e-16	3.3288e-13	49	12
GO:0005874	microtubule	CC	33	82	9.08841e-14	4.26928e-11	33	0
GO:0005875	microtubule associated complex	CC	29	68	3.39459e-13	1.41743e-10	27	2
GO:0005506	iron ion binding	MF	100	526	4.37626e-13	1.6446e-10	65	35
GO:0005975	carbohydrate metabolic process	BP	87	431	1.29533e-12	4.42533e-10	59	28
GO:0005576	extracellular region	CC	48	190	1.55994e-12	4.8852e-10	45	3
GO:0007018	microtubule-based movement	BP	27	61	1.91119e-12	5.5248e-10	27	0
GO:0046658	anchored component of plasma membrane	CC	19	33	8.71566e-12	2.33953e-09	18	1
GO:0004553	hydrolase activity, hydrolyzing O-glycosyl compounds	MF	61	278	5.01322e-11	1.25598e-08	45	16
GO:0005507	copper ion binding	MF	55	253	9.99997e-11	2.34874e-08	48	7
GO:0005618	cell wall	CC	73	390	1.44379e-10	3.19163e-08	65	8
GO:0046872	metal ion binding	MF	121	819	1.59838e-09	3.33706e-07	83	38
GO:0003777	microtubule motor activity	MF	21	52	4.14396e-09	8.19631e-07	21	0
GO:0046274	lignin catabolic process	BP	13	21	8.71599e-09	1.55975e-06	12	1
GO:0052716	hydroquinone:oxygen oxidoreductase activity	MF	13	21	8.71599e-09	1.55975e-06	12	1
GO:0009055	electron transfer activity	MF	95	604	9.37772e-09	1.60189e-06	59	36
GO:0009664	plant-type cell wall organization	BP	16	39	1.15853e-08	1.89294e-06	16	0
GO:0005886	plasma membrane	CC	214	1616	1.43227e-08	2.2427e-06	168	46
GO:0016021	integral component of membrane	CC	179	1331	4.78477e-08	7.19247e-06	135	44
GO:0004497	monooxygenase activity	MF	62	336	6.71899e-08	9.71153e-06	40	22
GO:0016757	transferase activity, transferring glycosyl groups	MF	28	98	7.49512e-08	1.04321e-05	21	7
GO:0016705	oxidoreductase activity, acting on paired donors, with incorporation or reduction of molecular oxygen	MF	65	367	8.31492e-08	1.11598e-05	40	25
GO:0046686	response to cadmium ion	BP	60	333	1.79594e-07	2.3273e-05	51	9
GO:0030244	cellulose biosynthetic process	BP	16	39	2.59831e-07	3.25482e-05	15	1
GO:0080167	response to karrikin	BP	28	110	3.80475e-07	4.61234e-05	21	7
GO:0006629	lipid metabolic process	BP	47	250	8.54772e-07	0.000100382	34	13
GO:0042555	MCM complex	CC	6	6	1.02557e-06	0.000116791	6	0
GO:0016760	cellulose synthase (UDP-forming) activity	MF	13	30	1.60765e-06	0.000177693	13	0
GO:0006073	cellular glucan metabolic process	BP	12	28	1.89801e-06	0.000203792	11	1
GO:0006950	response to stress	BP	28	120	2.03725e-06	0.000212667	12	16
GO:0016762	xyloglucan:xyloglucosyl transferase activity	MF	12	29	2.99061e-06	0.000303749	11	1
GO:0005524	ATP binding	MF	344	2885	4.22534e-06	0.000417864	258	86
GO:0004565	beta-galactosidase activity	MF	9	16	6.1219e-06	0.0005899	6	3
GO:0005737	cytoplasm	CC	61	366	6.31651e-06	0.000593436	46	15
GO:0003678	DNA helicase activity	MF	6	7	6.56151e-06	0.000601418	6	0
GO:0009744	response to sucrose	BP	10	22	7.70704e-06	0.000689597	9	1
GO:0009524	phragmoplast	CC	13	36	1.77264e-05	0.00154921	13	0
GO:0005819	spindle	CC	9	19	2.98369e-05	0.00254834	9	0
GO:0016706	oxidoreductase activity, acting on paired donors, with incorporation or reduction of molecular oxygen, 2-oxoglutarate as one donor, and incorporation of one atom each of oxygen into both donors	MF	25	119	3.67768e-05	0.00307127	16	9
GO:0009651	response to salt stress	BP	45	268	4.49173e-05	0.00366955	38	7
GO:0006270	DNA replication initiation	BP	6	9	6.39536e-05	0.00511357	6	0
GO:0005992	trehalose biosynthetic process	BP	10	27	7.86902e-05	0.00616078	3	7
GO:0006949	syncytium formation	BP	6	10	8.31047e-05	0.00637362	5	1
GO:0032508	DNA duplex unwinding	BP	7	14	0.000126929	0.00953995	7	0
GO:0008152	metabolic process	BP	108	874	0.000157068	0.0115738	65	43
GO:0019953	sexual reproduction	BP	8	20	0.000178394	0.0128924	8	0
GO:0030001	metal ion transport	BP	13	54	0.000200264	0.0141998	10	3
GO:0016998	cell wall macromolecule catabolic process	BP	12	46	0.000204103	0.0142041	9	3
GO:0000166	nucleotide binding	MF	97	765	0.000213791	0.0146078	56	41
GO:0030170	pyridoxal phosphate binding	MF	24	114	0.000225338	0.0151218	16	8
GO:0009543	chloroplast thylakoid lumen	CC	9	26	0.000233847	0.0151481	0	9
GO:0009753	response to jasmonic acid	BP	12	40	0.000237303	0.0151481	6	6
GO:0006833	water transport	BP	5	8	0.000237822	0.0151481	5	0
GO:0006032	chitin catabolic process	BP	9	28	0.000258828	0.0162112	6	3
GO:0006468	protein phosphorylation	BP	197	1647	0.000272482	0.0167867	148	49
GO:0009834	plant-type secondary cell wall biogenesis	BP	5	8	0.000428129	0.0259501	4	1
GO:0016114	terpenoid biosynthetic process	BP	4	5	0.00046802	0.0279177	3	1
GO:0015979	photosynthesis	BP	17	90	0.000490997	0.0288307	3	14
GO:0005773	vacuole	CC	66	475	0.000500008	0.0289082	50	16
GO:0006633	fatty acid biosynthetic process	BP	18	86	0.000516775	0.0294249	16	2
GO:0016491	oxidoreductase activity	MF	63	477	0.000574602	0.0314834	36	27
GO:0015297	antiporter activity	MF	12	45	0.000579452	0.0314834	9	3
GO:0031012	extracellular matrix	CC	7	20	0.000605265	0.0314834	6	1
GO:0003872	6-phosphofructokinase activity	MF	7	17	0.00060789	0.0314834	6	1
GO:0005945	6-phosphofructokinase complex	CC	7	17	0.00060789	0.0314834	6	1
GO:0006855	drug transmembrane transport	BP	12	45	0.000611572	0.0314834	9	3
GO:0015238	drug transmembrane transporter activity	MF	12	45	0.000611572	0.0314834	9	3
GO:0016788	hydrolase activity, acting on ester bonds	MF	33	212	0.000647554	0.0325021	27	6
GO:0016020	membrane	CC	244	2287	0.000648658	0.0325021	178	66
GO:0019898	extrinsic component of membrane	CC	7	21	0.000848971	0.0419794	0	7
GO:0008017	microtubule binding	MF	9	28	0.000942679	0.0459521	9	0
GO:0009535	chloroplast thylakoid membrane	CC	38	274	0.000953769	0.0459521	6	32
GO:0044445	cytosolic part	CC	3	3	0.00101361	0.0470265	3	0
GO:0010442	guard cell morphogenesis	BP	3	3	0.00101361	0.0470265	3	0
GO:0052541	plant-type cell wall cellulose metabolic process	BP	3	3	0.00101361	0.0470265	3	0
GO:0004568	chitinase activity	MF	8	28	0.00113691	0.0521037	6	2
GO:0006260	DNA replication	BP	14	60	0.00120588	0.0545989	13	1
GO:0048527	lateral root development	BP	10	40	0.00122334	0.0547298	9	1
GO:0008569	ATP-dependent microtubule motor activity, minus-end-directed	MF	4	6	0.00127868	0.0565327	4	0
GO:0050662	coenzyme binding	MF	19	102	0.00144314	0.0630618	10	9
GO:0010279	indole-3-acetic acid amido synthetase activity	MF	4	7	0.0015528	0.0663574	4	0
GO:0009611	response to wounding	BP	21	120	0.00155387	0.0663574	11	10
GO:0009507	chloroplast	CC	105	914	0.00159248	0.0669428	62	43
GO:0006096	glycolytic process	BP	16	74	0.00160321	0.0669428	14	2
GO:0019252	starch biosynthetic process	BP	5	10	0.00165184	0.0675802	5	0
GO:0007017	microtubule-based process	BP	8	27	0.00165444	0.0675802	6	2
GO:0009617	response to bacterium	BP	9	33	0.00169487	0.0684686	6	3
GO:0005740	mitochondrial envelope	CC	4	7	0.00171263	0.0684686	4	0
GO:0009416	response to light stimulus	BP	13	57	0.00182497	0.0704255	9	4
GO:0045300	acyl-[acyl-carrier-protein] desaturase activity	MF	4	7	0.00183448	0.0704255	3	1
GO:0031982	vesicle	CC	3	4	0.00183653	0.0704255	3	0
GO:0090344	negative regulation of cell aging	BP	3	4	0.00183653	0.0704255	3	0
GO:0009654	photosystem II oxygen evolving complex	CC	7	24	0.00186452	0.0707763	0	7
GO:0009538	photosystem I reaction center	CC	3	4	0.00193621	0.0727627	0	3
GO:0000910	cytokinesis	BP	8	26	0.00198479	0.07385	8	0
GO:0000786	nucleosome	CC	10	48	0.00203672	0.0750392	8	2
GO:0006002	fructose 6-phosphate metabolic process	BP	6	15	0.00223778	0.0816465	5	1
GO:0008061	chitin binding	MF	6	19	0.00293596	0.10609	4	2
GO:0006631	fatty acid metabolic process	BP	5	12	0.00345082	0.123507	3	2
GO:0009414	response to water deprivation	BP	17	90	0.00355687	0.126101	13	4
GO:0009809	lignin biosynthetic process	BP	6	18	0.0036911	0.129258	5	1
GO:0006809	nitric oxide biosynthetic process	BP	3	4	0.00374561	0.129258	2	1
GO:0009674	potassium:sodium symporter activity	MF	3	4	0.00374911	0.129258	2	1
GO:0016758	transferase activity, transferring hexosyl groups	MF	38	297	0.00379697	0.129718	24	14
GO:0007062	sister chromatid cohesion	BP	4	8	0.00390838	0.132322	4	0
GO:0009704	de-etiolation	BP	7	27	0.0040973	0.137479	6	1
GO:0004674	protein serine/threonine kinase activity	MF	156	1348	0.00426248	0.141756	116	40
GO:0008970	phospholipase A1 activity	MF	4	8	0.0043046	0.141901	4	0
GO:0010333	terpene synthase activity	MF	11	53	0.00434543	0.141906	9	2
GO:0031408	oxylipin biosynthetic process	BP	7	23	0.00440034	0.141906	3	4
GO:0004616	phosphogluconate dehydrogenase (decarboxylating) activity	MF	4	8	0.00441805	0.141906	1	3
GO:0042973	glucan endo-1,3-beta-D-glucosidase activity	MF	4	8	0.00463252	0.147534	4	0
GO:0009624	response to nematode	BP	17	89	0.00473139	0.149416	12	5
GO:0051781	positive regulation of cell division	BP	3	5	0.00518291	0.162311	1	2
GO:0080170	hydrogen peroxide transmembrane transport	BP	3	5	0.00539533	0.167567	3	0
GO:0004737	pyruvate decarboxylase activity	MF	3	5	0.00617392	0.190177	3	0
GO:0005200	structural constituent of cytoskeleton	MF	5	13	0.00636609	0.194502	5	0
GO:0019752	carboxylic acid metabolic process	BP	4	9	0.00656693	0.197428	1	3
GO:0046688	response to copper ion	BP	4	9	0.00667808	0.199176	3	1
GO:0009941	chloroplast envelope	CC	42	306	0.00725049	0.214546	24	18
GO:0006573	valine metabolic process	BP	3	5	0.00750355	0.217765	0	3
GO:0008442	3-hydroxyisobutyrate dehydrogenase activity	MF	3	5	0.00750355	0.217765	0	3
GO:0009409	response to cold	BP	27	183	0.00753311	0.217765	20	7
GO:0000287	magnesium ion binding	MF	25	163	0.00770042	0.21837	22	3
GO:0016846	carbon-sulfur lyase activity	MF	3	5	0.00771506	0.21837	2	1
GO:0045735	nutrient reservoir activity	MF	11	60	0.00772837	0.21837	8	3
GO:0009607	response to biotic stimulus	BP	7	29	0.00784355	0.218819	4	3
GO:0009926	auxin polar transport	BP	4	9	0.00787994	0.218819	3	1
GO:0008146	sulfotransferase activity	MF	8	37	0.00791893	0.218819	8	0
GO:0030245	cellulose catabolic process	BP	4	9	0.00800042	0.219457	4	0
GO:0048829	root cap development	BP	4	9	0.00824354	0.220264	3	1
GO:0050832	defense response to fungus	BP	10	46	0.00832292	0.220264	7	3
GO:0010588	cotyledon vascular tissue pattern formation	BP	4	9	0.00837928	0.220264	3	1
GO:0006346	methylation-dependent chromatin silencing	BP	3	5	0.00845435	0.220264	3	0
GO:0009800	cinnamic acid biosynthetic process	BP	4	9	0.00846356	0.220264	2	2
GO:0045548	phenylalanine ammonia-lyase activity	MF	4	9	0.00846356	0.220264	2	2
GO:0016324	apical plasma membrane	CC	3	5	0.00864339	0.220264	3	0
GO:0008878	glucose-1-phosphate adenylyltransferase activity	MF	3	5	0.00866419	0.220264	3	0
GO:0009827	plant-type cell wall modification	BP	3	5	0.00866929	0.220264	2	1
GO:0047334	diphosphate-fructose-6-phosphate 1-phosphotransferase activity	MF	3	5	0.00867071	0.220264	3	0
GO:0003906	DNA-(apurinic or apyrimidinic site) endonuclease activity	MF	2	2	0.00867457	0.220264	2	0
GO:0030410	nicotianamine synthase activity	MF	2	2	0.00891173	0.223269	0	2
GO:0030418	nicotianamine biosynthetic process	BP	2	2	0.00891173	0.223269	0	2
GO:0051504	diterpene phytoalexin precursor biosynthetic process pathway	BP	2	2	0.00900589	0.224133	2	0
GO:0004459	L-lactate dehydrogenase activity	MF	2	2	0.00937285	0.231731	2	0
GO:0016621	cinnamoyl-CoA reductase activity	MF	2	2	0.00951619	0.233737	2	0
GO:0045550	geranylgeranyl reductase activity	MF	2	2	0.00972089	0.234122	1	1
GO:0016102	diterpenoid biosynthetic process	BP	2	2	0.00990268	0.234122	2	0
GO:0036201	ent-isokaurene C2-hydroxylase activity	MF	2	2	0.00990268	0.234122	2	0
GO:0034256	chlorophyll(ide) b reductase activity	MF	2	2	0.0100278	0.234122	0	2
GO:0033907	beta-D-fucosidase activity	MF	2	2	0.0100858	0.234122	2	0
GO:0004614	phosphoglucomutase activity	MF	2	2	0.0100925	0.234122	2	0
GO:0003871	5-methyltetrahydropteroyltriglutamate-homocysteine S-methyltransferase activity	MF	2	2	0.0100925	0.234122	2	0
GO:0007164	establishment of tissue polarity	BP	2	2	0.0100925	0.234122	2	0
GO:0008661	1-deoxy-D-xylulose-5-phosphate synthase activity	MF	2	2	0.0100925	0.234122	1	1
GO:0009723	response to ethylene	BP	9	40	0.010336	0.238299	6	3
GO:0060416	response to growth hormone	BP	6	25	0.0104754	0.239592	6	0
GO:0004664	prephenate dehydratase activity	MF	4	11	0.0105196	0.239592	3	1
GO:0071944	cell periphery	CC	4	12	0.0106369	0.240805	4	0
GO:0010075	regulation of meristem growth	BP	4	10	0.0111878	0.251759	1	3
GO:0009871	jasmonic acid and ethylene-dependent systemic resistance, ethylene mediated signaling pathway	BP	3	6	0.0115613	0.258615	2	1
GO:0004197	cysteine-type endopeptidase activity	MF	6	21	0.0117189	0.26059	3	3
GO:0010196	nonphotochemical quenching	BP	3	6	0.012001	0.265293	0	3
GO:0005215	transporter activity	MF	27	186	0.0122525	0.269269	19	8
GO:0042128	nitrate assimilation	BP	3	6	0.0128037	0.276616	3	0
GO:0030246	carbohydrate binding	MF	25	170	0.0128991	0.276616	20	5
GO:0046556	alpha-L-arabinofuranosidase activity	MF	4	10	0.0129944	0.276616	3	1
GO:0006559	L-phenylalanine catabolic process	BP	4	10	0.0129946	0.276616	2	2
GO:0016682	oxidoreductase activity, acting on diphenols and related substances as donors, oxygen as acceptor	MF	3	6	0.0130285	0.276616	3	0
GO:0010181	FMN binding	MF	8	35	0.0132449	0.279631	4	4
GO:0016123	xanthophyll biosynthetic process	BP	3	6	0.0139353	0.292564	1	2
GO:0051258	protein polymerization	BP	6	22	0.0145564	0.303906	6	0
GO:0048765	root hair cell differentiation	BP	3	6	0.0152348	0.316311	3	0
GO:0009570	chloroplast stroma	CC	41	319	0.0157317	0.323375	31	10
GO:0004356	glutamate-ammonia ligase activity	MF	3	6	0.0158331	0.323375	2	1
GO:0006542	glutamine biosynthetic process	BP	3	6	0.0158331	0.323375	2	1
GO:0016831	carboxy-lyase activity	MF	4	11	0.0162441	0.328217	2	2
GO:0016818	hydrolase activity, acting on acid anhydrides, in phosphorus-containing anhydrides	MF	4	11	0.0163803	0.328217	3	1
GO:0080079	cellobiose glucosidase activity	MF	3	7	0.0164196	0.328217	3	0
GO:0080083	beta-gentiobiose beta-glucosidase activity	MF	3	7	0.0164196	0.328217	3	0
GO:0043086	negative regulation of catalytic activity	BP	18	125	0.0166836	0.331729	11	7
GO:0009860	pollen tube growth	BP	13	71	0.0169276	0.334809	8	5
GO:0009574	preprophase band	CC	4	11	0.0173357	0.340602	4	0
GO:0044262	cellular carbohydrate metabolic process	BP	5	17	0.0174854	0.340602	5	0
GO:0045926	negative regulation of growth	BP	2	3	0.0175179	0.340602	2	0
GO:0009958	positive gravitropism	BP	4	11	0.017583	0.340602	3	1
GO:0006355	regulation of transcription, DNA-templated	BP	100	930	0.0188812	0.363874	52	48
GO:0022857	transmembrane transporter activity	MF	8	41	0.0193094	0.369623	6	2
GO:0030042	actin filament depolymerization	BP	3	9	0.0193954	0.369623	3	0
GO:0009751	response to salicylic acid	BP	9	43	0.0194746	0.369623	6	3
GO:0006098	pentose-phosphate shunt	BP	5	17	0.0196632	0.369816	1	4
GO:0042742	defense response to bacterium	BP	19	126	0.0196816	0.369816	12	7
GO:0009094	L-phenylalanine biosynthetic process	BP	4	13	0.0200944	0.375695	3	1
GO:0009620	response to fungus	BP	5	17	0.0207969	0.386905	4	1
GO:0009506	plasmodesma	CC	3	8	0.0209668	0.388145	2	1
GO:0009826	unidimensional cell growth	BP	8	38	0.0212145	0.390804	8	0
GO:0015018	galactosylgalactosylxylosylprotein 3-beta-glucuronosyltransferase activity	MF	4	13	0.0223341	0.409423	4	0
GO:0004805	trehalose-phosphatase activity	MF	3	7	0.0225787	0.411896	2	1
GO:0016119	carotene metabolic process	BP	2	3	0.0230955	0.419289	1	1
GO:0019825	oxygen binding	MF	3	8	0.0235457	0.421289	3	0
GO:0009750	response to fructose	BP	3	7	0.0239505	0.421289	2	1
GO:0051537	2 iron, 2 sulfur cluster binding	MF	7	33	0.0241859	0.421289	1	6
GO:0004024	alcohol dehydrogenase activity, zinc-dependent	MF	2	3	0.0242217	0.421289	2	0
GO:0005856	cytoskeleton	CC	6	25	0.0243737	0.421289	6	0
GO:0015671	oxygen transport	BP	2	4	0.024408	0.421289	2	0
GO:0010167	response to nitrate	BP	4	13	0.0245878	0.421289	4	0
GO:0010026	trichome differentiation	BP	3	7	0.0248793	0.421289	3	0
GO:0005978	glycogen biosynthetic process	BP	3	7	0.0249137	0.421289	3	0
GO:0009556	microsporogenesis	BP	3	7	0.0254468	0.421289	3	0
GO:0000776	kinetochore	CC	2	3	0.0256522	0.421289	2	0
GO:0016987	sigma factor activity	MF	3	7	0.0257862	0.421289	0	3
GO:0009044	xylan 1,4-beta-xylosidase activity	MF	3	7	0.0260023	0.421289	3	0
GO:0003700	DNA-binding transcription factor activity	MF	48	413	0.0261938	0.421289	20	28
GO:0006457	protein folding	BP	21	148	0.0262139	0.421289	12	9
GO:0033993	response to lipid	BP	2	4	0.0262746	0.421289	0	2
GO:0004127	cytidylate kinase activity	MF	2	3	0.0263422	0.421289	2	0
GO:0047800	cysteamine dioxygenase activity	MF	4	13	0.0269344	0.421289	4	0
GO:0008200	ion channel inhibitor activity	MF	1	1	0.0271937	0.421289	1	0
GO:0009405	pathogenesis	BP	1	1	0.0271937	0.421289	1	0
GO:0009682	induced systemic resistance	BP	2	3	0.0274143	0.421289	1	1
GO:0071369	cellular response to ethylene stimulus	BP	2	3	0.0274364	0.421289	0	2
GO:0006344	maintenance of chromatin silencing	BP	2	3	0.0274524	0.421289	2	0
GO:0032197	transposition, RNA-mediated	BP	2	3	0.0274524	0.421289	2	0
GO:0044030	regulation of DNA methylation	BP	2	3	0.0274524	0.421289	2	0
GO:0051574	positive regulation of histone H3-K9 methylation	BP	2	3	0.0274524	0.421289	2	0
GO:0090241	negative regulation of histone H4 acetylation	BP	2	3	0.0274524	0.421289	2	0
GO:0016628	oxidoreductase activity, acting on the CH-CH group of donors, NAD or NADP as acceptor	MF	2	3	0.0275664	0.421289	1	1
GO:0010078	maintenance of root meristem identity	BP	2	3	0.027587	0.421289	1	1
GO:0009978	allene oxide synthase activity	MF	2	3	0.0278157	0.421289	1	1
GO:0031407	oxylipin metabolic process	BP	2	3	0.0278157	0.421289	1	1
GO:0010304	PSII associated light-harvesting complex II catabolic process	BP	2	3	0.0281336	0.421289	0	2
GO:0006874	cellular calcium ion homeostasis	BP	2	3	0.0281495	0.421289	2	0
GO:0004421	hydroxymethylglutaryl-CoA synthase activity	MF	2	3	0.0281584	0.421289	2	0
GO:0004315	3-oxoacyl-[acyl-carrier-protein] synthase activity	MF	2	3	0.0282172	0.421289	2	0
GO:0000239	pachytene	BP	2	3	0.028224	0.421289	2	0
GO:0007135	meiosis II	BP	2	3	0.028224	0.421289	2	0
GO:0051445	regulation of meiotic cell cycle	BP	2	3	0.028224	0.421289	2	0
GO:0009817	defense response to fungus, incompatible interaction	BP	10	60	0.0282402	0.421289	5	5
GO:0003896	DNA primase activity	MF	2	3	0.028248	0.421289	2	0
GO:0006269	DNA replication, synthesis of RNA primer	BP	2	3	0.028248	0.421289	2	0
GO:0046785	microtubule polymerization	BP	2	3	0.0282504	0.421289	2	0
GO:0000914	phragmoplast assembly	BP	2	3	0.0282504	0.421289	2	0
GO:0009703	nitrate reductase (NADH) activity	MF	2	3	0.0282504	0.421289	2	0
GO:0007076	mitotic chromosome condensation	BP	2	3	0.0282504	0.421289	2	0
GO:0009749	response to glucose	BP	4	13	0.0287843	0.427555	3	1
GO:0015629	actin cytoskeleton	CC	3	10	0.0297974	0.440861	3	0
GO:0016036	cellular response to phosphate starvation	BP	10	55	0.0304734	0.449095	8	2
GO:0000103	sulfate assimilation	BP	3	8	0.0310331	0.455556	3	0
GO:0051287	NAD binding	MF	11	63	0.0314143	0.459357	8	3
GO:0016866	intramolecular transferase activity	MF	4	14	0.0320625	0.467018	3	1
GO:0006869	lipid transport	BP	6	33	0.032435	0.47062	5	1
GO:0009086	methionine biosynthetic process	BP	4	14	0.0326289	0.471614	4	0
GO:0008643	carbohydrate transport	BP	8	45	0.0345367	0.497275	6	2
GO:0007275	multicellular organism development	BP	9	56	0.0351149	0.503672	4	5
GO:0010005	cortical microtubule, transverse to long axis	CC	3	8	0.0363557	0.509752	3	0
GO:0008422	beta-glucosidase activity	MF	4	14	0.0364158	0.509752	2	2
GO:0006334	nucleosome assembly	BP	8	53	0.0364923	0.509752	6	2
GO:0004675	transmembrane receptor protein serine/threonine kinase activity	MF	6	26	0.0365335	0.509752	6	0
GO:0007178	transmembrane receptor protein serine/threonine kinase signaling pathway	BP	6	26	0.0365335	0.509752	6	0
GO:0045430	chalcone isomerase activity	MF	2	4	0.0366321	0.509752	2	0
GO:0016042	lipid catabolic process	BP	7	35	0.0366975	0.509752	7	0
GO:0003779	actin binding	MF	10	60	0.0367786	0.509752	9	1
GO:0008810	cellulase activity	MF	3	8	0.036801	0.509752	3	0
GO:0010119	regulation of stomatal movement	BP	8	41	0.036963	0.509752	5	3
GO:0050664	oxidoreductase activity, acting on NAD(P)H, oxygen as acceptor	MF	3	8	0.0370309	0.509752	3	0
GO:0042802	identical protein binding	MF	13	81	0.0374637	0.513827	9	4
GO:0048366	leaf development	BP	8	41	0.0377006	0.515028	3	5
GO:0048564	photosystem I assembly	BP	2	4	0.0378254	0.515028	0	2
GO:0008889	glycerophosphodiester phosphodiesterase activity	MF	4	14	0.038411	0.521114	4	0
GO:0055085	transmembrane transport	BP	54	446	0.0392869	0.531079	39	15
GO:0015995	chlorophyll biosynthetic process	BP	4	14	0.041136	0.554083	1	3
GO:0009408	response to heat	BP	12	75	0.0414953	0.556927	7	5
GO:0006108	malate metabolic process	BP	4	14	0.0421966	0.564323	4	0
GO:0005385	zinc ion transmembrane transporter activity	MF	3	10	0.0434311	0.576728	2	1
GO:0071577	zinc ion transmembrane transport	BP	3	10	0.0434311	0.576728	2	1
GO:0030145	manganese ion binding	MF	8	49	0.0435884	0.576778	7	1
GO:0008378	galactosyltransferase activity	MF	7	38	0.0439853	0.579988	7	0
GO:0032259	methylation	BP	27	218	0.0443069	0.581819	22	5
GO:0009930	longitudinal side of cell surface	CC	2	4	0.0445886	0.581819	2	0
GO:0010215	cellulose microfibril organization	BP	2	4	0.0445886	0.581819	2	0
GO:0016717	oxidoreductase activity, acting on paired donors, with oxidation of a pair of donors resulting in the reduction of molecular oxygen to two molecules of water	MF	3	9	0.0463922	0.60326	3	0
GO:0005983	starch catabolic process	BP	4	15	0.0468087	0.605056	2	2
GO:0006552	leucine catabolic process	BP	2	4	0.0468524	0.605056	0	2
GO:0046592	polyamine oxidase activity	MF	2	4	0.0473729	0.609683	2	0
GO:0048825	cotyledon development	BP	4	15	0.0477536	0.612485	3	1
GO:0006636	unsaturated fatty acid biosynthetic process	BP	3	9	0.0484458	0.617556	2	1
GO:0071805	potassium ion transmembrane transport	BP	7	35	0.0485711	0.617556	2	5
GO:0010286	heat acclimation	BP	2	4	0.048642	0.617556	0	2
GO:0006071	glycerol metabolic process	BP	4	15	0.0490198	0.618235	4	0
GO:0007094	mitotic spindle assembly checkpoint	BP	2	4	0.0492215	0.618235	2	0
GO:0010369	chromocenter	CC	2	4	0.0492264	0.618235	2	0
GO:0004748	ribonucleoside-diphosphate reductase activity, thioredoxin disulfide as acceptor	MF	2	4	0.049573	0.618235	2	0
GO:0005971	ribonucleoside-diphosphate reductase complex	CC	2	4	0.049573	0.618235	2	0
GO:0030060	L-malate dehydrogenase activity	MF	3	9	0.0497652	0.618235	3	0
GO:0006006	glucose metabolic process	BP	3	9	0.0499512	0.618235	3	0
